# Supplementary material for: Gold-catalyzed cyclization of allenyl acetal derivatives
Source: publisher site journal article supplement (doi:10.3762/bjoc.9.202), 2013-08-27
Supplement: Additional file 1 [file 1860-5397-9-202-S1.pdf]

# Supporting Information

for

## Gold-catalyzed cyclization of allenyl acetal derivatives

Dhananjayan Vasu, Samir Kundlik Pawar and Rai-Shung Liu\*

Address: Department of Chemistry, National Tsing Hua University, Hsinchu, 30013, Taiwan (ROC)

Email: Rai-Shung Liu - [rsliu@mx.nthu.edu.tw](mailto:rsliu@mx.nthu.edu.tw)

\* Corresponding author

### Experimental details

#### Table of Contents:

|       |                                                                                       |     |
|-------|---------------------------------------------------------------------------------------|-----|
| (I)   | Representative synthetic procedures-----                                              | S2  |
| (II)  | General procedure for the gold(I)-catalyzed carbocyclization-----                     | S6  |
| (III) | Spectral data of compounds ( <b>1a to 6g</b> ) -----                                  | S7  |
| (IV)  | <sup>1</sup> H and <sup>13</sup> C NMR spectra of compounds ( <b>1a to 6g</b> ) ----- | S20 |
| (V)   | <sup>1</sup> H NMR NOE spectra of compounds <b>4c, 4e, and 4f</b> -----               | S82 |
| (VI)  | X-ray structure of compound <b>6a</b> -----                                           | S92 |

## (I) Representative synthetic procedures:

### (a) General procedure:

Unless otherwise noted, all the reactions were performed in oven-dried glassware under nitrogen atmosphere with freshly distilled solvents. The THF was dried with sodium/benzophenone and distilled before use. *N,N*-dimethylformamide (DMF) and dichloromethane (DCM) were distilled from CaH<sub>2</sub> under nitrogen. DMF and triethylamine (Et<sub>3</sub>N) were stored over 4 Å molecular sieves prior to use. All other commercial reagents were used without further purification. <sup>1</sup>H NMR and <sup>13</sup>C NMR spectra were recorded on a Varian 400, Bruker 400 and a Bruker 600 MHz spectrometer using chloroform-*d* (CDCl<sub>3</sub>) and benzene-*d*<sub>6</sub> (C<sub>6</sub>D<sub>6</sub>) as internal standard.

### (b) Typical procedure for the synthesis of 1-(dimethoxymethyl)-2-(3-methylbuta-1,2-dienyl)cyclohex-1-ene (**1a**). [1,2]

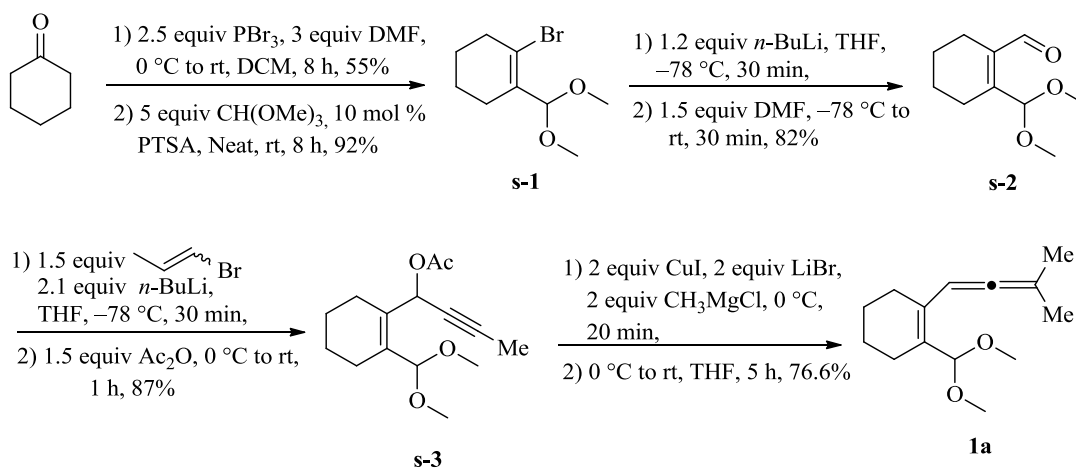

**Scheme S1:**

#### (b-1) Synthesis of 1-bromo-2-(dimethoxymethyl)cyclohex-1-ene (**s-1**). [1]

To dry DMF (11.8 mL, 152.9 mmol) in DCM (100 mL) was slowly added PBr<sub>3</sub> (12.0 mL, 127.5 mmol) at 0 °C and the mixture was stirred for 1 h at this temperature before the addition of cyclohexanone (5 g, 51.0 mmol) in dry DCM. The resulting solution was stirred for 8 h at room temperature. After completion of the reaction, the residue was carefully and slowly added to crushed ice and neutralized with saturated NaHCO<sub>3</sub> solution and extracted with EtOAc (3 × 50

mL). The combined organic extracts were initially washed with saturated aqueous  $\text{NaHCO}_3$ , followed by water and brine. The organic phase was dried over  $\text{MgSO}_4$ , filtered, and concentrated in vacuo to afford the crude bromocyclohex-1-enecarbaldehyde (5.30 g, 28.0 mmol, 55%) as yellow oil. To this yellow oil, 15.3 mL (140.2 mmol) of trimethyl orthoformate and PTSA (0.48 g, 2.80 mmol) were added and stirred at 25–30 °C until complete consumption of the aldehyde (8 h, TLC). After completion of the reaction, the mixture was diluted with hexane and neutralized by using saturated aqueous  $\text{NaHCO}_3$  solution. The resulting mixture was then extracted with hexane (2 × 20 mL). The combined organic layer was dried over anhydrous  $\text{Na}_2\text{SO}_4$  and concentrated under reduced pressure to afford the crude product (**s-1**) (6.06 g, 25.8 mmol, 92%) as pale yellow oil that was used for the next step without further purification.

#### **(b-2) Synthesis of 2-(dimethoxymethyl)cyclohex-1-enecarbaldehyde (s-2).**

To a THF (100 mL) solution of crude compound (**s-1**) (6.06 g, 25.8 mmol) was added *n*-butyllithium (12.4 mL, 30.9 mmol, 2.5 M) at –78 °C, and the mixtures were stirred for 30 min. The reaction was quenched by adding dried DMF (2.99 mL, 38.7 mmol), and the resulting mixture was allowed to reach room temperature for another 30 min. The resulting solution was partitioned between 50 mL hexane and saturated  $\text{Na}_2\text{CO}_3$  (aq) (1:1, v/v), and the aqueous layer was extracted with hexane (2 × 30 mL). The combined organic layer was dried over anhydrous  $\text{Na}_2\text{SO}_4$  and concentrated under reduced pressure. The residue was eluted through a triethylamine-pretreated silica gel column to give compound (**s-2**) (3.89 g, 21.1 mmol, 82%) as pale yellow oil.

#### **(b-3) Synthesis of 1-(2-(dimethoxymethyl)cyclohex-1-enyl)but-2-ynyl acetate (s-3).**

A THF (100 mL) solution of 1-bromo-1-propene (2.71 mL, 31.7 mmol) was cooled to –78 °C before addition of *n*-butyllithium (17.7 mL, 44.4 mmol, 2.5 M). The reaction was kept at –78 °C for 30 min, and to this solution was added a THF (5 mL) solution of compound (**s-2**) (3.89 g, 21.1 mmol) and the reaction was allowed to reach room temperature for 30 min, followed by addition of acetic anhydride (2.99 mL, 31.7 mmol) at 0 °C. The resulting mixture was stirred at room temperature for another 1 h before it was quenched with saturated aqueous  $\text{Na}_2\text{CO}_3$ . The aqueous solution was extracted with hexane (30 mL × 3). The combined organic layer was dried

over anhydrous Na<sub>2</sub>SO<sub>4</sub> and concentrated in vacuo. The crude product **s-3** (4.89 g, 18.4 mmol, 87%) was obtained as pale yellow oil and used for next step without further purification.

**(b-4) Synthesis of 1-(dimethoxymethyl)-2-(3-methylbuta-1,2-dienyl)cyclohex-1-ene (1a).** [2]

To a well stirred mixture of lithium bromide (3.19 g, 36.8 mmol) and copper iodide (6.98 g, 36.8 mmol) in THF (100 mL) at 0 °C was added methylmagnesium chloride (12.3 mL, 36.8 mmol, 3 M), and the solution was stirred for 20 min at 0 °C. The propargylic ester (**s-3**) (4.89 g, 18.4 mmol) in THF (5 mL) was added dropwise and the resulting mixture was slowly warmed to rt and stirred for an additional 5 h. At the completion of the reaction indicated by TLC, the mixture was poured into a saturated aqueous solution of ammonium chloride and partitioned between hexane/saturated Na<sub>2</sub>CO<sub>3</sub> (aq) (1:2, v/v). The aqueous layer was extracted with hexane (2 × 100 mL). The combined organic layer was dried over anhydrous Na<sub>2</sub>SO<sub>4</sub> and evaporated under reduced pressure. The crude product was purified on a triethylamine-pretreated silica column to afford desired vinylallenyl acetal (**1a**) (3.35 g, 14.1 mmol, 76.6%) as a yellow oil.

**(c) Synthesis of 4-(2-(dimethoxymethyl)-5,5-dimethylcyclohex-1-enyl)-2-methylbut-3-yn-2-yl acetate (5a):**

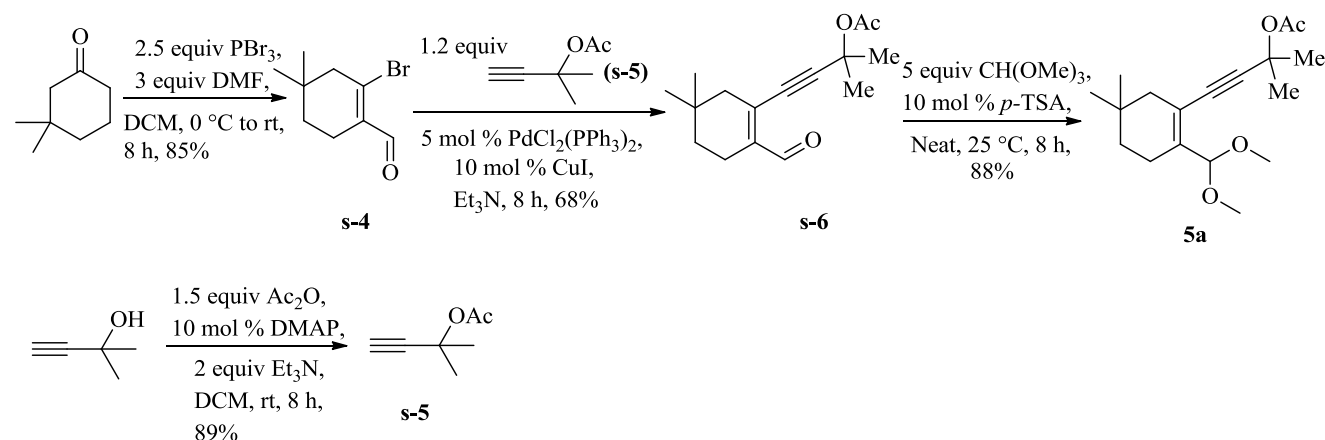

**Scheme S2:**

### **(c-1) Synthesis of 2-bromo-4,4-dimethylcyclohex-1-enecarbaldehyde (s-4). [1]**

To dry DMF (9.20 mL, 118.9 mmol) in chloroform (100 mL) was slowly added PBr<sub>3</sub> (9.31 mL, 99.0 mmol) at 0 °C and the mixture was stirred for 1 h at this temperature before addition of 3,3-dimethylcyclohexanone (5 g, 39.6 mmol) in dry DCM. The resulting solution was stirred for 8 h at room temperature. After completion of the reaction, the residue was carefully added to crushed ice and neutralized with saturated NaHCO<sub>3</sub> solution and extracted with EtOAc (3 × 50 mL). The combine organic extracts were initially washed with saturated aqueous NaHCO<sub>3</sub> followed by water and brine. The organic phase was dried over MgSO<sub>4</sub>, filtered, and concentrated in vacuo. The crude residue was purified by flash chromatography (hexane/ethyl acetate, 9:1) to afford 2-bromo-4,4-dimethylcyclohex-1-enecarbaldehyde (**s-4**) (7.31 g, 85%, 33.7 mmol) as a yellow oil.

### **(c-2) Synthesis of 2-methylbut-3-yn-2-yl acetate (s-5).**

To a DCM (200 mL) solution of 2-methylbut-3-yn-2-ol (10 g, 118.9 mmol) was added Ac<sub>2</sub>O (18.2 g, 178.4 mmol), Et<sub>3</sub>N (24.1 g, 237.8 mmol) and several crystals of DMAP (1.45 g, 11.9 mmol). The mixture was stirred overnight at room temperature. Upon completion of the reaction as indicated by TLC, the solution was then quenched with saturated ammonium chloride (aq). The resulting mixture was partitioned between 200 mL hexane and saturated Na<sub>2</sub>CO<sub>3</sub> (aq) (1:1, v/v), and the aqueous layer was extracted with hexane (2 × 50 mL). The combined organic layer was dried over anhydrous Na<sub>2</sub>SO<sub>4</sub> and concentrated under reduced pressure. The crude product was eluted through a triethylamine-pretreated silica gel column to afford compound (**s-5**) (13.4 g, 89%, 106.2 mmol) as pale yellow oil.

### **(c-3) Synthesis of 4-(2-formyl-5,5-dimethylcyclohex-1-enyl)-2-methylbut-3-yn-2-yl acetate (s-6).**

To a suspension of PdCl<sub>2</sub>(PPh<sub>3</sub>)<sub>2</sub> (1.18 g, 1.68 mmol) and CuI (0.641 g, 3.37 mmol) in 50 mL triethylamine at room temperature compound (**s-4**) (7.31 g, 33.7 mmol) was added and stirred for 15 min. To this solution, 2-methylbut-3-yn-2-yl acetate (**s-5**) (5.10 g, 40.4 mmol) was added dropwise using a standard syringe. After stirring the mixture at room temperature for 8 h the resulting solution was filtered through a small celite bed and washed three times with ethyl acetate. It was then concentrated and purified by column chromatography, which yielded the product **s-6** (6.00 g, 68%, 22.9 mmol) as yellow oil.

### **(c-4) Synthesis of 4-(2-(dimethoxymethyl)-5,5-dimethylcyclohex-1-enyl)-2-methylbut-3-yn-2-yl acetate (5a). [3]**

A mixture of aldehyde (**s-6**) (6.00 g, 22.9 mmol), *p*-TsOH monohydrate (0.394 g, 2.29 mmol) and trimethyl orthoformate (12.53 mL, 114.5 mmol) was stirred at 25 °C for 8 h and then concentrated in vacuo. The residue was diluted with hexane, washed with saturated NaHCO<sub>3</sub> solution, water, and brine. The organic phase was dried over Na<sub>2</sub>SO<sub>4</sub>, filtered, and concentrated under reduced pressure. The crude residue was purified by column chromatography with

pretreated triethylamine silica gel to afford the desired propargylic ester acetal (**5a**) (6.22 g, 20.2 mmol, 88%) as yellow oil.

## References:

1. Vasu, D.; Liu, R.-S. *Chem. Eur. J.* **2012**, *18*, 13638. DOI:10.1002/chem.201201777
2. Macdonald, T. L.; Reagan D. R., *J. Org. Chem.* **1980**, *45*, 4740. DOI: 10.1021/jo01311a037
3. a) Kumar, R.; Kumar D.; Chakraborti, A. K., *Synthesis*. **2007**, *2*, 299. DOI: 10.1055/s-2006-958948; b) Chakraborti, A. K.; Gulhane, R., *Chem. Commun.* **2003**, 1896. DOI: 10.1039/B304178F

## (II) General procedure for gold-catalyzed carbocyclization:

### (a) General procedure for the gold (I)-catalyzed carbocyclization of vinylallenyl acetal:

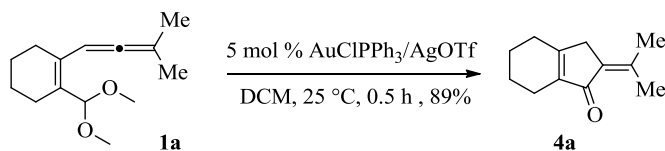

A two-necked flask was charged with chloro(triphenylphosphine)gold(I) (11.1 mg, 0.022 mmol) and silver triflate (5.8 mg, 0.022 mmol), and CH<sub>2</sub>Cl<sub>2</sub> (2.0 mL) was added. The resulting mixture was stirred at room temperature for 10 min. To this mixture was added a CH<sub>2</sub>Cl<sub>2</sub> (2.5 mL) solution of vinylallenyl acetal (**1a**) (100 mg, 0.45 mmol) dropwise and the mixture was kept stirring at 25 °C for 30 min before it was filtered over a short silica bed. The solvent was evaporated under reduced pressure. The crude product was eluted through a short silica column (3% ethyl acetate in hexane) affords the desired ketone **4a** (70.6 mg, 0.40 mmol, 89%) as a pale yellow oil.

**(b) General procedure for the gold(I)-catalyzed carbocyclization of propargylic ester acetals:**

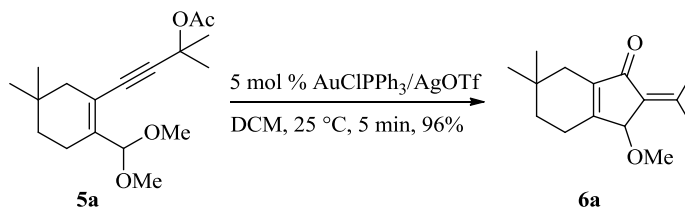

Chloro(triphenylphosphine)gold (I) (8.0 mg, 0.016 mmol) and silver triflate (4.2 mg, 0.016 mmol) was added to a dried Schlenk tube under an N<sub>2</sub> atmosphere, and then freshly distilled DCM (1.0 mL) was introduced by a syringe. The resulting mixture was stirred at room temperature for 10 minutes before the addition of propargylic ester acetal (**5a**) (100 mg, 0.32 mmol) in DCM (2.2 mL). The reaction mixture was stirred for another 5 minutes at 25 °C (reaction monitored by TLC). After completion of the reaction, the brown suspension was filtered through a short bed of silica gel and the solvent was removed under reduced pressure. The crude product was purified by flash chromatography to afford the desired ketone **6a** (58 mg, 0.25 mmol, 76%) as dark yellow oil.

**(III) Spectral data of Compounds 1a to 6g:**

**Spectral data for 1-(dimethoxymethyl)-2-(3-methylbuta-1,2-dienyl)cyclohex-1-ene (1a). [1]**

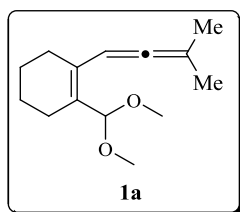

Compound **1a** was prepared according to the known literature procedure [1] reported by our laboratory.

**Spectral data for 1-(dimethoxymethyl)-2-(3-methylbuta-1,2-dienyl)cyclopent-1-ene (1b).**

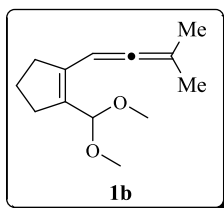

Yellow oil, IR (neat,  $\text{cm}^{-1}$ ): 2962 (s), 1649 (w), 1441 (m), 1086 (s);  $^1\text{H}$  NMR (400 MHz,  $\text{CD}_2\text{Cl}_2$ ):  $\delta$  6.15–6.12 (m, 1H), 5.02 (s, 1H), 3.28 (s, 6H), 2.47–2.38 (m, 4H), 1.83–1.77 (m, 2H), 1.75 (s, 3H), 1.73 (s, 3H);  $^{13}\text{C}$  NMR (100 MHz,  $\text{CD}_2\text{Cl}_2$ ):  $\delta$  205.3, 137.2, 134.7, 101.5, 97.0, 87.2, 53.6 (2 x  $\text{OCH}_3$ ), 35.2, 33.6, 21.9, 20.6 (2 x  $\text{CH}_3$ ); HRMS calcd for  $\text{C}_{13}\text{H}_{20}\text{O}_2$ : 208.1463, found: 208.1462.

**Spectral data for (4-(2-(dimethoxymethyl)cyclopent-1-enyl)buta-2,3-dien-2-yl)benzene (1c).**

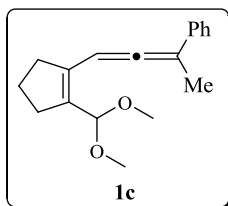

Yellow oil, IR (neat,  $\text{cm}^{-1}$ ): 2978 (s), 1638 (w), 1464 (m), 1064 (s), 867 (s), 692 (s);  $^1\text{H}$  NMR (400 MHz,  $\text{CDCl}_3$ ):  $\delta$  7.41–7.38 (m, 2H), 7.33–7.29 (m, 2H), 7.22–7.18 (m, 1H), 6.66 (q,  $J = 2.8$  Hz, 1H), 5.12 (s, 1H), 3.37 (s, 3H), 3.36 (s, 3H), 2.56–2.52 (m, 2H), 2.50–2.45 (m, 2H), 2.14 (d,  $J = 2.8$  Hz, 3H), 1.87–1.80 (m, 2H);  $^{13}\text{C}$  NMR (100 MHz,  $\text{CDCl}_3$ ):  $\delta$  208.4, 136.7, 135.8, 135.5, 128.3, 126.6, 125.7, 102.1, 101.2, 90.8, 53.6, 53.5, 34.8, 33.3, 21.4, 17.0; HRMS calcd for  $\text{C}_{18}\text{H}_{22}\text{O}_2$ : 270.1620, found: 270.1618.

**Spectral data for (1-(2-(dimethoxymethyl)cyclopent-1-enyl)penta-1,2-dien-3-yl)benzene (1d).**

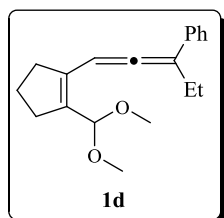

Pale yellow oil, IR (neat,  $\text{cm}^{-1}$ ): 2978 (s), 1638 (w), 1464 (m), 1064 (s), 878 (s), 686 (s);  $^1\text{H}$  NMR (400 MHz,  $\text{C}_6\text{D}_6$ ):  $\delta$  7.44–7.42 (m, 2H), 7.19–7.15 (m, 2H), 7.07–7.03 (m, 1H), 6.99 (t,  $J =$



3.2 Hz, 1H), 5.10 (s, 1H), 3.18 (s, 3H), 3.17 (s, 3H), 2.67–2.62 (m, 2H), 2.51–2.46 (m, 2H), 2.38–2.31 (m, 2H), 1.72–1.66 (m, 2H), 1.10 (t,  $J = 7.4$  Hz, 3H);  $^{13}\text{C}$  NMR (100 MHz,  $\text{C}_6\text{D}_6$ ):  $\delta$  208.2, 137.1, 136.5, 135.4, 128.7, 127.0, 126.4, 109.5, 101.4, 93.7, 52.8, 52.7, 35.3, 34.5, 23.5, 21.8, 12.9; HRMS calcd for  $\text{C}_{19}\text{H}_{24}\text{O}_2$ : 284.1776, found: 284.1773.

**Spectral data for (1,1-dimethoxy-2,6-dimethylhepta-2,4,5-trien-3-yl)benzene (1e).**

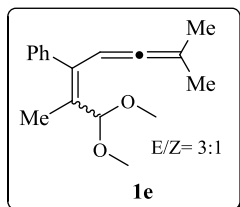

Pale yellow oil, IR (neat,  $\text{cm}^{-1}$ ): 1647 (w), 1453 (m), 1048 (s), 869 (s), 689 (s);  $^1\text{H}$  NMR (400 MHz,  $\text{CDCl}_3$ ):  $\delta$  7.28–7.24 (m, 2H), 7.21–7.19 (m, 5H), 7.08–7.04 (m, 3H), 6.28–6.25 (m, 1H), 6.15–6.12 (m, 1H), 5.24 (s, 1H), 4.40 (s, 1H), 3.41 (s, 6H), 3.17 (s, 6H), 1.85 (s, 3H), 1.42 (s, 3H), 1.41 (s, 3H), 1.40 (s, 3H);  $^{13}\text{C}$  NMR (100 MHz,  $\text{CDCl}_3$ ):  $\delta$  207.2, 206.6, 140.9, 139.8, 137.3, 137.0, 129.5, 129.3, 128.9 (1 x CH, 1 x C), 127.5, 127.3, 126.5, 126.4, 105.3, 102.8, 97.4, 97.2, 92.4, 91.0, 54.6 (2 x  $\text{OCH}_3$ ), 54.3 (2 x  $\text{OCH}_3$ ), 19.7 (2 x  $\text{CH}_3$ ), 19.6 (2 x  $\text{CH}_3$ ), 14.5, 11.0; HRMS calcd for  $\text{C}_{17}\text{H}_{22}\text{O}_2$ : 258.3554, found: 258.3552.

**Spectral data for (3-(2-(dimethoxymethyl)cyclohex-1-enyl)propa-1,2-dienyl)benzene (1f).**

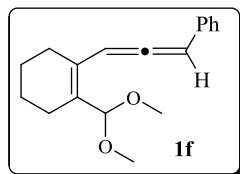

Colourless oil, IR (neat,  $\text{cm}^{-1}$ ): 2957 (s), 1633 (w), 1465 (m), 1063 (s), 872 (s), 681 (s);  $^1\text{H}$  NMR (400 MHz,  $\text{C}_6\text{D}_6$ ):  $\delta$  7.33–7.30 (m, 2H), 7.20–7.15 (m, 2H), 7.08–7.04 (m, 1H), 7.00 (d,  $J = 6.4$  Hz, 1H), 6.41 (d,  $J = 6.4$  Hz, 1H), 5.13 (s, 1H), 3.25 (s, 3H), 3.21 (s, 3H), 2.43–2.40 (m, 2H), 2.33–2.28 (m, 1H), 2.23–2.12 (m, 1H), 1.55–1.47 (m, 4H);  $^{13}\text{C}$  NMR (100 MHz,  $\text{C}_6\text{D}_6$ ):  $\delta$  208.4, 134.8, 133.7, 129.2, 129.0, 127.3, 127.1, 102.7, 98.0, 96.8, 53.7, 53.4, 27.7, 25.3, 22.8, 22.7; HRMS calcd for  $\text{C}_{18}\text{H}_{22}\text{O}_2$ : 270.1620, found: 270.1621.

**Spectral data for (4-(2-(dimethoxymethyl)cyclohex-1-enyl)buta-2,3-dien-2-yl)benzene (1g).**

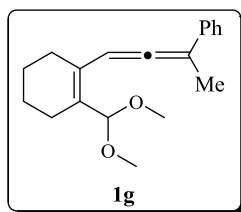

Yellow oil, IR (neat,  $\text{cm}^{-1}$ ): 2934 (s), 1647 (w), 1471 (m), 1085 (s), 869 (s), 687 (s);  $^1\text{H}$  NMR (400 MHz,  $\text{CDCl}_3$ ):  $\delta$  7.42–7.40 (m, 2H), 7.34–7.30 (m, 2H), 7.23–7.19 (m, 1H), 6.69–6.67 (m, 1H), 5.16 (s, 1H), 3.39 (s, 3H), 3.38 (s, 3H), 2.21–2.14 (m, 7H), 1.62–1.61 (m, 4H);  $^{13}\text{C}$  NMR (100 MHz,  $\text{CDCl}_3$ ):  $\delta$  206.9, 136.8, 131.8, 130.5, 128.3, 126.6, 125.6, 103.2, 102.8, 94.1, 54.4, 54.3, 27.4, 24.1, 22.4, 22.3, 17.0; HRMS calcd for  $\text{C}_{19}\text{H}_{24}\text{O}_2$ : 284.1776, found: 284.1779.

**Spectral data for (1-(2-(dimethoxymethyl)cyclohex-1-enyl)penta-1,2-dien-3-yl)benzene (1h).**

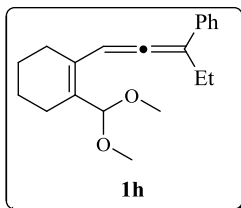

Yellow oil, IR (neat,  $\text{cm}^{-1}$ ): 2945 (s), 1638 (w), 1442 (m), 1048 (s), 872 (s), 691 (s);  $^1\text{H}$  NMR (400 MHz,  $\text{C}_6\text{D}_6$ ):  $\delta$  7.43–7.41 (m, 2H), 7.17–7.13 (m, 2H), 7.05–7.01 (m, 1H), 6.93 (t,  $J = 3.2$  Hz, 1H), 5.13 (s, 1H), 3.18 (s, 3H), 3.16 (s, 3H), 2.39–2.31 (m, 4H), 2.23–2.17 (m, 2H), 1.51–1.39 (m, 4H), 1.08 (t,  $J = 7.3$  Hz, 3H);  $^{13}\text{C}$  NMR (100 MHz,  $\text{C}_6\text{D}_6$ ):  $\delta$  206.6, 137.1, 132.9, 129.9, 128.7, 127.0, 126.3, 110.6, 102.7, 96.9, 53.7, 53.5, 27.8, 25.1, 23.5, 22.9, 22.8, 12.9; HRMS calcd for  $\text{C}_{20}\text{H}_{26}\text{O}_2$ : 298.1933, found: 298.1931.

**Spectral data for 1-(dimethoxymethyl)-2-(3-methylbuta-1,2-dienyl)cyclohex-1-ene (d<sub>1</sub>-1a).**

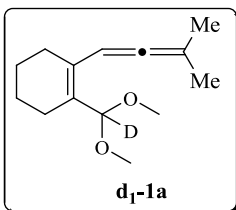

Pale yellow oil, IR (neat,  $\text{cm}^{-1}$ ): 2932 (s), 1645 (w), 1439 (m), 1012 (s);  $^1\text{H}$  NMR (400 MHz,  $\text{CDCl}_3$ ):  $\delta$  6.12–6.09 (m, 1H), 3.29 (s, 6H), 2.14–1.99 (m, 4H), 1.68 (s, 3H), 1.67 (s, 3H), 1.56–1.53 (m, 4H);  $^{13}\text{C}$  NMR (100 MHz,  $\text{CDCl}_3$ ):  $\delta$  203.5, 131.4, 130.4, 97.6, 90.0, 54.2 (2 x  $\text{OCH}_3$ ), 27.2, 23.4, 22.5, 22.4, 20.4 (2 x  $\text{CH}_3$ ); HRMS calcd for  $\text{C}_{14}\text{H}_{21}\text{DO}_2$ : 223.1683, found: 223.1689.

**Spectral data for 4-(2-(dimethoxymethyl)-5,5-dimethylcyclohex-1-enyl)-2-methylbut-3-yn-2-yl acetate (5a).**

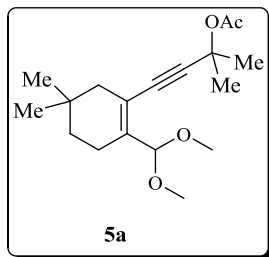

Pale yellow oil, IR (neat,  $\text{cm}^{-1}$ ): 2961 (s), 1721 (s), 1642 (w), 1468 (m), 1048 (s);  $^1\text{H}$  NMR (400 MHz,  $\text{CDCl}_3$ ):  $\delta$  5.22 (s, 1H), 3.36 (s, 6H), 2.13–2.10 (m, 2H), 1.97 (s, 3H), 1.92–1.91 (m, 2H), 1.63 (s, 6H), 1.31 (t,  $J = 6.5$  Hz, 2H), 0.86 (s, 6H);  $^{13}\text{C}$  NMR (100 MHz,  $\text{CDCl}_3$ ):  $\delta$  169.1, 141.0, 118.1, 105.2, 93.0, 83.0, 72.3, 55.2 (2 x  $\text{OCH}_3$ ), 43.4, 34.3, 29.0 (2 x  $\text{CH}_3$ ), 28.7, 27.9 (2 x  $\text{CH}_3$ ), 21.9, 19.6; HRMS calcd for  $\text{C}_{18}\text{H}_{28}\text{O}_4$ : 308.1988, found: 308.1984.

**Spectral data for 1-((2-(dimethoxymethyl)cyclopent-1-enyl)ethynyl)cyclopentyl acetate (5b).**

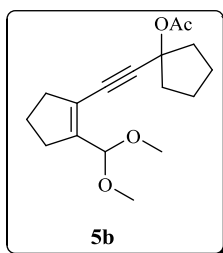

Yellow oil, IR (neat,  $\text{cm}^{-1}$ ): 2932 (s), 1728 (s), 1631 (w), 1427 (m), 1042 (s);  $^1\text{H}$  NMR (400 MHz,  $\text{C}_6\text{D}_6$ ):  $\delta$  5.44 (s, 1H), 3.37 (s, 6H), 2.63–2.58 (m, 2H), 2.43–2.38 (m, 2H), 2.30–2.15 (m, 4H), 1.65 (s, 3H), 1.61–1.50 (m, 6H);  $^{13}\text{C}$  NMR (100 MHz,  $\text{C}_6\text{D}_6$ ):  $\delta$  168.7, 149.0, 122.3, 102.5, 95.3, 81.1, 80.9, 54.6 (2 x  $\text{OCH}_3$ ), 40.7 (2 x  $\text{CH}_2$ ), 37.0, 31.4, 23.5 (2 x  $\text{CH}_2$ ), 22.6, 21.3; HRMS calcd for  $\text{C}_{17}\text{H}_{24}\text{O}_4$ : 292.1675, found: 292.1670.

**Spectral data for 3-(2-(dimethoxymethyl)cyclohex-1-enyl)-1-phenylprop-2-ynyl acetate (5c).**

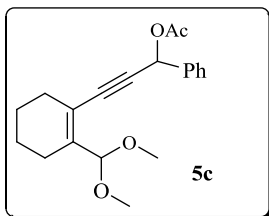

Yellow oil, IR (neat,  $\text{cm}^{-1}$ ): 2946 (s), 1730 (s), 1635 (w), 1442 (m), 1063 (s), 887 (s), 691 (s);  $^1\text{H}$  NMR (400 MHz,  $\text{CDCl}_3$ ):  $\delta$  7.52–7.49 (m, 2H), 7.39–7.31 (m, 3H), 6.56 (s, 1H), 5.12 (s, 1H), 3.33 (s, 3H), 3.30 (s, 3H), 2.20–2.19 (m, 2H), 2.12–2.11 (m, 2H), 2.08 (s, 3H), 1.60–1.57 (m, 4H);  $^{13}\text{C}$  NMR (100 MHz,  $\text{CDCl}_3$ ):  $\delta$  169.7, 143.5, 137.2, 128.8, 128.6, 127.6, 118.7, 105.2, 89.0, 86.1, 66.2, 55.2 (2 x  $\text{OCH}_3$ ), 29.8, 22.0, 21.9, 21.4, 21.0; HRMS calcd for  $\text{C}_{20}\text{H}_{24}\text{O}_4$ : 328.1675, found: 328.1673.

**Spectral data for 4-(2-(dimethoxymethyl)cyclohex-1-enyl)-2-methylbut-3-yn-2-yl acetate (5d).**

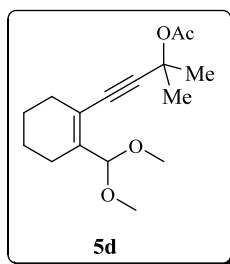

Yellow oil, IR (neat,  $\text{cm}^{-1}$ ): 2954 (s), 1722 (s), 1628 (w), 1463 (m), 1054 (s);  $^1\text{H}$  NMR (400 MHz,  $\text{CDCl}_3$ ):  $\delta$  5.19 (s, 1H), 3.33 (s, 6H), 2.11–2.09 (m, 2H), 2.06–2.04 (m, 2H), 1.94 (s, 3H), 1.60 (s, 6H), 1.54–1.50 (m, 4H);  $^{13}\text{C}$  NMR (100 MHz,  $\text{CDCl}_3$ ):  $\delta$  169.0, 142.3, 118.9, 105.3, 93.3, 82.7, 72.2, 55.1 (2 x  $\text{OCH}_3$ ), 29.8, 28.9 (2 x  $\text{CH}_3$ ), 22.1, 21.8, 21.7, 21.5; HRMS calcd for  $\text{C}_{16}\text{H}_{24}\text{O}_2$ : 280.1675, found: 280.1678.

**Spectral data for 3-(2-(dimethoxymethyl)phenyl)-1-phenylprop-2-ynyl acetate (5e).**

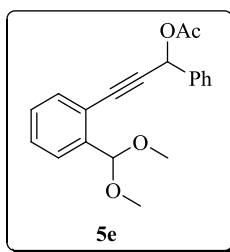

Yellow oil, IR (neat,  $\text{cm}^{-1}$ ): 3059 (m), 1735 (s), 1636 (w), 1438 (m), 1051 (s), 896 (s), 689 (s);  $^1\text{H}$  NMR (400 MHz,  $\text{CDCl}_3$ ):  $\delta$  7.62 (d,  $J = 7.4$  Hz, 2H), 7.57 (d,  $J = 7.8$  Hz, 1H), 7.48 (d,  $J = 7.8$  Hz, 1H), 7.42–7.34 (m, 4H), 7.29–7.25 (m, 1H), 6.70 (s, 1H), 5.58 (s, 1H), 3.35 (s, 3H), 3.34 (s, 3H), 2.12 (s, 3H);  $^{13}\text{C}$  NMR (100 MHz,  $\text{CDCl}_3$ ):  $\delta$  169.6, 140.4, 137.2, 132.5, 129.0, 128.9, 128.7, 128.4, 127.8, 126.2, 121.0, 102.5, 90.3, 84.8, 66.2, 54.2, 54.1, 20.9; HRMS calcd for  $\text{C}_{20}\text{H}_{20}\text{O}_4$ : 324.1362, found: 324.1366.

**Spectral data for 4-(2-(dimethoxymethyl)phenyl)but-3-yn-2-yl acetate (5f).**

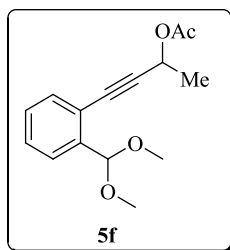

Yellow oil, IR (neat,  $\text{cm}^{-1}$ ): 3068 (m), 1730 (s), 1628 (w), 1459 (m), 1060 (s), 901 (s), 698 (s);  $^1\text{H}$  NMR (400 MHz,  $\text{CDCl}_3$ ):  $\delta$  7.54 (dd,  $J = 7.6, 1.1$  Hz, 1H), 7.41 (dd,  $J = 7.6, 1.1$  Hz, 1H), 7.31 (td,  $J = 7.6, 1.1$  Hz, 1H), 7.23 (td,  $J = 7.6, 1.1$  Hz, 1H), 5.66 (q,  $J = 6.7$  Hz, 1H), 5.57 (s, 1H), 3.38 (s, 3H), 3.37 (s, 3H), 2.06 (s, 3H), 1.57 (d,  $J = 6.7$  Hz, 3H);  $^{13}\text{C}$  NMR (100 MHz,  $\text{CDCl}_3$ ):  $\delta$  169.8, 140.0, 132.4, 128.6, 128.2, 125.9, 121.1, 102.6, 91.9, 82.0, 60.7, 54.4 (2 x OMe), 21.3, 21.0; HRMS calcd for  $\text{C}_{15}\text{H}_{18}\text{O}_4$ : 262.1205, found: 262.1209

**Spectral data for 1-(2-(dimethoxymethyl)phenyl)hept-1-yn-3-yl acetate (5g).**

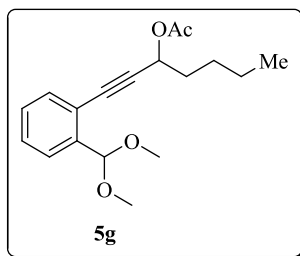

Yellow oil, IR (neat,  $\text{cm}^{-1}$ ): 3073 (m), 1734 (s), 1636 (w), 1448 (m), 1053 (s), 912 (s), 686 (s);  $^1\text{H}$  NMR (400 MHz,  $\text{CDCl}_3$ ):  $\delta$  7.51 (dd,  $J = 7.4$  Hz, 1.2 Hz, 1H), 7.38 (dd,  $J = 7.4$  Hz, 1.2 Hz, 1H), 7.26 (td,  $J = 7.4, 1.2$  Hz, 1H), 7.19 (td,  $J = 7.4$  Hz, 1.2 Hz, 1H), 5.56–5.53 (m, 2H), 3.33 (s, 3H), 3.32 (s, 3H), 2.04 (s, 3H), 1.84–1.79 (m, 2H), 1.50–1.42 (m, 2H), 1.39–1.29 (m, 2H), 0.88 (t,  $J = 7.3$  Hz, 3H);  $^{13}\text{C}$  NMR (100 MHz,  $\text{CDCl}_3$ ):  $\delta$  169.7, 139.9, 132.3, 128.4, 128.1, 125.9, 121.1, 102.4, 91.1, 82.5, 64.4, 54.1 (2 x OMe), 34.3, 27.0, 22.1, 20.8, 13.7; HRMS calcd for  $\text{C}_{18}\text{H}_{24}\text{O}_4$ : 304.1675, found: 304.1671.

**Spectral data for 2-(propan-2-ylidene)-2,3,4,5,6,7-hexahydro-1H-inden-1-one (4a).**

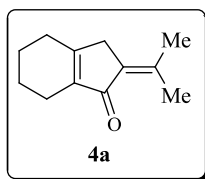

Pale yellow oil, IR (neat,  $\text{cm}^{-1}$ ): 2967 (s), 1672 (s), 1652 (m);  $^1\text{H}$  NMR (400 MHz,  $\text{CDCl}_3$ ):  $\delta$  2.91 (s, 2H), 2.28–2.25 (m, 5H), 2.14–2.10 (m, 2H), 1.81 (s, 3H), 1.70–1.65 (m, 2H), 1.64–1.60 (m, 2H);  $^{13}\text{C}$  NMR (100 MHz,  $\text{CDCl}_3$ ):  $\delta$  196.4, 162.7, 143.7, 141.7, 129.1, 35.8, 27.5, 23.8, 22.2, 21.7, 20.1, 19.4; HRMS calcd for  $\text{C}_{12}\text{H}_{16}\text{O}$ : 176.1201, found: 176.1191.

**Spectral data for 2-(propan-2-ylidene)-2,3,5,6-tetrahydropentalen-1(4*H*)-one (4b).**

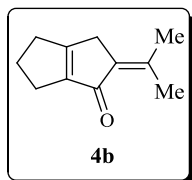

Yellow solid, IR (neat,  $\text{cm}^{-1}$ ): 2959 (s), 1671 (s), 1642 (m);  $^1\text{H}$  NMR (400 MHz,  $\text{CDCl}_3$ ):  $\delta$  2.98 (s, 2H), 2.55–2.51 (m, 2H), 2.43–2.38 (m, 2H), 2.29–2.21 (m, 5H), 1.82 (s, 3H);  $^{13}\text{C}$  NMR (100 MHz,  $\text{CDCl}_3$ ):  $\delta$  192.6, 175.1, 152.0, 144.1, 134.5, 31.6, 31.3, 27.0, 25.3, 23.7, 19.4; HRMS calcd for  $\text{C}_{11}\text{H}_{14}\text{O}$ : 162.1045, found: 162.1041.

**Spectral data for (*E*)-2-(1-phenylethylidene)-2,3,5,6-tetrahydropentalen-1(4*H*)-one (4c).**

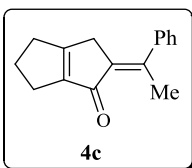

Pale yellow oil, IR (neat,  $\text{cm}^{-1}$ ): 2972 (s), 1682 (s), 1651 (m), 891 (s), 698 (s);  $^1\text{H}$  NMR (400 MHz,  $\text{CDCl}_3$ ):  $\delta$  7.37–7.33 (m, 2H), 7.29–7.26 (m, 1H), 7.22–7.20 (m, 2H), 2.89 (s, 2H), 2.58 (s, 3H), 2.50–2.44 (m, 4H), 2.29–2.22 (m, 2H);  $^{13}\text{C}$  NMR (100 MHz,  $\text{CDCl}_3$ ):  $\delta$  193.2, 177.4, 151.8, 146.3, 143.7, 135.8, 128.3, 127.4, 126.9, 32.4, 31.6, 27.0, 25.3, 19.6; HRMS calcd for  $\text{C}_{16}\text{H}_{16}\text{O}$ : 224.1201, found: 224.1200.

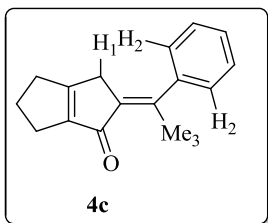

| Irradiation                        | Intensity increase                                                          |
|------------------------------------|-----------------------------------------------------------------------------|
| $\text{H}_1$ ( $\delta$ 2.89)      | $\text{H}_2$ ( $\delta$ 7.22–7.20, 3.00 %).                                 |
| $\text{H}_2$ ( $\delta$ 7.22–7.20) | $\text{H}_1$ ( $\delta$ 2.89, 1.75%), $\text{H}_3$ ( $\delta$ 2.58, 1.51%). |
| $\text{H}_3$ ( $\delta$ 2.58)      | $\text{H}_2$ ( $\delta$ 7.22–7.20, 0.76%).                                  |

**Spectral data for (*E*)-2-(1-phenylpropylidene)-2,3,5,6-tetrahydropentalen-1(4*H*)-one (4d).**

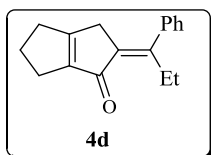

Pale yellow oil, IR (neat,  $\text{cm}^{-1}$ ): 2963 (s), 1674 (s), 1656 (m), 887 (s), 695 (s);  $^1\text{H}$  NMR (400 MHz,  $\text{CDCl}_3$ ):  $\delta$  7.37–7.32 (m, 2H), 7.30–7.26 (m, 1H), 7.17–7.14 (m, 2H), 3.12 (q,  $J = 7.5$  Hz, 2H), 2.81 (s, 2H), 2.48–2.42 (m, 4H), 2.28–2.21 (m, 2H), 0.98 (t,  $J = 7.5$  Hz, 3H);  $^{13}\text{C}$  NMR (100 MHz,  $\text{CDCl}_3$ ):  $\delta$  192.8, 177.3, 152.8, 151.9, 142.2, 135.2, 128.2, 127.3, 127.2, 32.3, 31.6, 27.0, 25.4, 25.3, 12.8; HRMS calcd for  $\text{C}_{17}\text{H}_{18}\text{O}$ : 238.1358, found: 238.1364.

**Spectral data for 2-methyl-3-phenyl-5-(propan-2-ylidene)cyclopent-2-enone (4e).**

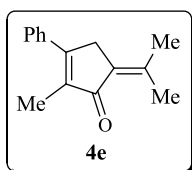

Pale yellow oil, IR (neat,  $\text{cm}^{-1}$ ): 1680 (s), 1645 (m), 897 (s), 687 (s);  $^1\text{H}$  NMR (600 MHz,  $\text{CDCl}_3$ ):  $\delta$  7.54–7.53 (m, 2H), 7.45–7.43 (m, 2H), 7.39–7.36 (m, 1H), 3.40 (s, 2H), 2.36 (s, 3H), 2.01 (t,  $J = 1.4$  Hz, 3H), 1.94 (s, 3H);  $^{13}\text{C}$  NMR (150 MHz,  $\text{CDCl}_3$ ):  $\delta$  196.9, 156.6, 145.6, 139.7, 136.3, 129.1, 128.6 (1 x CH, 1 x C), 127.8, 35.2, 24.1, 20.0, 10.3; HRMS calcd for  $\text{C}_{15}\text{H}_{16}\text{O}$ : 212.1201, found: 212.1197.

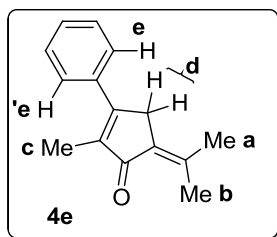

| Irradiation                 |                                                             | Intensity increase |
|-----------------------------|-------------------------------------------------------------|--------------------|
| Hd ( $\delta$ 3.40 )        | Ha ( $\delta$ 1.94, 3.38%), He ( $\delta$ 7.52–7.54, 3.86%) |                    |
| Ha ( $\delta$ 1.94)         | Hd ( $\delta$ 3.40, 2.38%)                                  |                    |
| Hc ( $\delta$ 2.00)         | He' ( $\delta$ 7.52–7.54, 1.26%).                           |                    |
| He,e' ( $\delta$ 7.52–7.54) | Hd ( $\delta$ 3.40, 2.52%)                                  |                    |

**Spectral data for (*E*)-2-benzylidene-2,3,4,5,6,7-hexahydro-1*H*-inden-1-one (4f).**

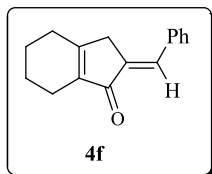

Pale yellow oil, IR (neat,  $\text{cm}^{-1}$ ): 2958 (s), 1669 (s), 1645 (m), 893 (s), 691 (s);  $^1\text{H}$  NMR (600 MHz,  $\text{CDCl}_3$ ):  $\delta$  7.56–7.55 (m, 2H), 7.40–7.37 (m, 2H), 7.34–7.31 (m, 2H), 3.36 (s, 2H), 2.42–2.40 (m, 2H), 2.27–2.24 (m, 2H), 1.79–1.75 (m, 2H), 1.71–1.68 (m, 2H);  $^{13}\text{C}$  NMR (150 MHz,  $\text{CDCl}_3$ ):  $\delta$  196.5, 166.7, 140.2, 135.7, 133.7, 130.2, 129.8, 129.0, 128.8, 36.0, 28.0, 22.3, 21.7, 20.4; HRMS calcd for  $\text{C}_{16}\text{H}_{16}\text{O}$ : 224.1201, found: 224.1195.

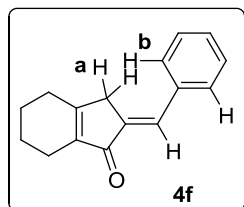

| Irradiation          | Intensity increase         |
|----------------------|----------------------------|
| Ha ( $\delta$ 3.36 ) | Hb ( $\delta$ 7.55, 4.83%) |
| Hb ( $\delta$ 7.55)  | Hd ( $\delta$ 3.36, 2.94%) |

**Spectral data for (*E*)-2-(1-phenylethylidene)-2,3,4,5,6,7-hexahydro-1*H*-inden-1-one (4g).**

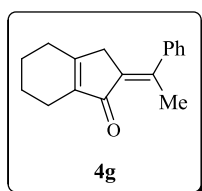

Yellow oil, IR (neat,  $\text{cm}^{-1}$ ): 2963 (s), 1672 (s), 1651 (m), 886 (s), 698 (s);  $^1\text{H}$  NMR (400 MHz,  $\text{CDCl}_3$ ):  $\delta$  7.37–7.34 (m, 2H), 7.30–7.26 (m, 1H), 7.24–7.21 (m, 2H), 2.87 (s, 2H), 2.59 (s, 3H), 2.24–2.17 (m, 4H), 1.70–1.63 (m, 4H);  $^{13}\text{C}$  NMR (100 MHz,  $\text{CDCl}_3$ ):  $\delta$  197.2, 165.0, 145.8, 143.9, 141.7, 130.6, 128.3, 127.4, 127.0, 36.8, 27.5, 22.2, 21.7, 20.2, 19.6; HRMS calcd for  $\text{C}_{17}\text{H}_{18}\text{O}$ : 238.1358, found: 238.1361.

**Spectral data for (*E*)-2-(1-phenylpropylidene)-2,3,4,5,6,7-hexahydro-1*H*-inden-1-one (4h).**

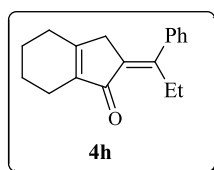

Yellow oil, IR (neat,  $\text{cm}^{-1}$ ): 2961 (s), 1676 (s), 1662 (m), 876 (s), 693 (s);  $^1\text{H}$  NMR (400 MHz,  $\text{CDCl}_3$ ):  $\delta$  7.37–7.33 (m, 2H), 7.30–7.26 (m, 1H), 7.18–7.16 (m, 2H), 3.14 (q,  $J = 7.5$  Hz, 2H), 2.79 (s, 2H), 2.21–2.17 (m, 4H), 1.70–1.60 (m, 4H), 0.98 (t,  $J = 7.5$  Hz, 3H);  $^{13}\text{C}$  NMR (100 MHz,  $\text{CDCl}_3$ ):  $\delta$  196.7, 164.9, 152.4, 142.4, 141.8, 129.9, 128.2, 127.3, 127.2, 36.7, 27.5, 25.5, 22.2, 21.8, 20.2, 12.8; HRMS calcd for  $\text{C}_{18}\text{H}_{20}\text{O}$ : 252.1514, found: 252.1512.



**Spectral data for 2-(propan-2-ylidene)-2,3,4,5,6,7-hexahydro-1H-inden-1-one (d<sub>1</sub>-4a).**

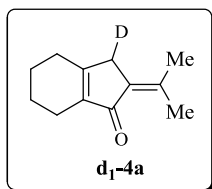

Pale yellow oil, IR (neat, cm<sup>-1</sup>): 2969 (s), 1674 (s), 1650 (m); <sup>1</sup>H NMR (400 MHz, CDCl<sub>3</sub>): δ 2.92 (s, 1H), 2.31–2.28 (m, 5H), 2.16–2.12 (m, 2H), 1.83 (s, 3H), 1.73–1.60 (m, 4H); <sup>13</sup>C NMR (100 MHz, CDCl<sub>3</sub>): δ 196.5, 162.8, 143.8, 141.9, 129.2, 35.5 (t, *J* = 19.7 Hz), 27.6, 23.9, 22.3, 21.8, 20.2, 19.5; HRMS calcd for C<sub>12</sub>H<sub>15</sub>DO: 177.1264, found: 177.1271.

**Spectral data for 6,6-dimethyl-2-(propan-2-ylidene)-2,3,4,5,6,7-hexahydro-1H-inden-1-one (6a).**

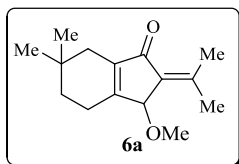

Pale yellow oil, IR (neat, cm<sup>-1</sup>): 2959 (s), 1663 (s), 1652 (m); <sup>1</sup>H NMR (400 MHz, CDCl<sub>3</sub>): δ 4.93 (s, 1H), 2.94 (s, 3H), 2.43–2.36 (m, 1H), 2.30 (s, 3H), 2.27–2.20 (m, 1H), 1.99–1.96 (m, 5H), 1.46 (t, *J* = 7.6 Hz, 2H), 0.91 (s, 3H), 0.89 (s, 3H); <sup>13</sup>C NMR (100 MHz, CDCl<sub>3</sub>): δ 194.8, 160.4, 149.3, 144.6, 128.4, 77.9, 50.2, 35.0, 33.7, 29.2, 28.0, 27.9, 23.0, 22.4, 20.1; HRMS calcd for C<sub>15</sub>H<sub>22</sub>O<sub>2</sub>: 234.1620, found: 234.1623.

**Spectral data for 2-cyclopentylidene-3-methoxy-2,3,5,6-tetrahydropentalen-1(4H)-one (6b).**

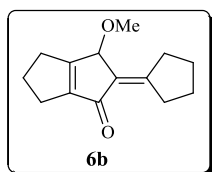

Dark yellow oil, IR (neat, cm<sup>-1</sup>): 2975 (s), 1673 (s), 1648 (m), 1121 (s); <sup>1</sup>H NMR (400 MHz, CDCl<sub>3</sub>): δ 4.81 (s, 1H), 3.13 (s, 3H), 2.88–2.84 (m, 2H), 2.65–2.33 (m, 6H), 2.32–2.25 (m, 2H), 1.74–1.59 (m, 4H); <sup>13</sup>C NMR (100 MHz, CDCl<sub>3</sub>): δ 190.2, 174.2, 159.5, 155.0, 130.6, 75.5, 52.8, 32.7, 32.0, 30.0, 26.9, 26.3, 25.3, 25.2; HRMS calcd for C<sub>14</sub>H<sub>18</sub>O<sub>2</sub>: 218.1307, found: 218.1301.

**Spectral data for (*E*)-2-benzylidene-3-methoxy-2,3,4,5,6,7-hexahydro-1*H*-inden-1-one (6c).**

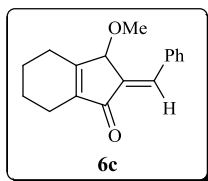

Yellow oil, IR (neat,  $\text{cm}^{-1}$ ): 2973 (s), 1672 (s), 1641 (m), 1124 (s), 885 (s), 691 (s);  $^1\text{H}$  NMR (400 MHz,  $\text{CDCl}_3$ ):  $\delta$  7.82–7.80 (m, 2H), 7.47 (d,  $J = 1.3$  Hz, 1H), 7.41–7.32 (m, 3H), 5.31 (s, 1H), 2.92 (s, 3H), 2.53–2.47 (m, 1H), 2.34–2.29 (m, 3H), 1.85–1.69 (m, 4H);  $^{13}\text{C}$  NMR (100 MHz,  $\text{CDCl}_3$ ):  $\delta$  194.1, 164.9, 144.1, 134.1, 133.8, 131.5, 131.3, 129.6, 128.6, 76.6, 49.7, 24.7, 21.8, 21.5, 20.1; HRMS calcd for  $\text{C}_{17}\text{H}_{18}\text{O}_2$ : 254.1307, found: 254.1312.

**Spectral data for 3-methoxy-2-(propan-2-ylidene)-2,3,4,5,6,7-hexahydro-1*H*-inden-1-one (6d).**

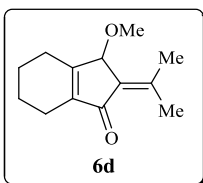

Brown oil, IR (neat,  $\text{cm}^{-1}$ ): 2965 (s), 1669 (s), 1636 (m), 1120 (s);  $^1\text{H}$  NMR (400 MHz,  $\text{CDCl}_3$ ):  $\delta$  4.90 (s, 1H), 2.95 (s, 3H), 2.42–2.35 (m, 1H), 2.30 (s, 3H), 2.24–2.13 (m, 3H), 1.95 (s, 3H), 1.79–1.66 (m, 4H);  $^{13}\text{C}$  NMR (100 MHz,  $\text{CDCl}_3$ ):  $\delta$  194.6, 161.5, 149.2, 145.1, 128.2, 78.2, 50.2, 24.5, 23.1, 22.0, 21.6, 20.1, 19.9; HRMS calcd for  $\text{C}_{13}\text{H}_{18}\text{O}_2$ : 206.1307, found: 206.1313.

**Spectral data for (*E*)-2-benzylidene-3-methoxy-2,3-dihydro-1*H*-inden-1-one (6e).**

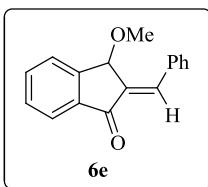

Yellow oil, IR (neat,  $\text{cm}^{-1}$ ): 2982 (m), 1672 (s), 1642 (m), 891 (s), 692 (s);  $^1\text{H}$  NMR (400 MHz,  $\text{CDCl}_3$ ):  $\delta$  7.95–7.92 (m, 2H), 7.89 (d,  $J = 7.7$  Hz, 1H), 7.82 (d,  $J = 1.5$  Hz, 1H), 7.74–7.66 (m, 2H), 7.53–7.49 (m, 1H), 7.47–7.40 (m, 3H), 5.95 (d,  $J = 1.5$  Hz, 1H), 2.91 (s, 3H);  $^{13}\text{C}$  NMR (100 MHz,  $\text{CDCl}_3$ ):  $\delta$  192.4, 148.5, 138.8, 138.6, 135.1, 134.0, 133.4, 131.9, 130.4, 129.8, 128.8, 126.2, 123.7, 74.7, 50.4; HRMS calcd for  $\text{C}_{17}\text{H}_{14}\text{O}_2$ : 250.0994, found: 250.0991.

**Spectral data for (*E*)-2-ethylidene-3-methoxy-2,3-dihydro-1*H*-inden-1-one (6f).**

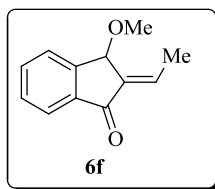

Yellow oil, IR (neat,  $\text{cm}^{-1}$ ): 2953 (m), 1668 (s), 1642 (m), 887 (s), 697 (s);  $^1\text{H}$  NMR (400 MHz,  $\text{CDCl}_3$ ):  $\delta$  7.85 (d,  $J = 7.8$  Hz, 1H), 7.71–7.65 (m, 2H), 7.52–7.48 (m, 1H), 7.19–7.13 (m, 1H), 5.73 (s, 1H), 3.00 (s, 3H), 2.10 (d,  $J = 7.4$  Hz, 3H);  $^{13}\text{C}$  NMR (100 MHz,  $\text{CDCl}_3$ ):  $\delta$  191.2, 148.5, 138.9, 138.3, 136.7, 134.9, 129.6, 126.2, 123.8, 74.8, 51.2, 14.8; HRMS calcd for  $\text{C}_{12}\text{H}_{12}\text{O}_2$ : 188.0837, found: 188.0841.

**Spectral data for (*E*)-3-methoxy-2-pentylidene-2,3-dihydro-1*H*-inden-1-one (6g).**

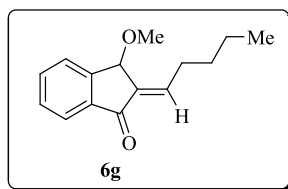

Yellow oil, IR (neat,  $\text{cm}^{-1}$ ): 2957 (m), 1670 (s), 1645 (m), 895 (s), 691 (s);  $^1\text{H}$  NMR (400 MHz,  $\text{CDCl}_3$ ):  $\delta$  7.84 (d,  $J = 7.6$  Hz, 1H), 7.69–7.63 (m, 2H), 7.50–7.46 (m, 1H), 7.07 (td,  $J = 7.8$  Hz, 1.7 Hz, 1H), 5.70 (s, 1H), 2.98 (s, 3H), 2.51–2.45 (m, 2H), 1.56–1.49 (m, 2H), 1.44–1.35 (m, 2H), 0.92 (t,  $J = 7.2$  Hz, 3H);  $^{13}\text{C}$  NMR (100 MHz,  $\text{CDCl}_3$ ):  $\delta$  191.4, 148.5, 143.6, 139.0, 135.6, 134.9, 129.7, 126.2, 123.8, 74.9, 51.2, 30.5, 28.8, 22.6, 13.8; HRMS calcd for  $\text{C}_{15}\text{H}_{18}\text{O}_2$ : 230.1307, found: 230.1310.

Current Data Parameters  
NAME 22.07.2010  
EXPNO 5  
PROCNO 1

F2 - Acquisition Parameters  
Date\_ 20100722  
Time 22.09  
INSTRUM spect  
PROBHD 5 mm DUL 13C-1  
PULPROG zg30  
TD 32768  
SOLVENT CD2Cl2  
NS 53  
DS 0  
SWH 6410.256 Hz  
FIDRES 0.195625 Hz  
AQ 2.5559540 sec  
RG 36  
RW 78.000 usec  
DE 6.00 usec  
TE 300.0 K  
D1 2.00000000 sec  
TDO 1

----- CHANNEL f1 -----  
NUC1 13C  
P1 10.00 usec  
PL1 -2.40 dB  
SFO1 400.1528010 MHz

F2 - Processing parameters  
SI 16384  
SF 400.1507828 MHz  
WDW EM  
SSB 0  
LA 0.00 Hz  
GB 0  
PC 1.00

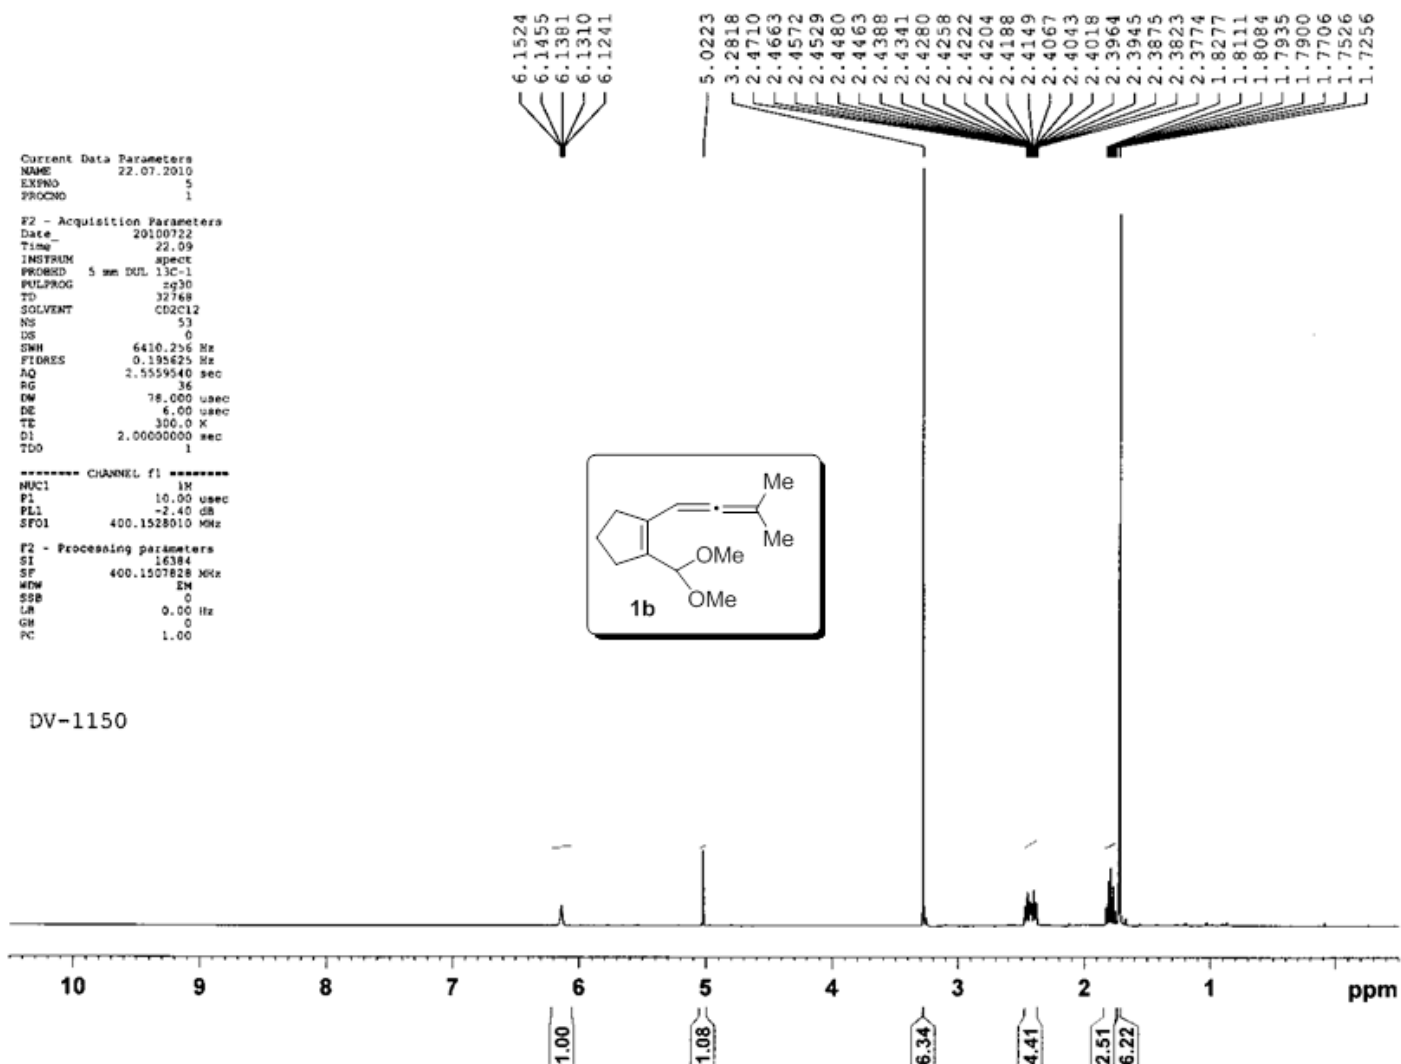

DV-1150

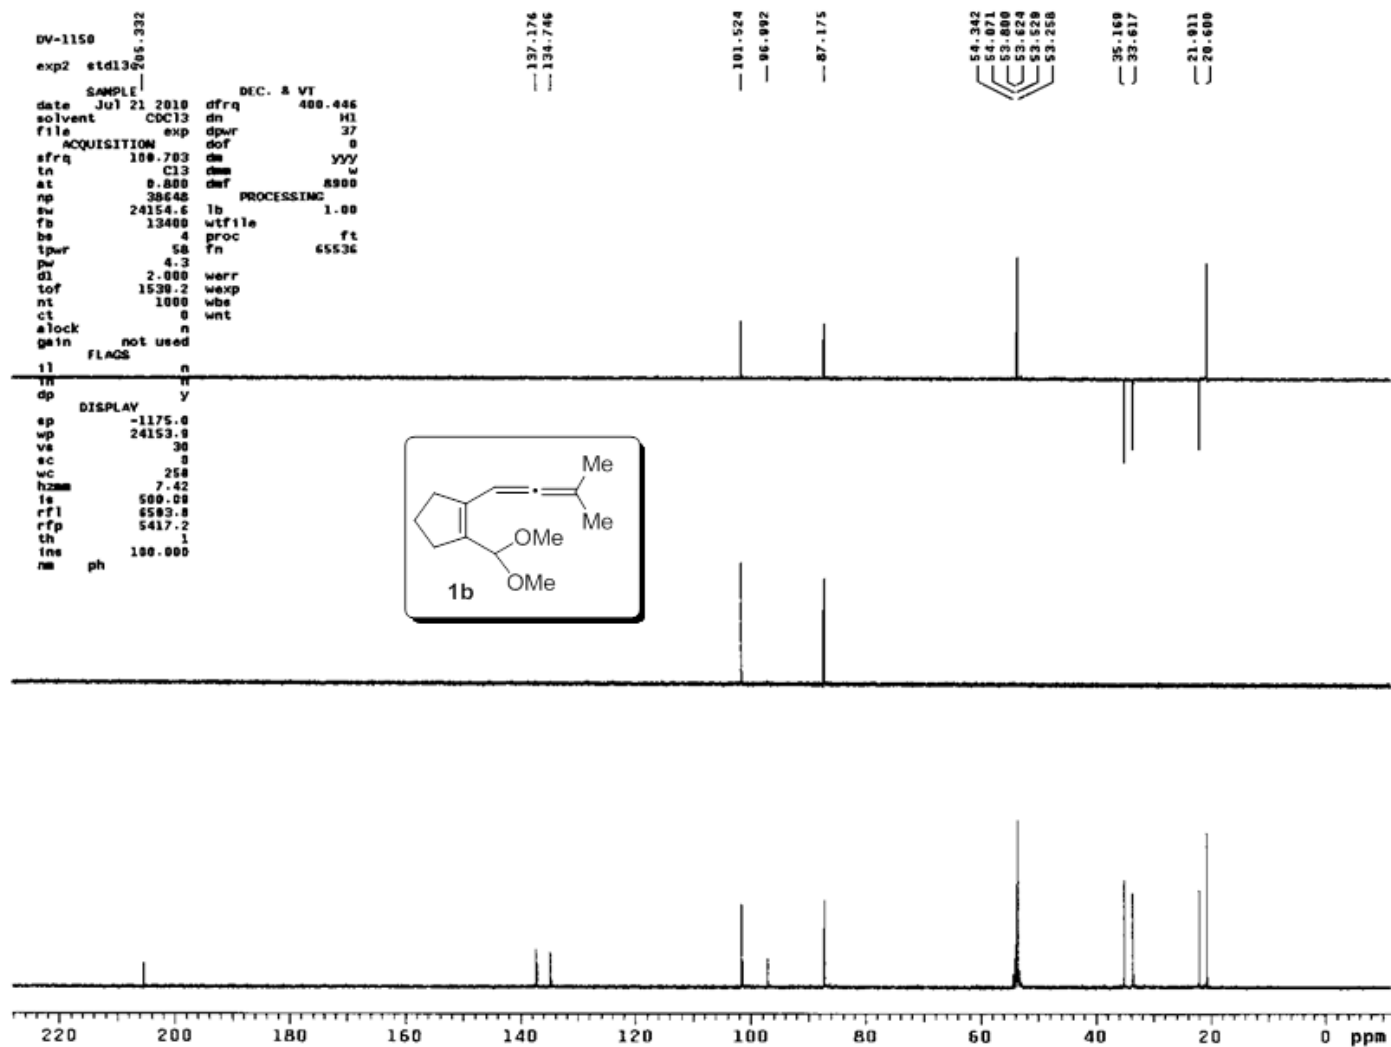

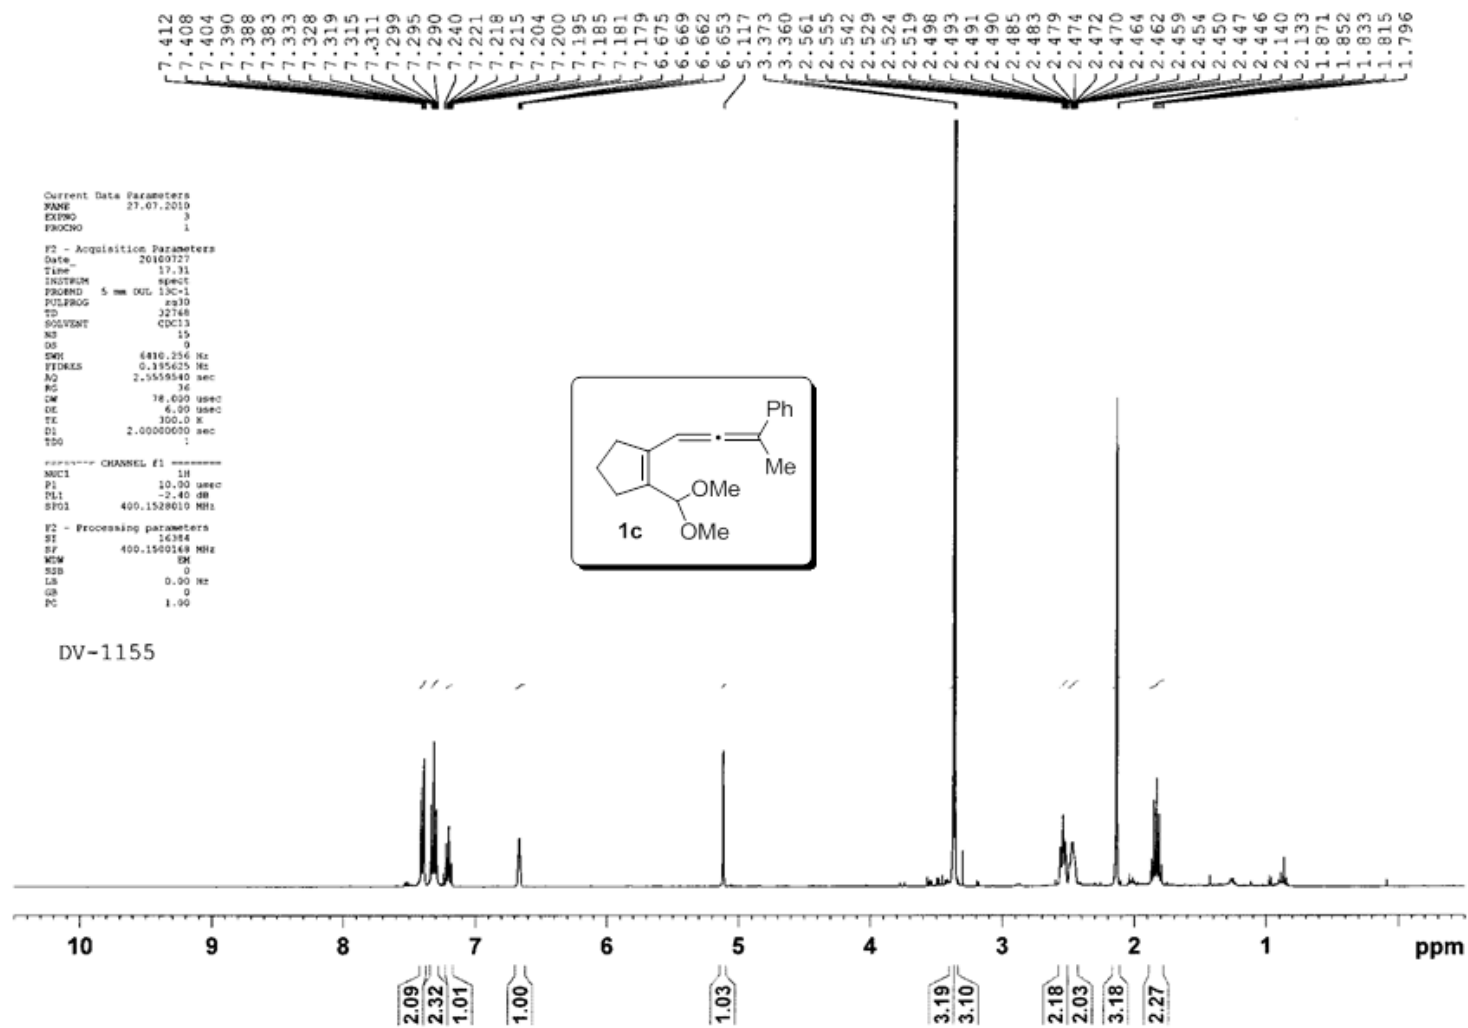

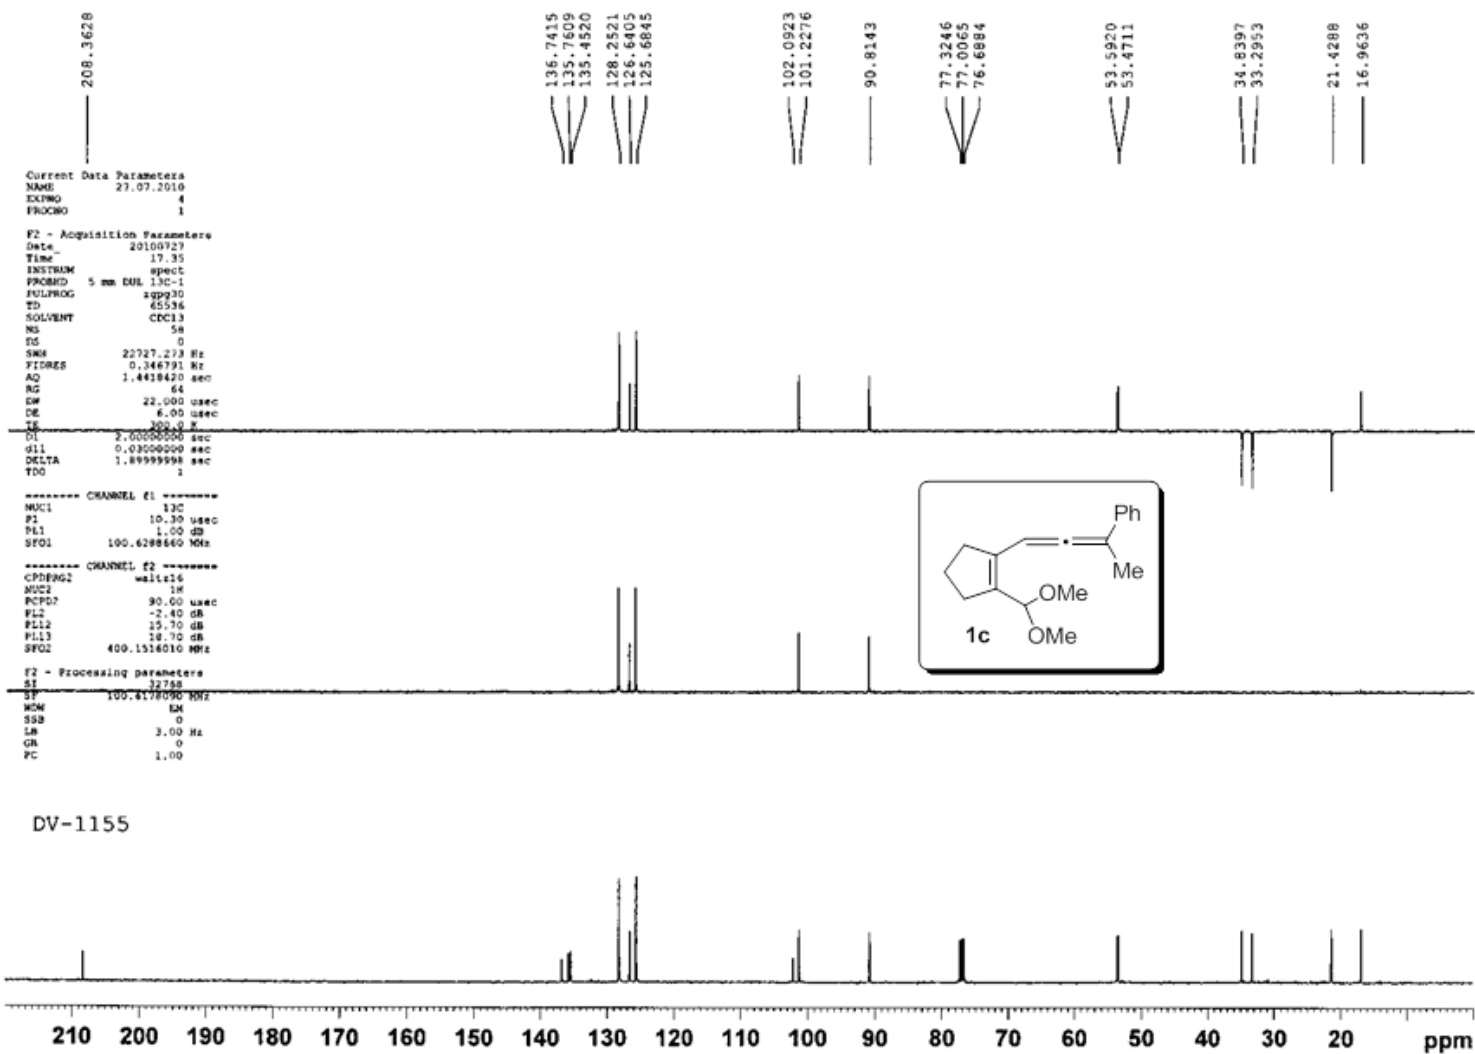

DV-1155

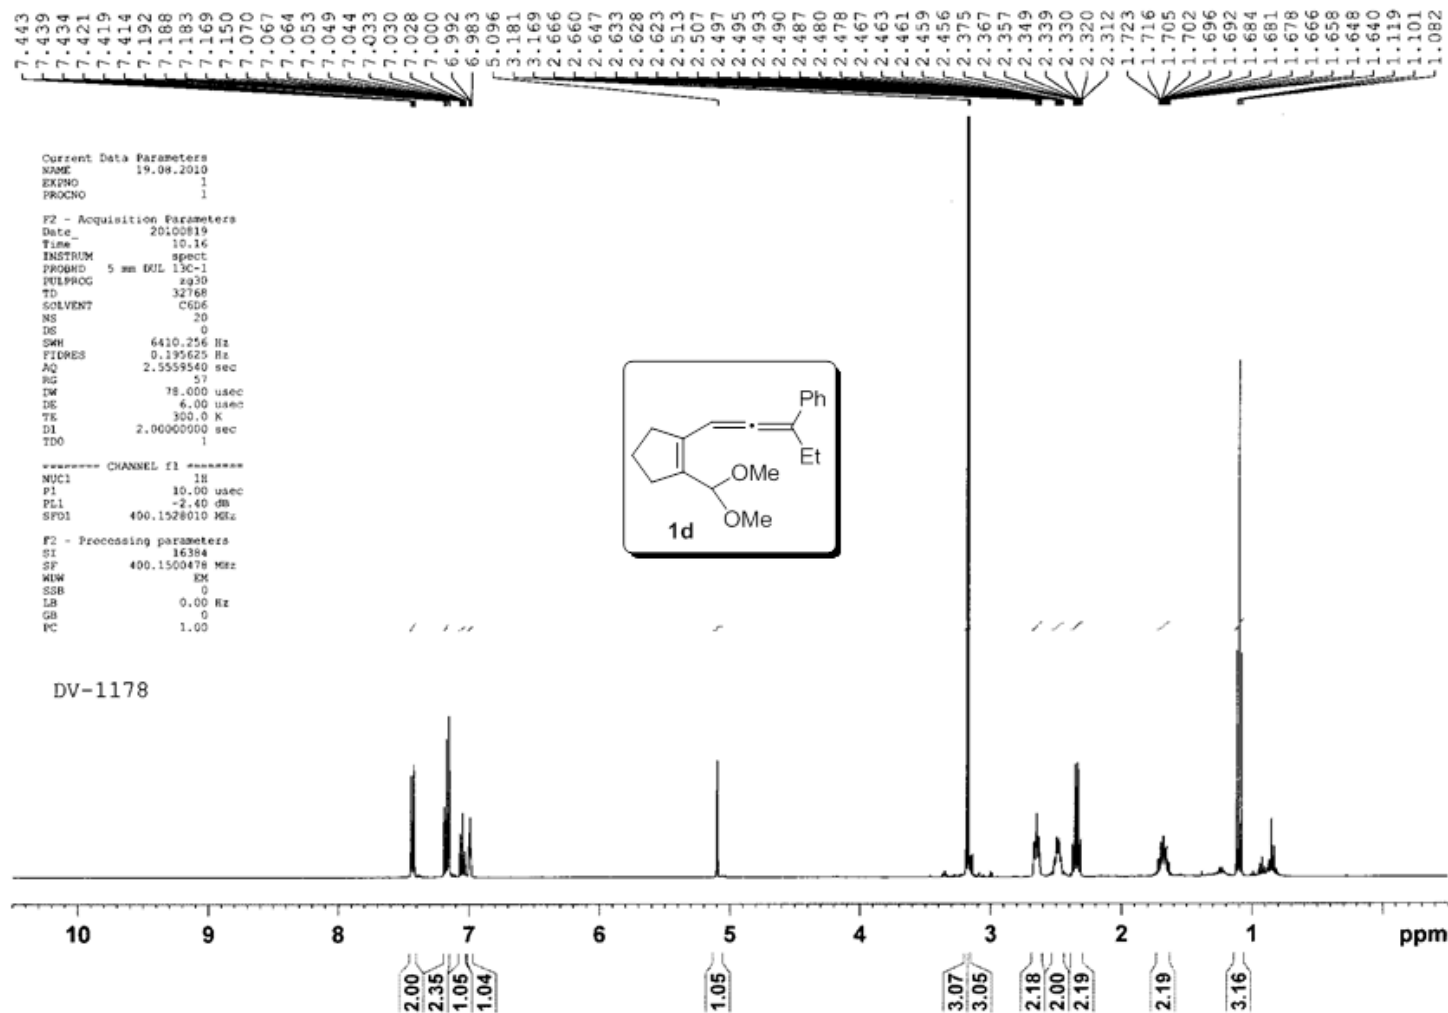



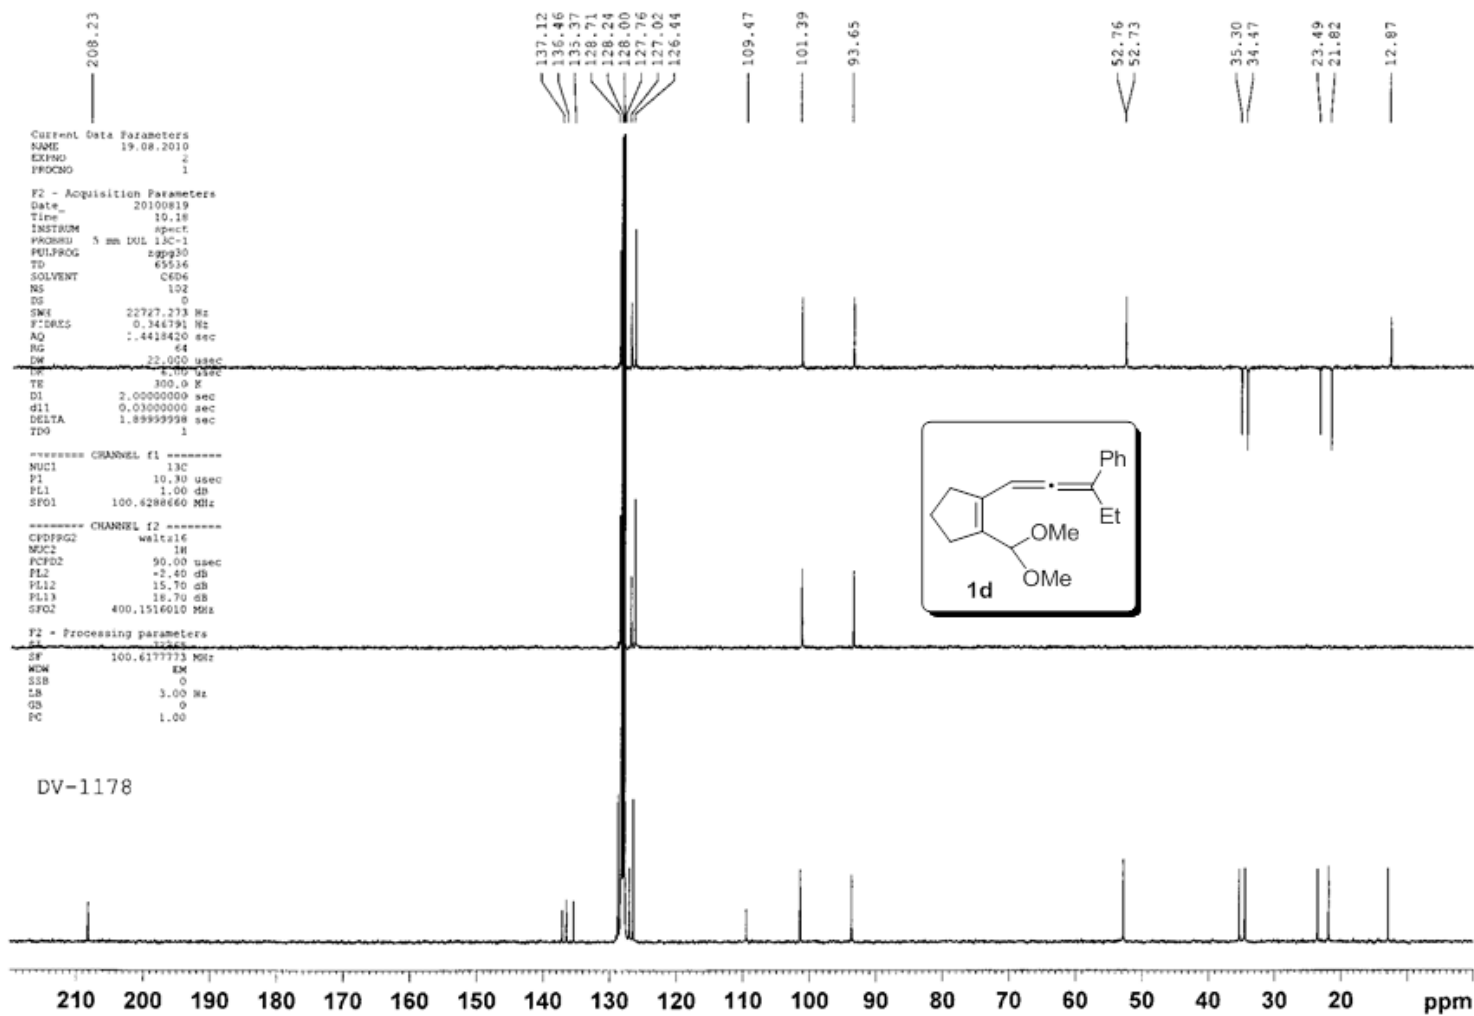

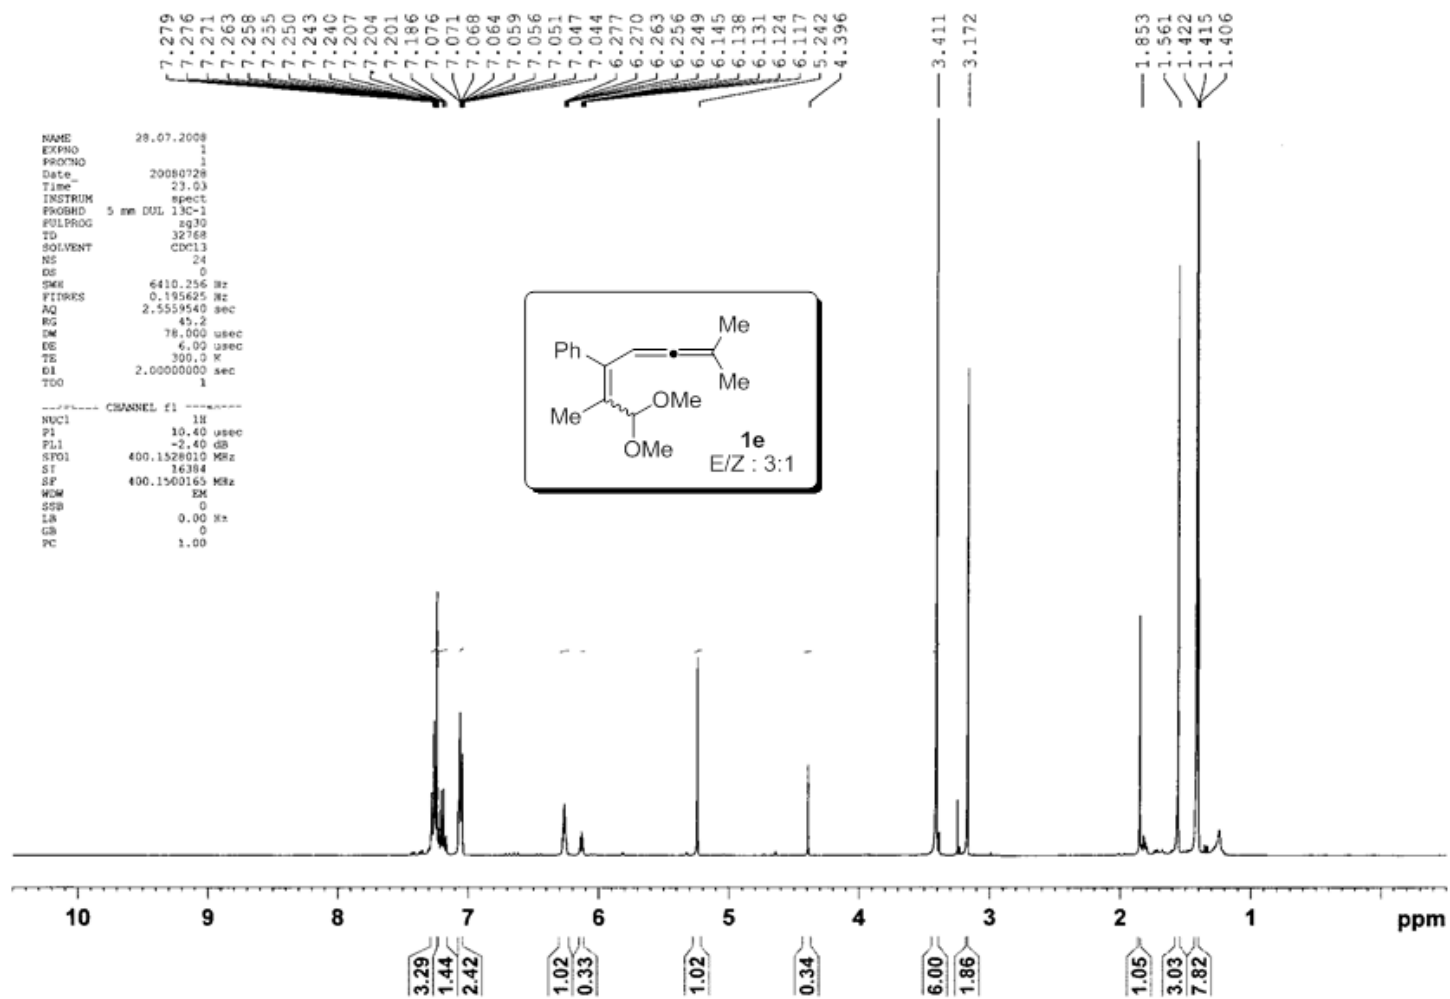

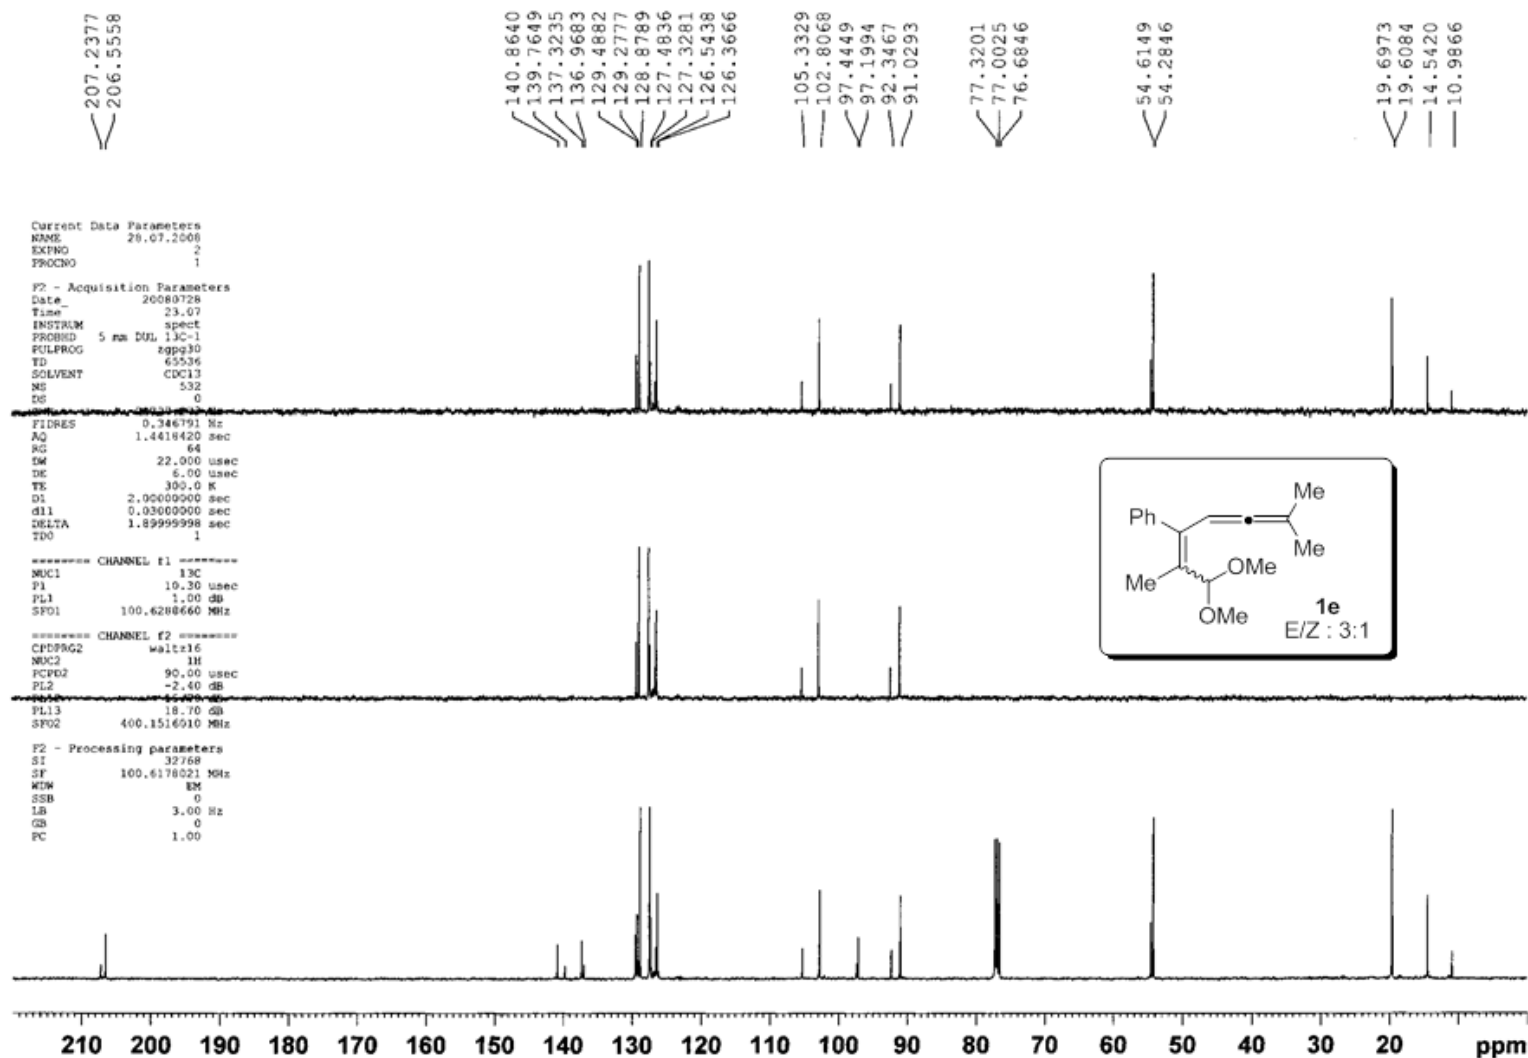

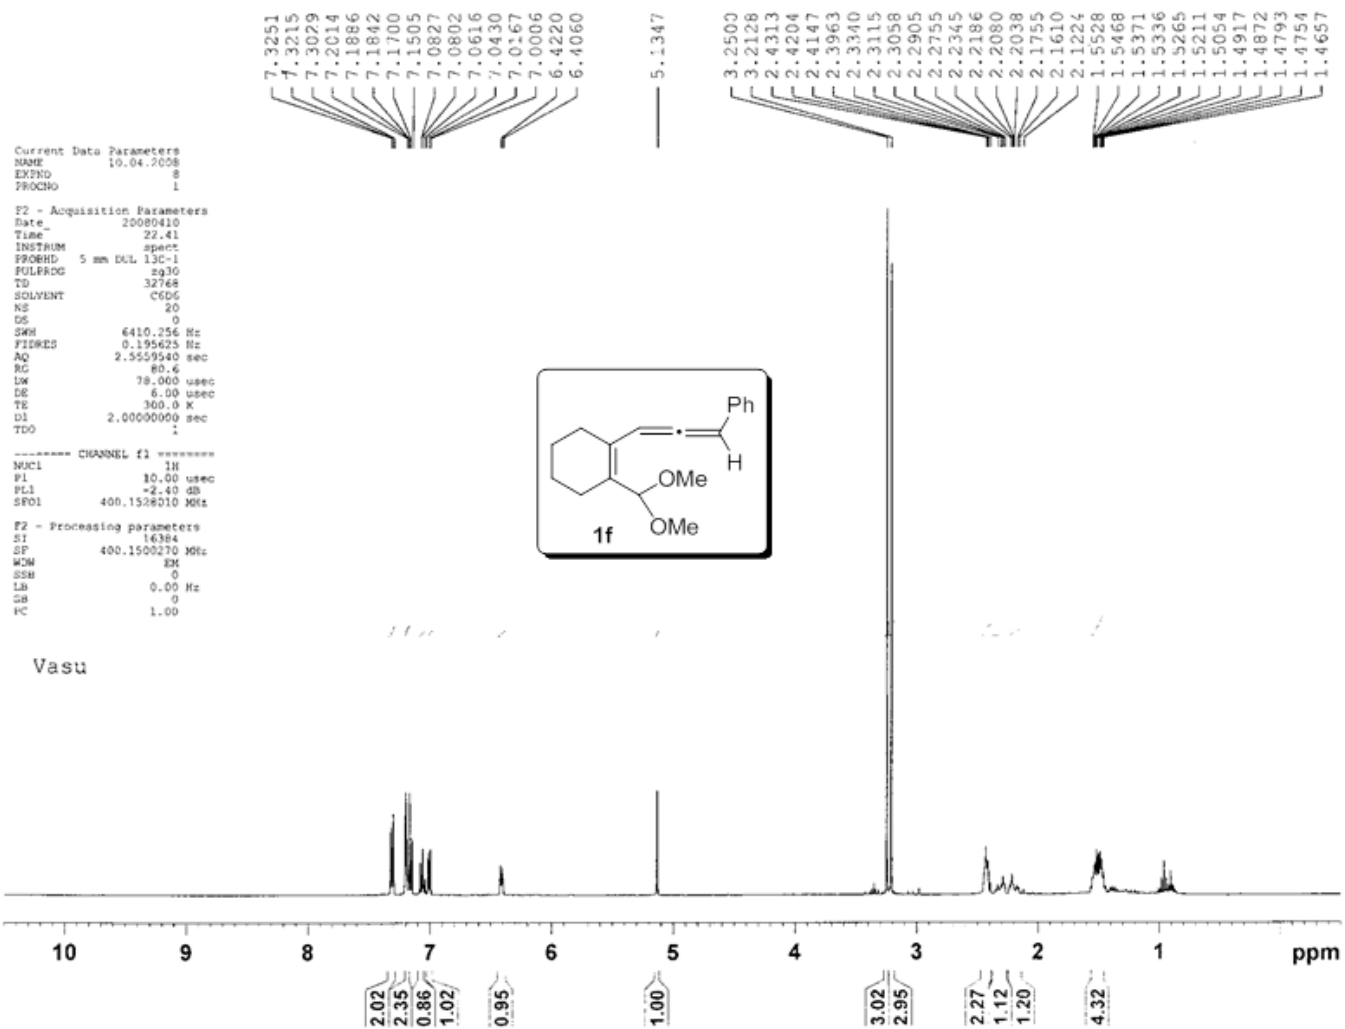

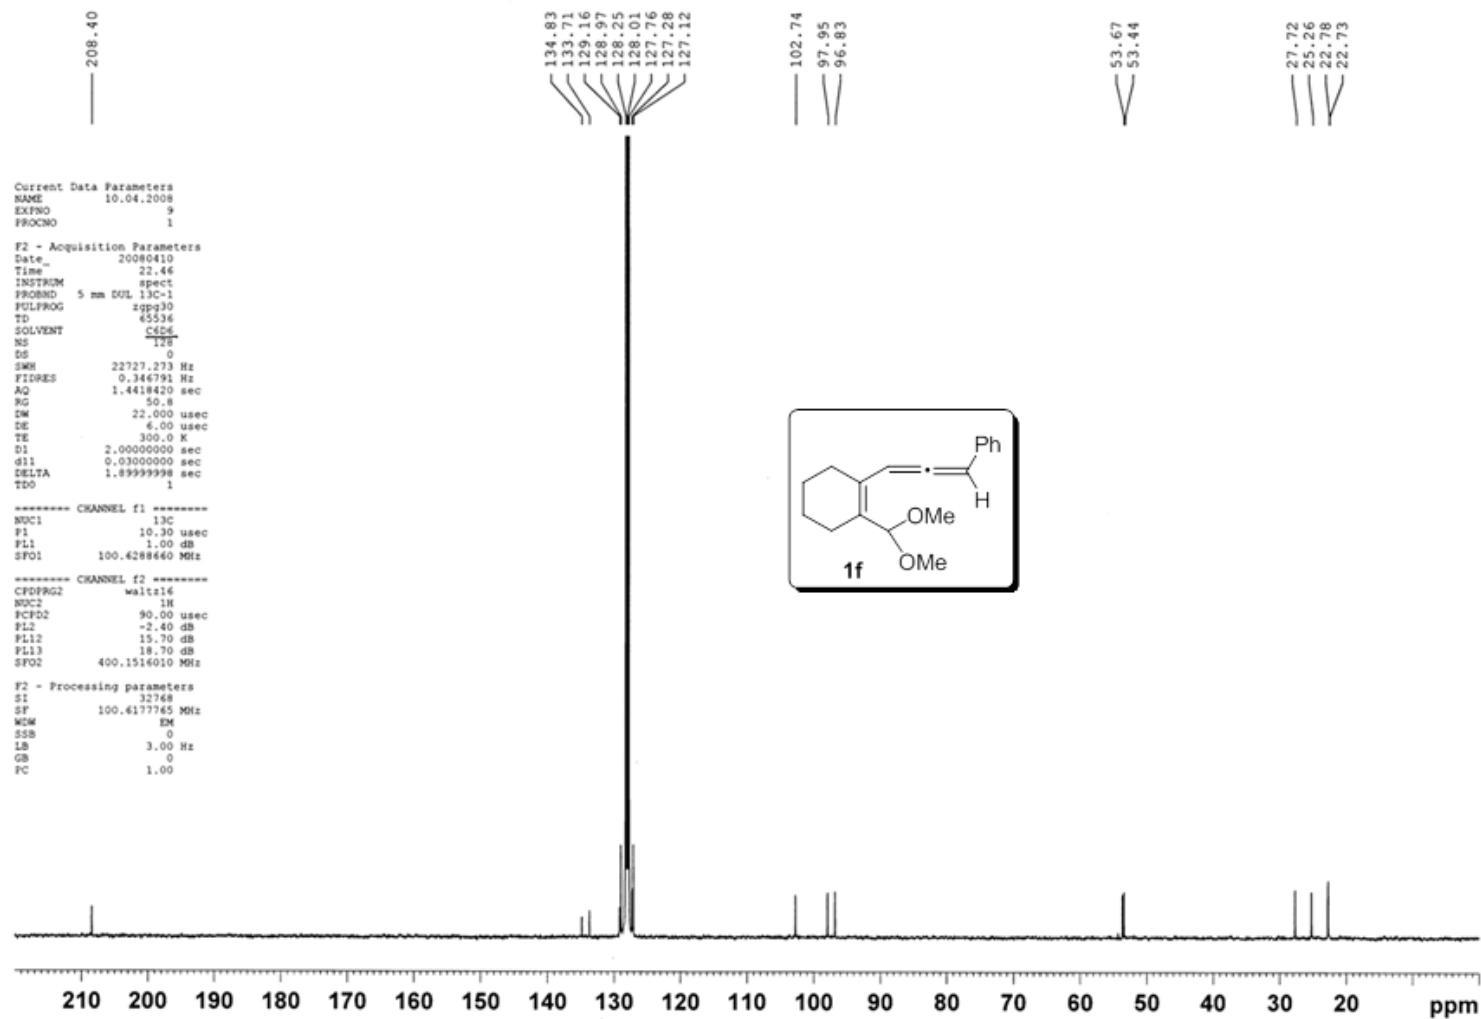

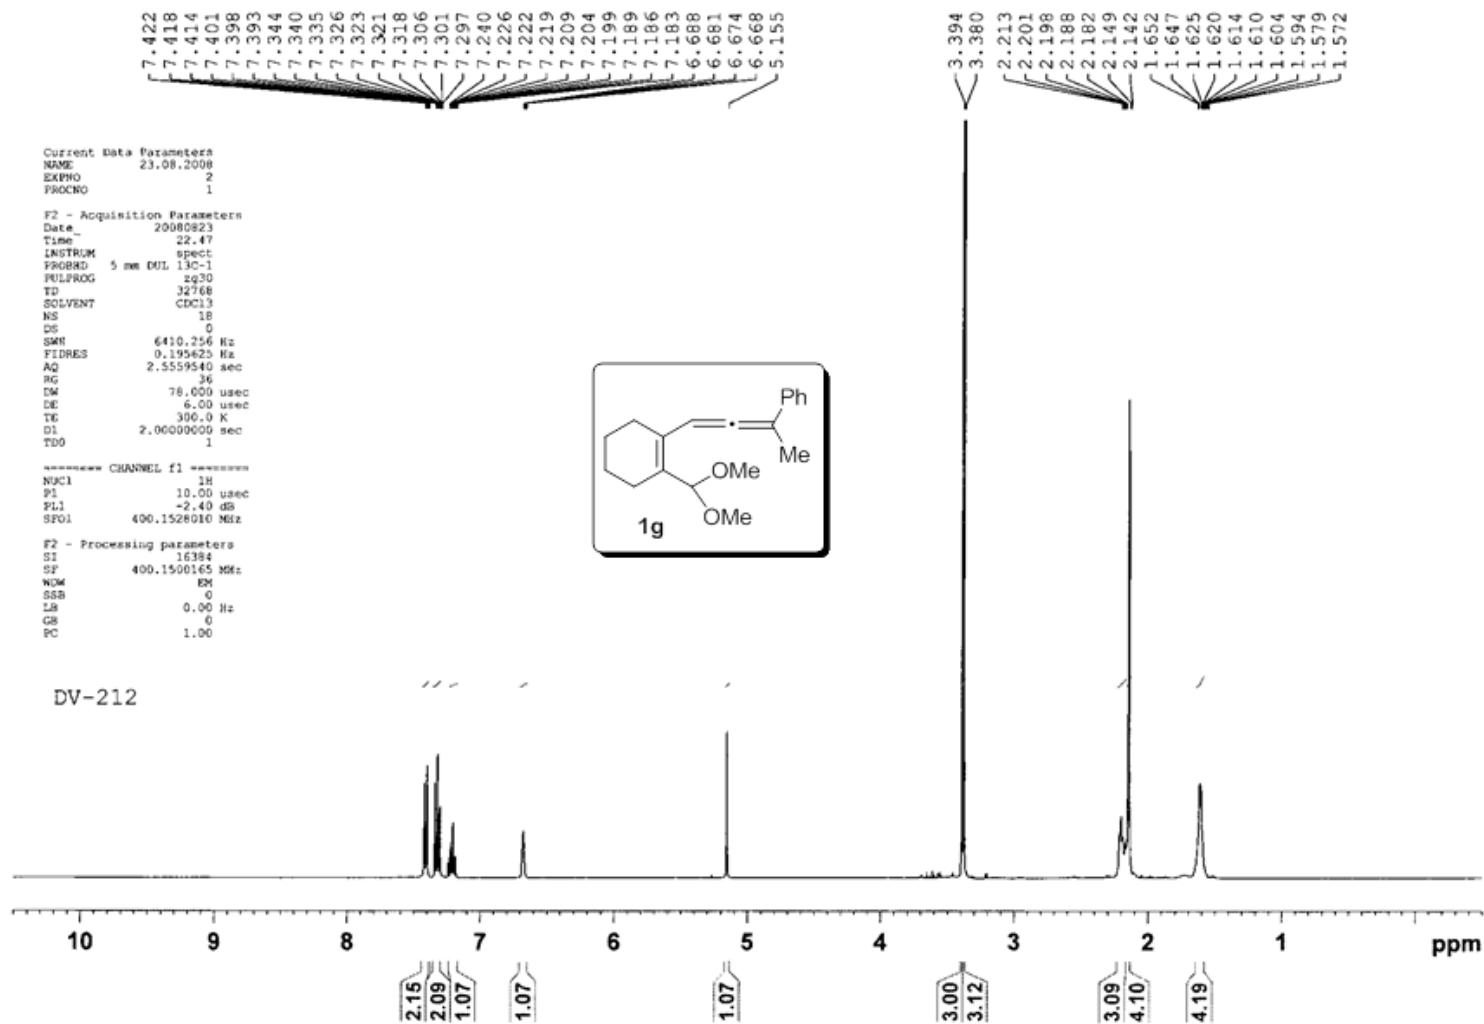

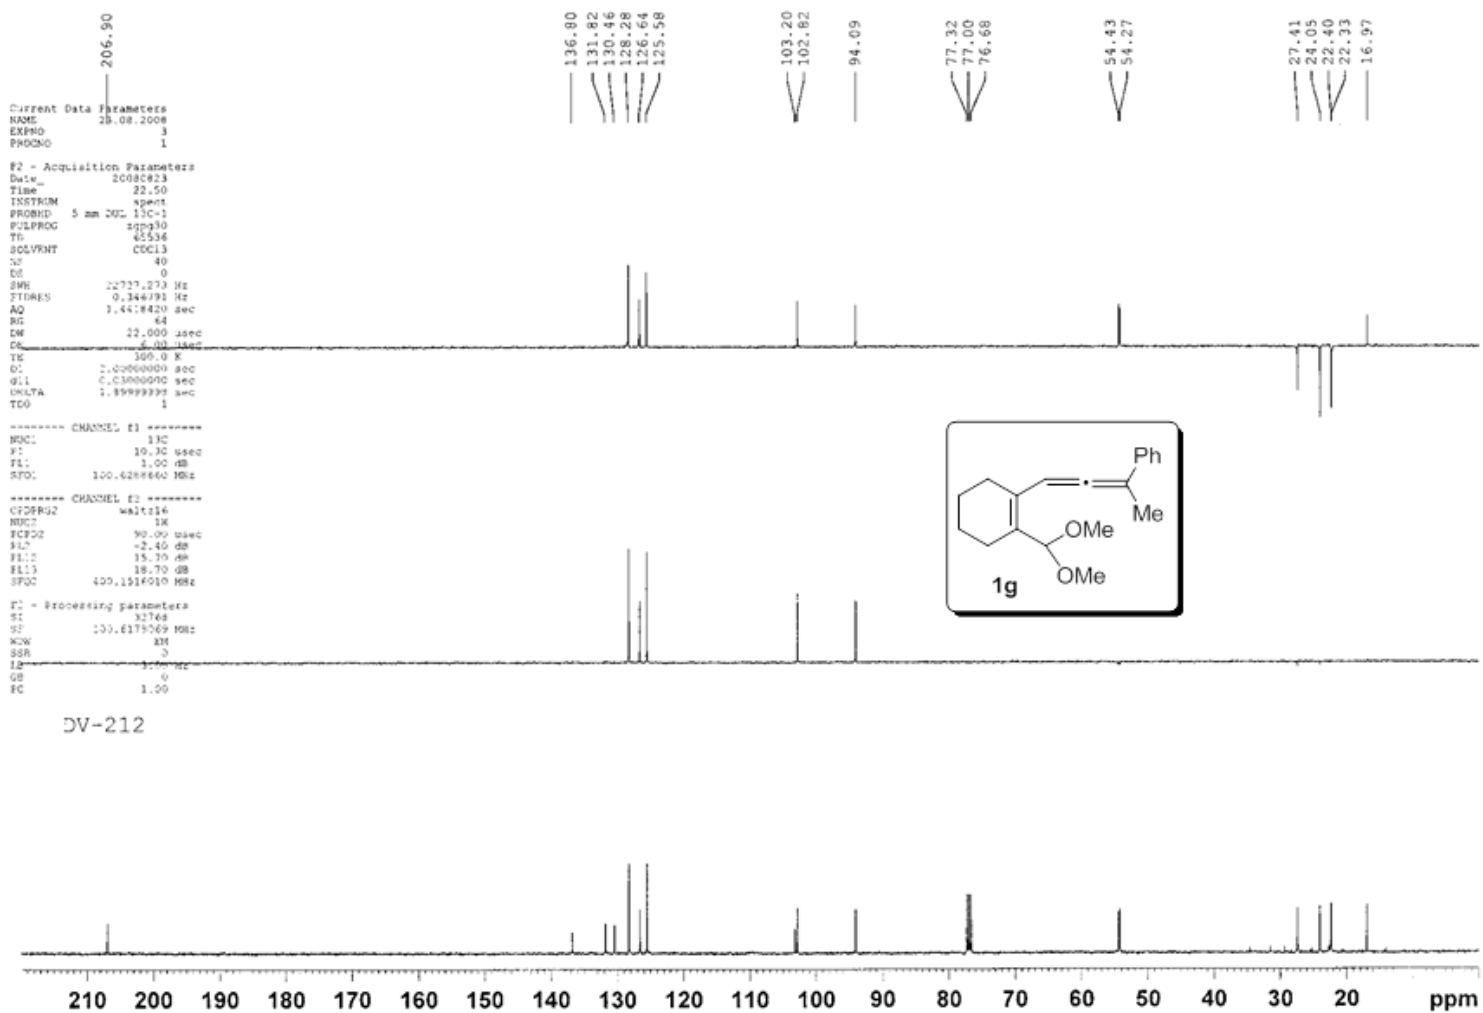

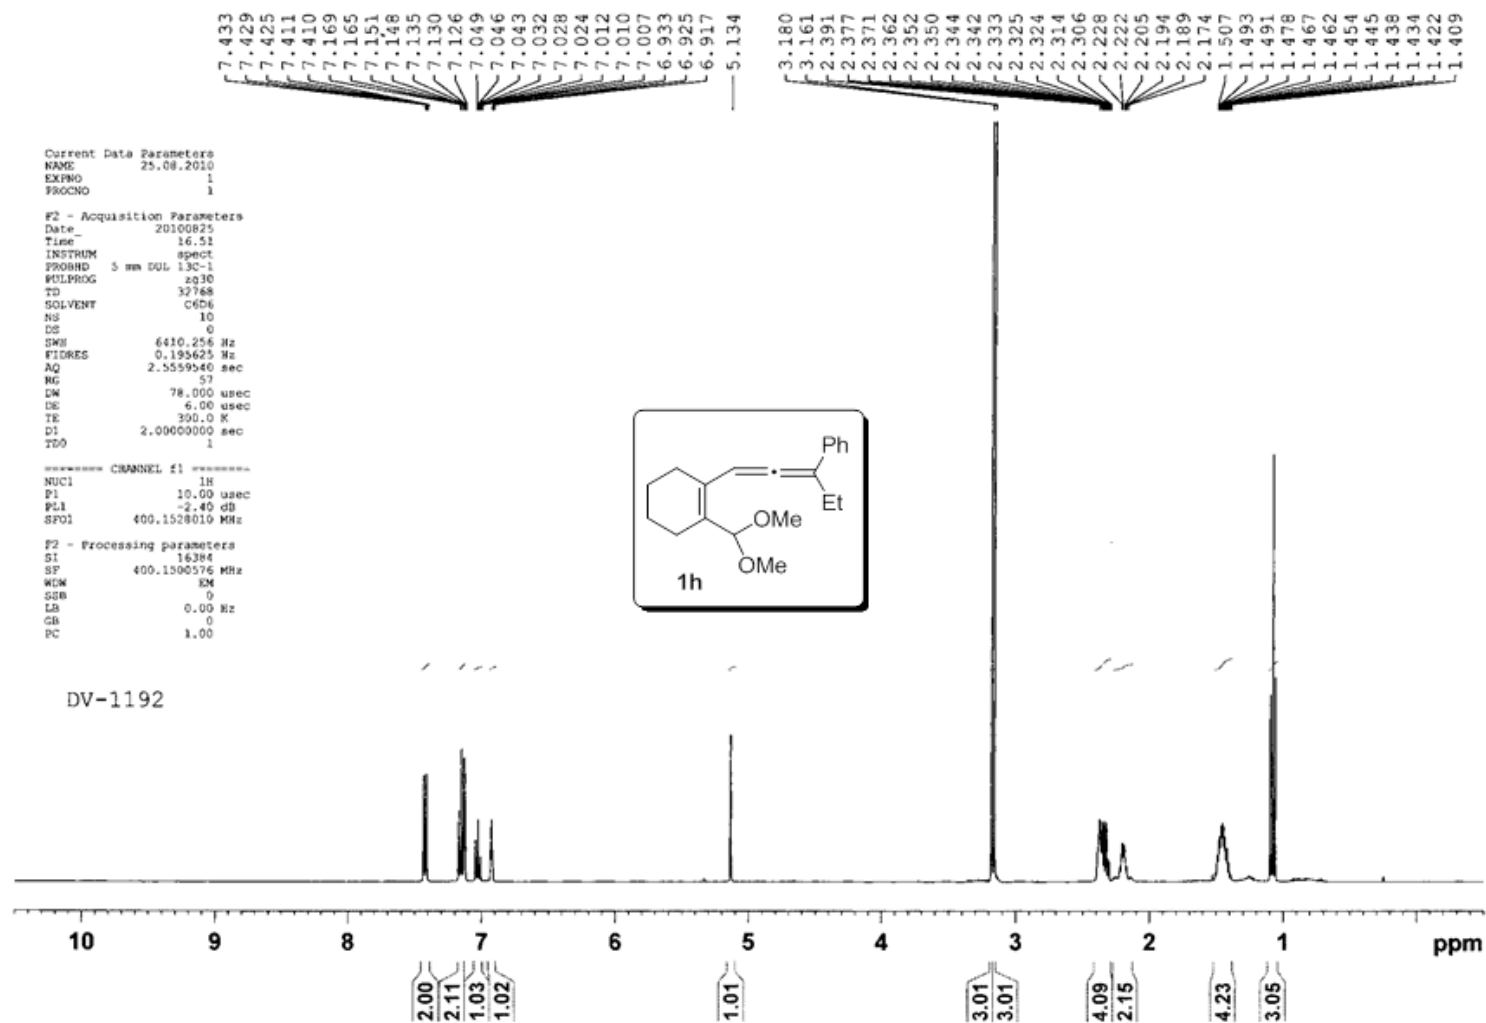



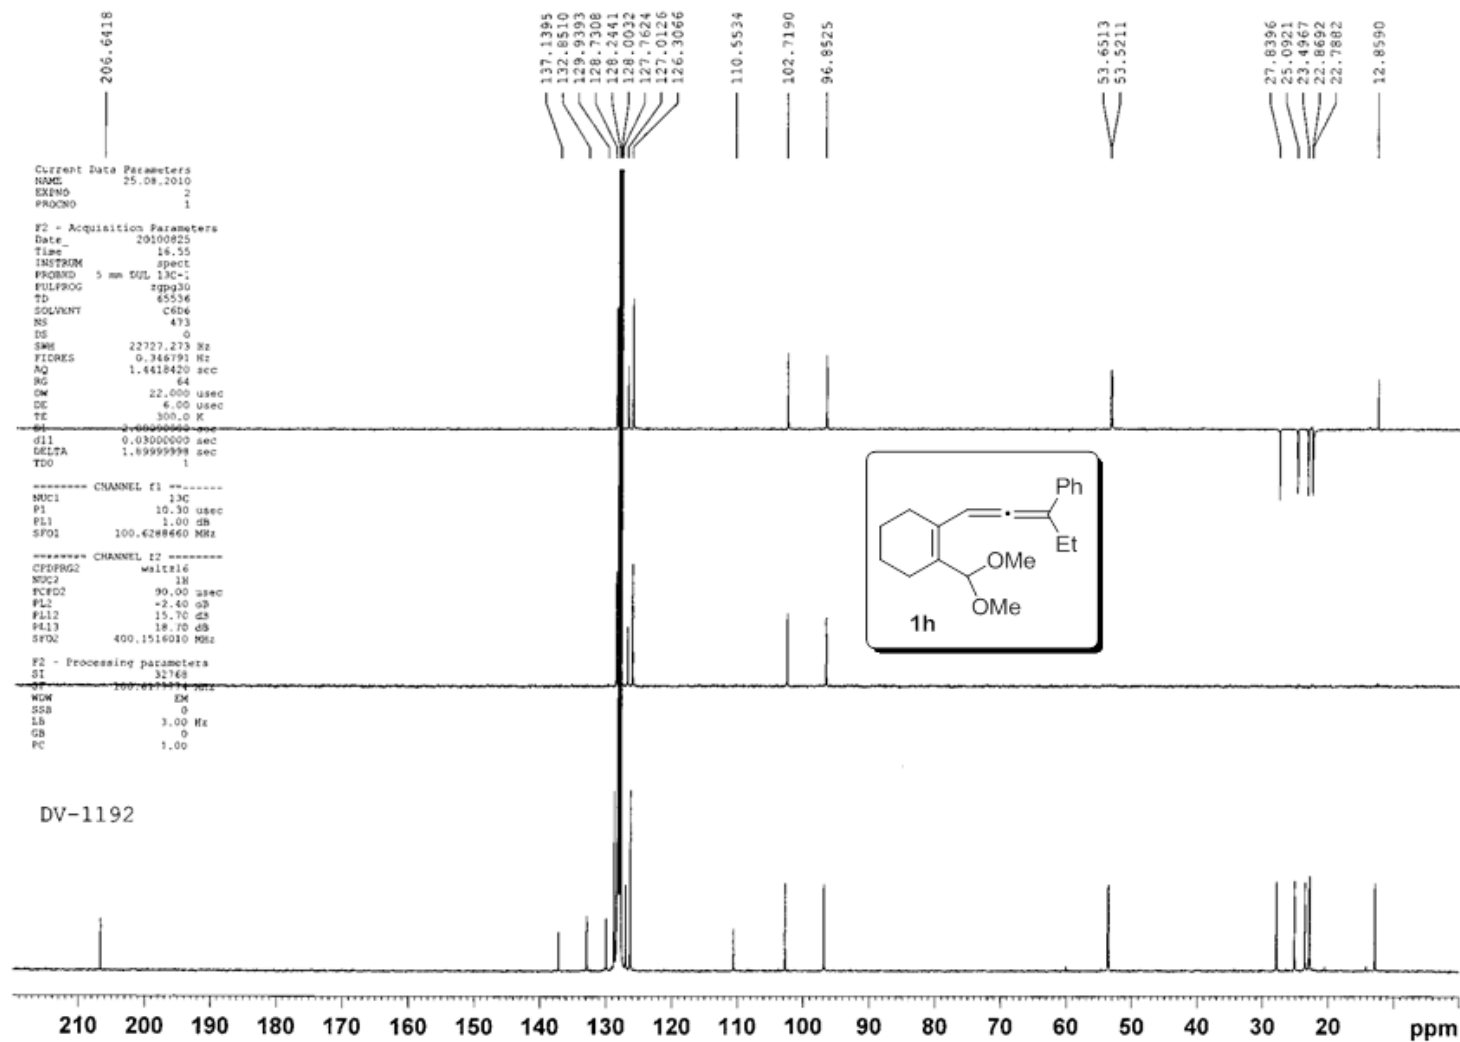

Current Data Parameters  
 NAME 23.07.2011  
 EXPNO 1  
 PROCNO 1

F2 - Acquisition Parameters  
 Date 20110723  
 Time 20.42  
 INSTRUM spect  
 PROBNM 5 mm DUL 13C-1  
 PULPROG zg30  
 TD 32768  
 SOLVENT CDCl3  
 NS 32  
 DS 0  
 SWH 6410.256 Hz  
 FIDRES 0.195625 Hz  
 AQ 2.5559540 sec  
 RG 32  
 CW 78.000 usec  
 DE 6.00 usec  
 TE 300.0 K  
 D1 2.00000000 sec  
 TDO 1

----- CHANNEL f1 -----  
 NUC1 1H  
 P1 10.00 usec  
 PL1 -2.40 dB  
 SFO1 400.1528010 MHz

F2 - Processing parameters  
 SI 16384  
 SF 400.1500168 MHz  
 WDW EM  
 SSB 0  
 LB 0.00 Hz  
 GB 0  
 PC 1.00

DV-1451

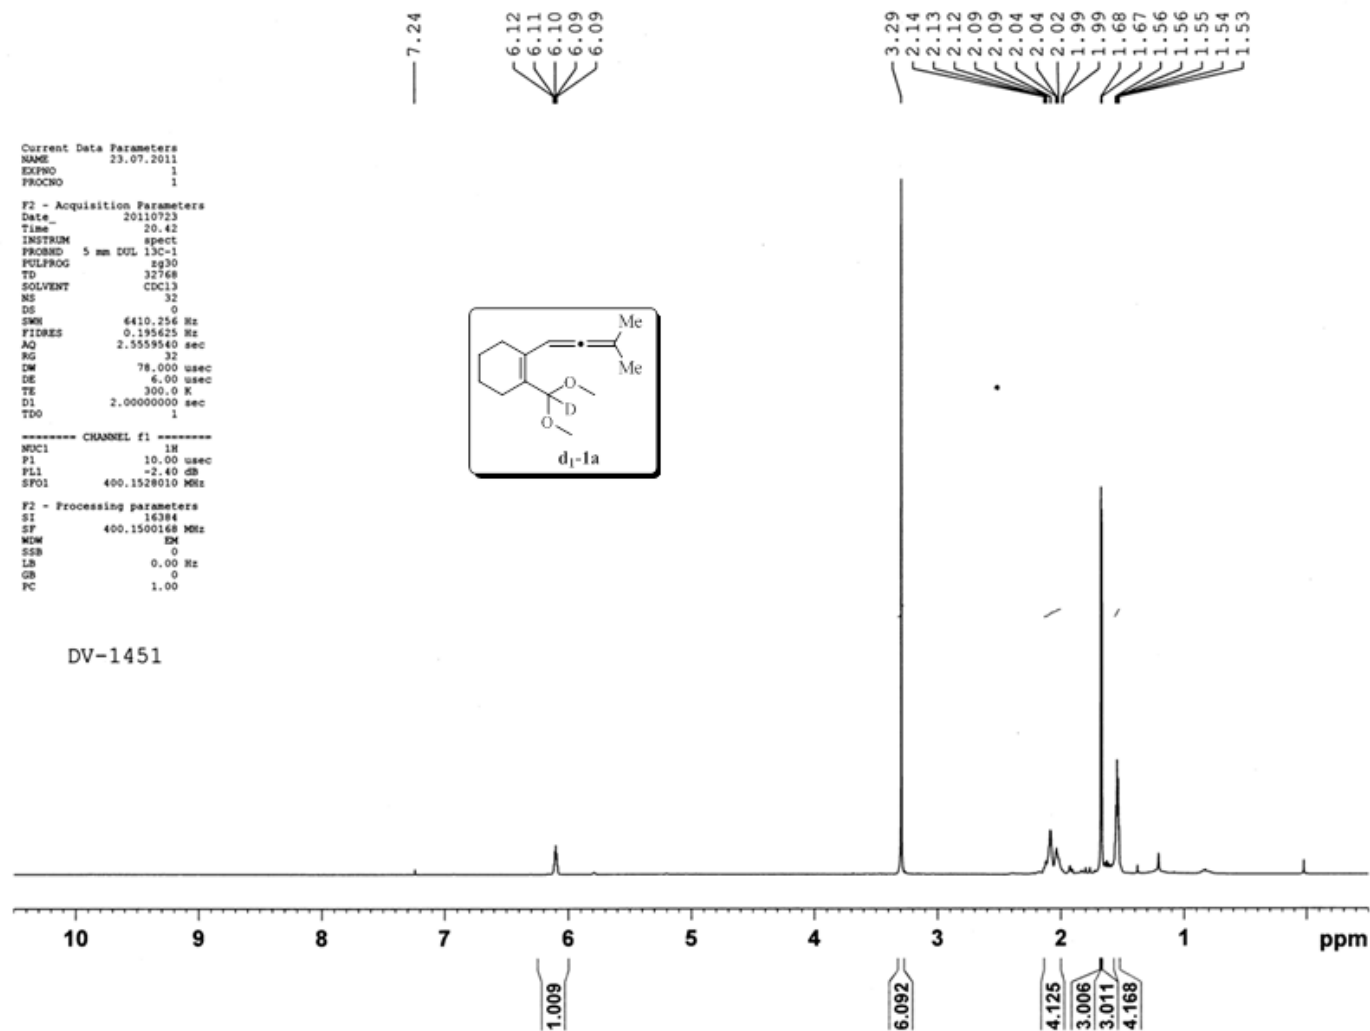

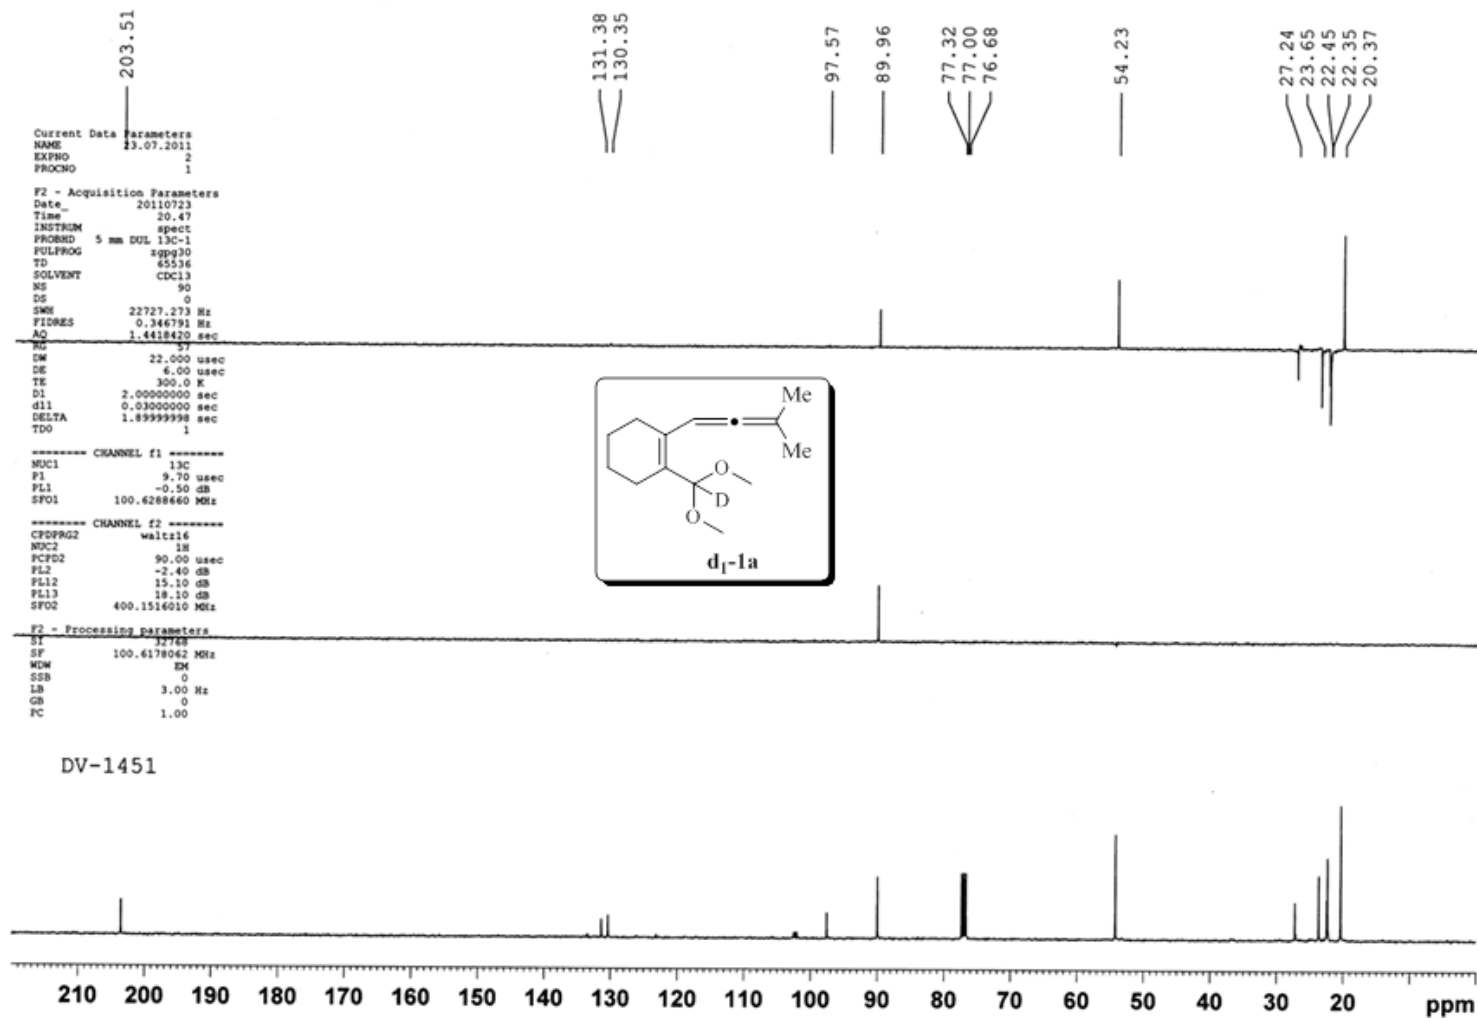

Current Data Parameters  
 NAME 13.20.2008  
 EXPNO 1  
 PROCNO 1

F2 - Acquisition Parameters  
 Date\_ 20081013  
 Time 20.11  
 INSTRUM spect  
 PROBHD 5 mm DUL 13C-1  
 PULPROG zg30  
 TD 32768  
 SOLVENT CDCl3  
 NS 58  
 DS 0  
 SWH 6410.256 Hz  
 FIDRES 0.195625 Hz  
 AQ 2.5559540 sec  
 RG 57  
 DM 78.000 usec  
 DE 6.00 usec  
 TE 300.0 K  
 D1 2.00000000 sec  
 TDO 1

----- CHANNEL f1 -----  
 NUC1 1H  
 P1 10.80 usec  
 PL1 -2.40 dB  
 SFO1 400.1528010 MHz

F2 - Processing parameters  
 SI 16384  
 SF 400.1500164 MHz  
 WDW EM  
 SSB 0  
 LB 0.00 Hz  
 GB 0  
 PC 1.00

DV-284

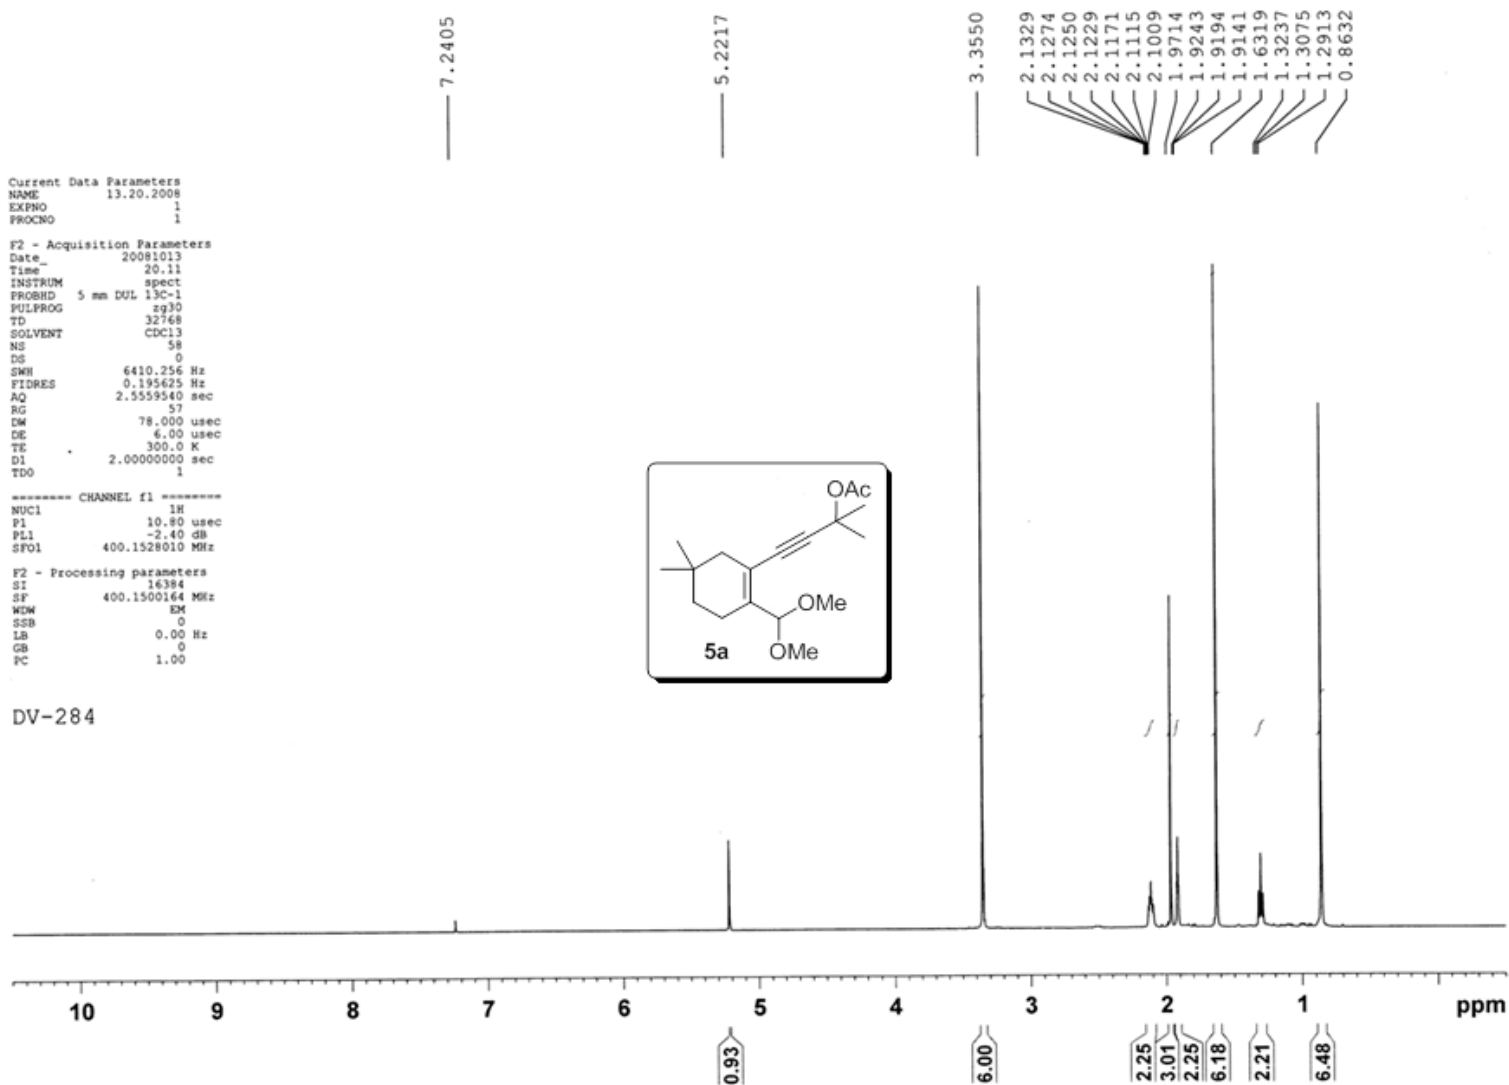

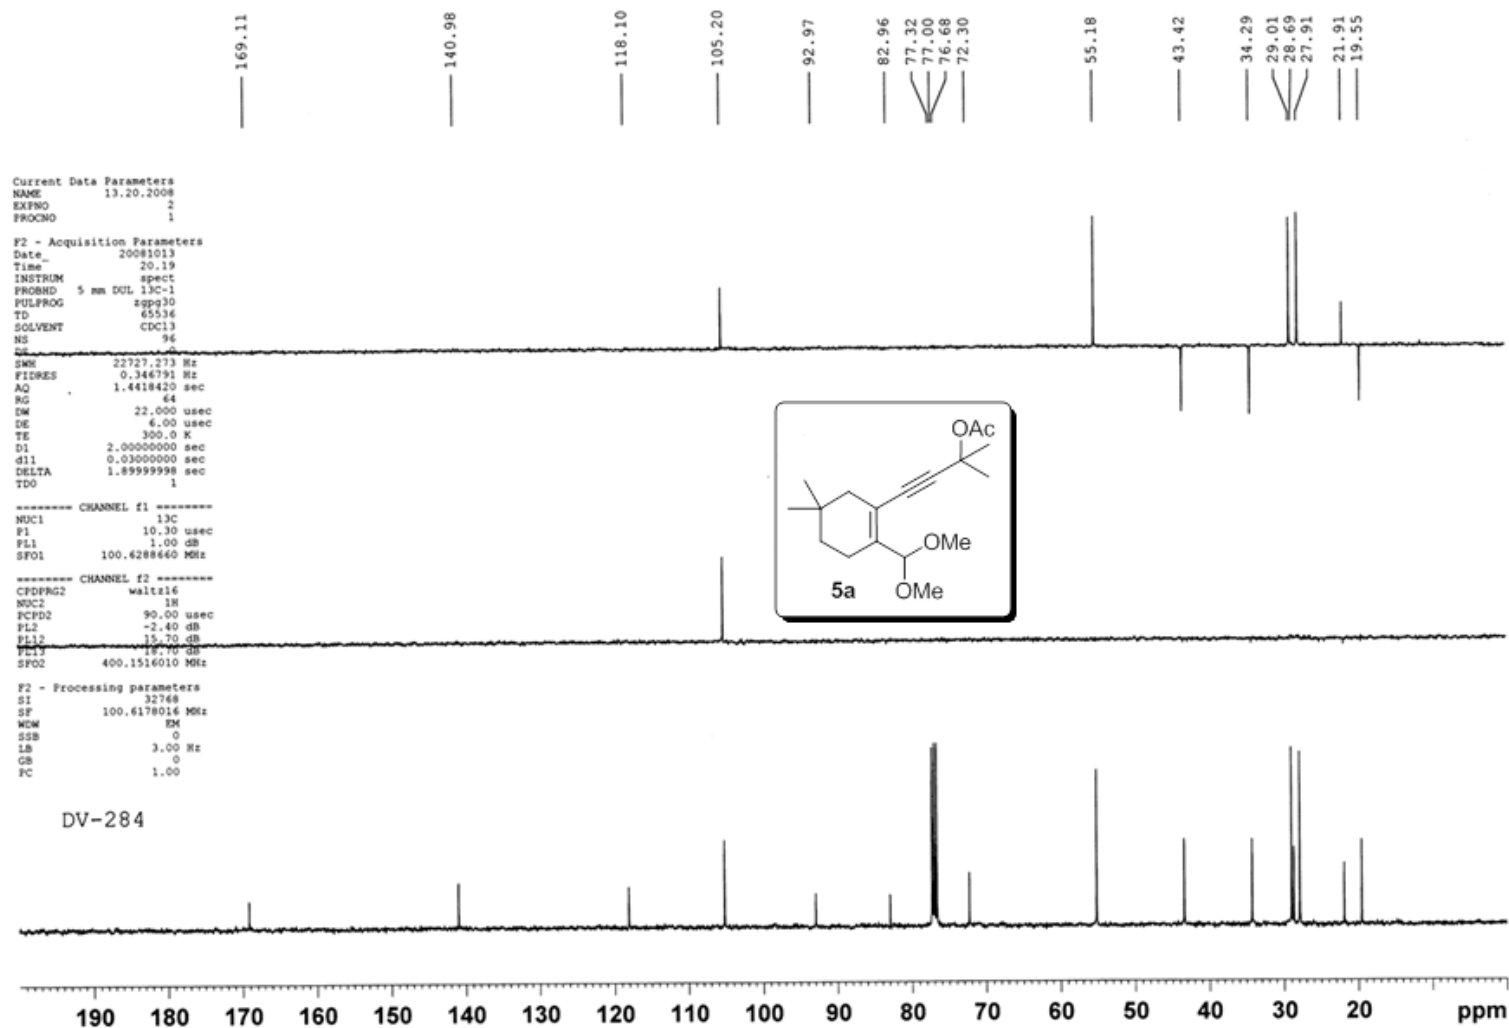

Current Data Parameters  
 NAME 12.09.2010  
 EXPNO 1  
 PROCNO 1

F2 - Acquisition Parameters  
 Date\_ 20100812  
 Time 12.31  
 INSTRUM spect  
 PROBRD 5 mm DUL 13C-1  
 PULPROG zg30  
 TD 32768  
 SOLVENT C6D6  
 NS 12  
 DS 0  
 SWH 6410.256 Hz  
 FIDRES 0.199625 Hz  
 AQ 2.5559540 sec  
 RG 71.8  
 DM 78.000 usec  
 DE 6.00 usec  
 TE 300.0 K  
 D1 2.00000000 sec  
 YD0 1

===== CHANNEL f1 =====  
 NUC1 1H  
 P1 10.00 usec  
 PL1 -2.40 dB  
 SFO1 400.1528010 MHz

F2 - Processing parameters  
 SI 16384  
 SF 400.1500478 MHz  
 WDW EM  
 SSB 0  
 LB 0.00 Hz  
 GB C  
 PC 1.00

DV-1171

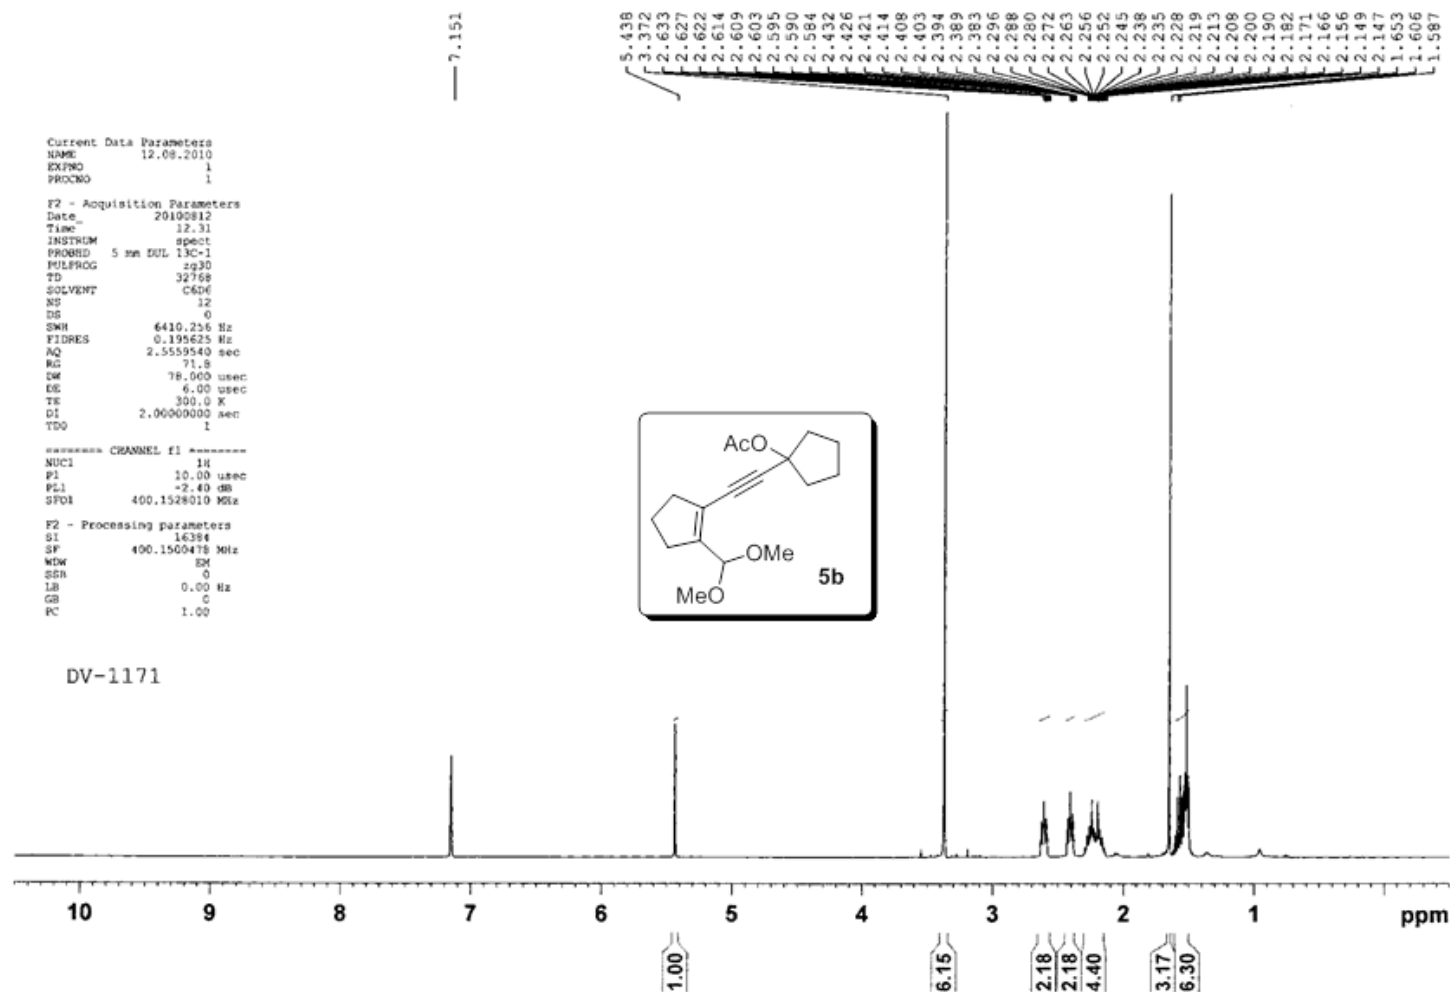

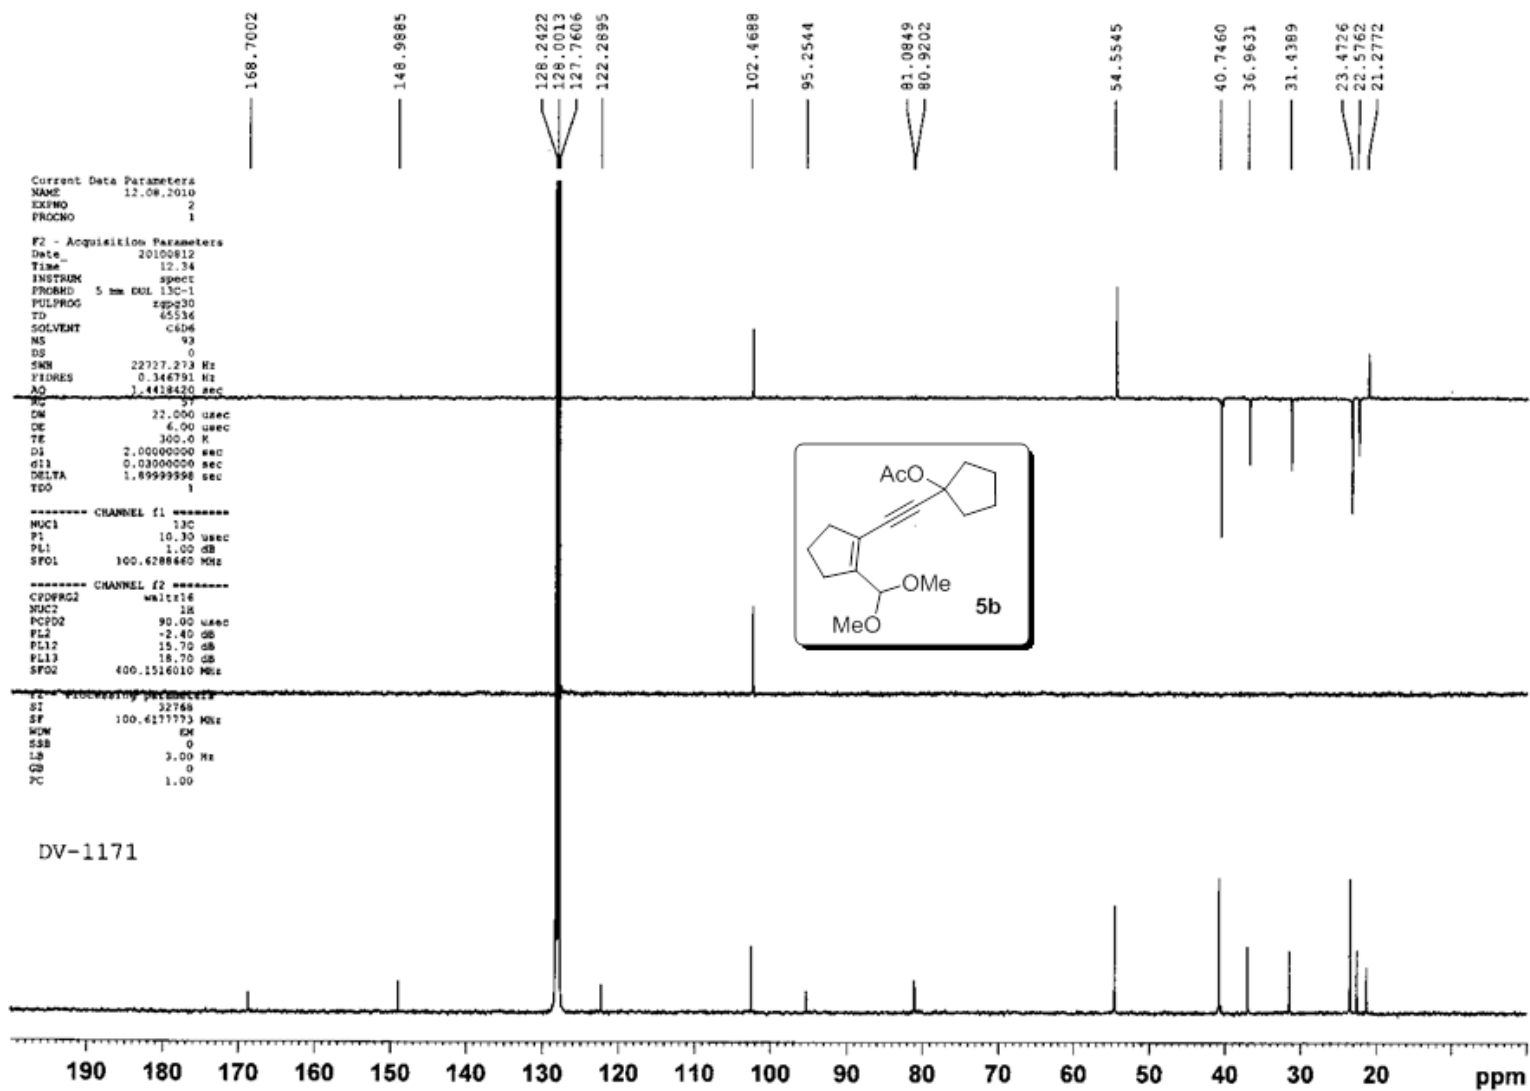

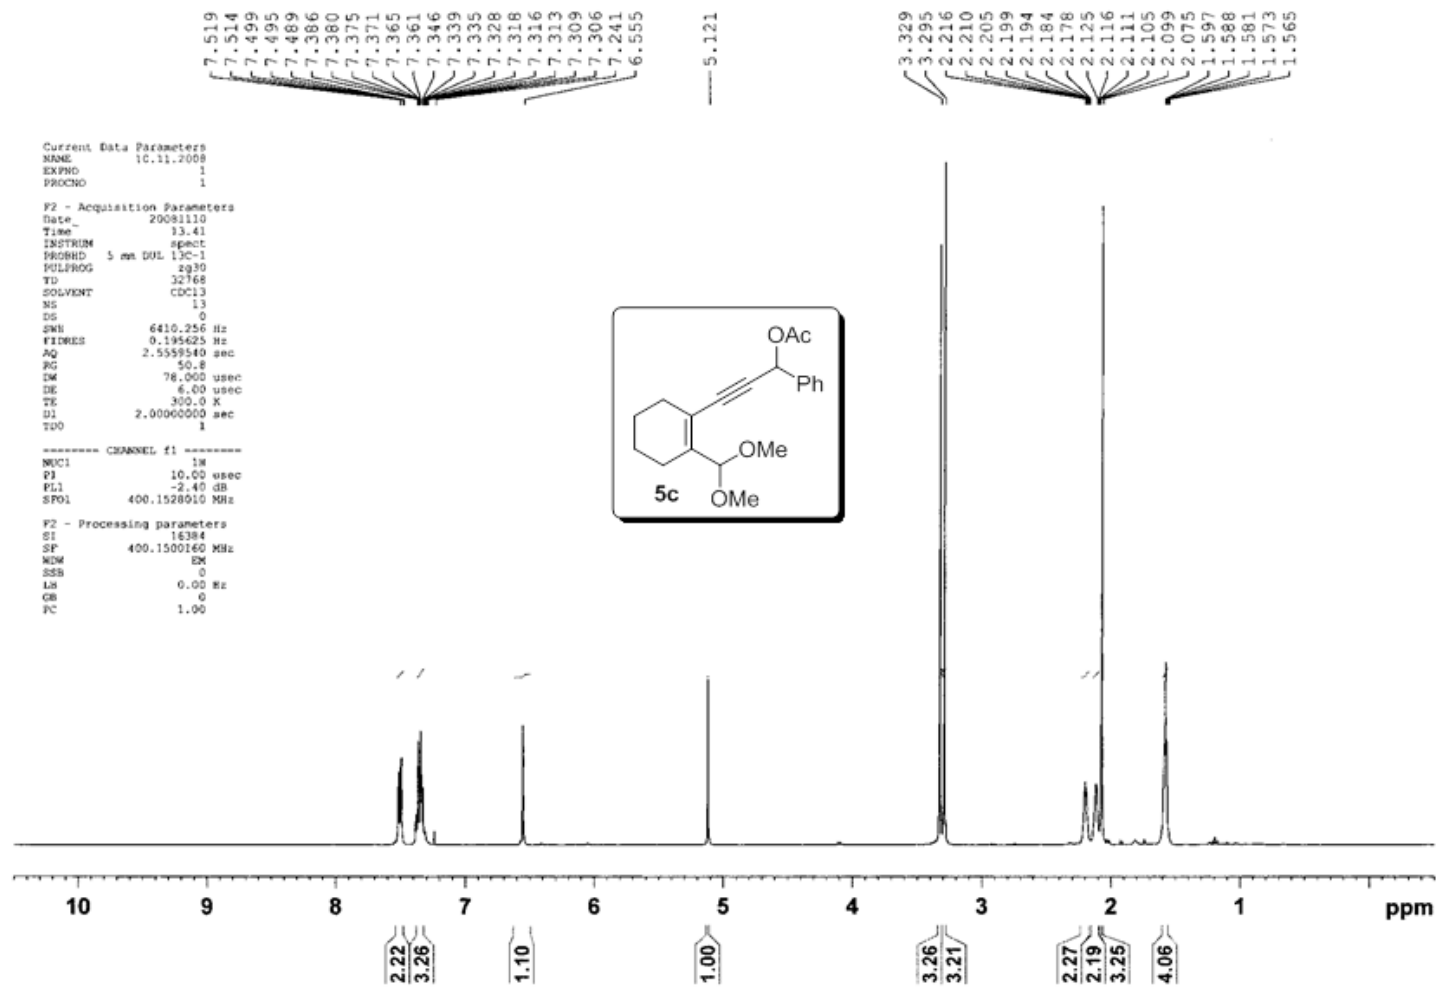



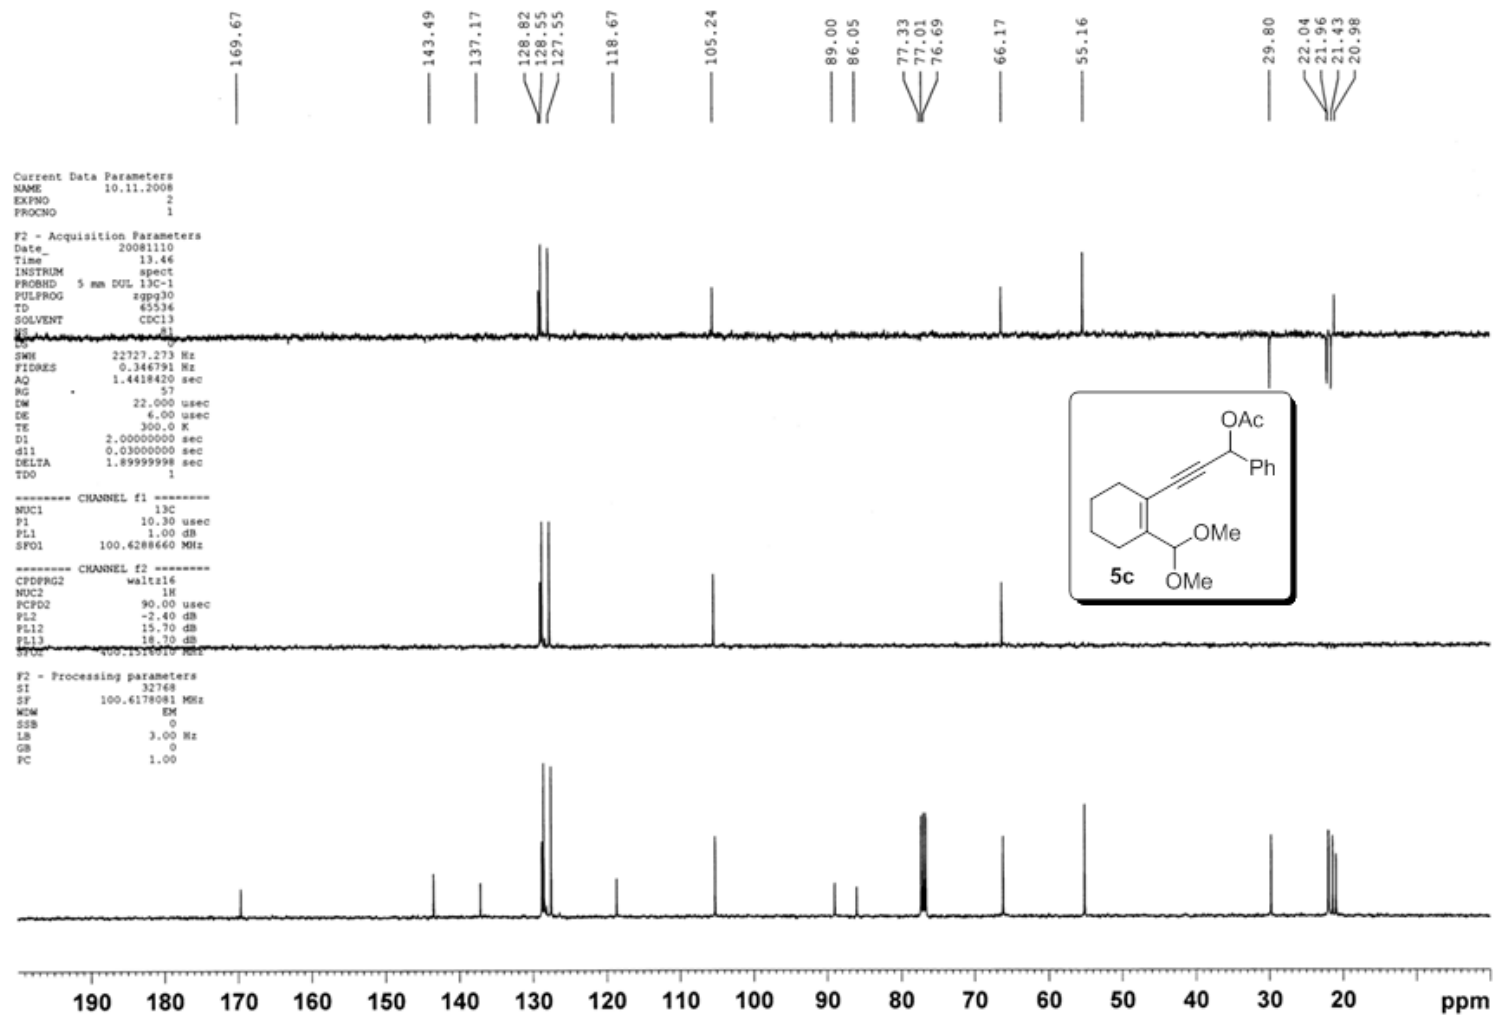

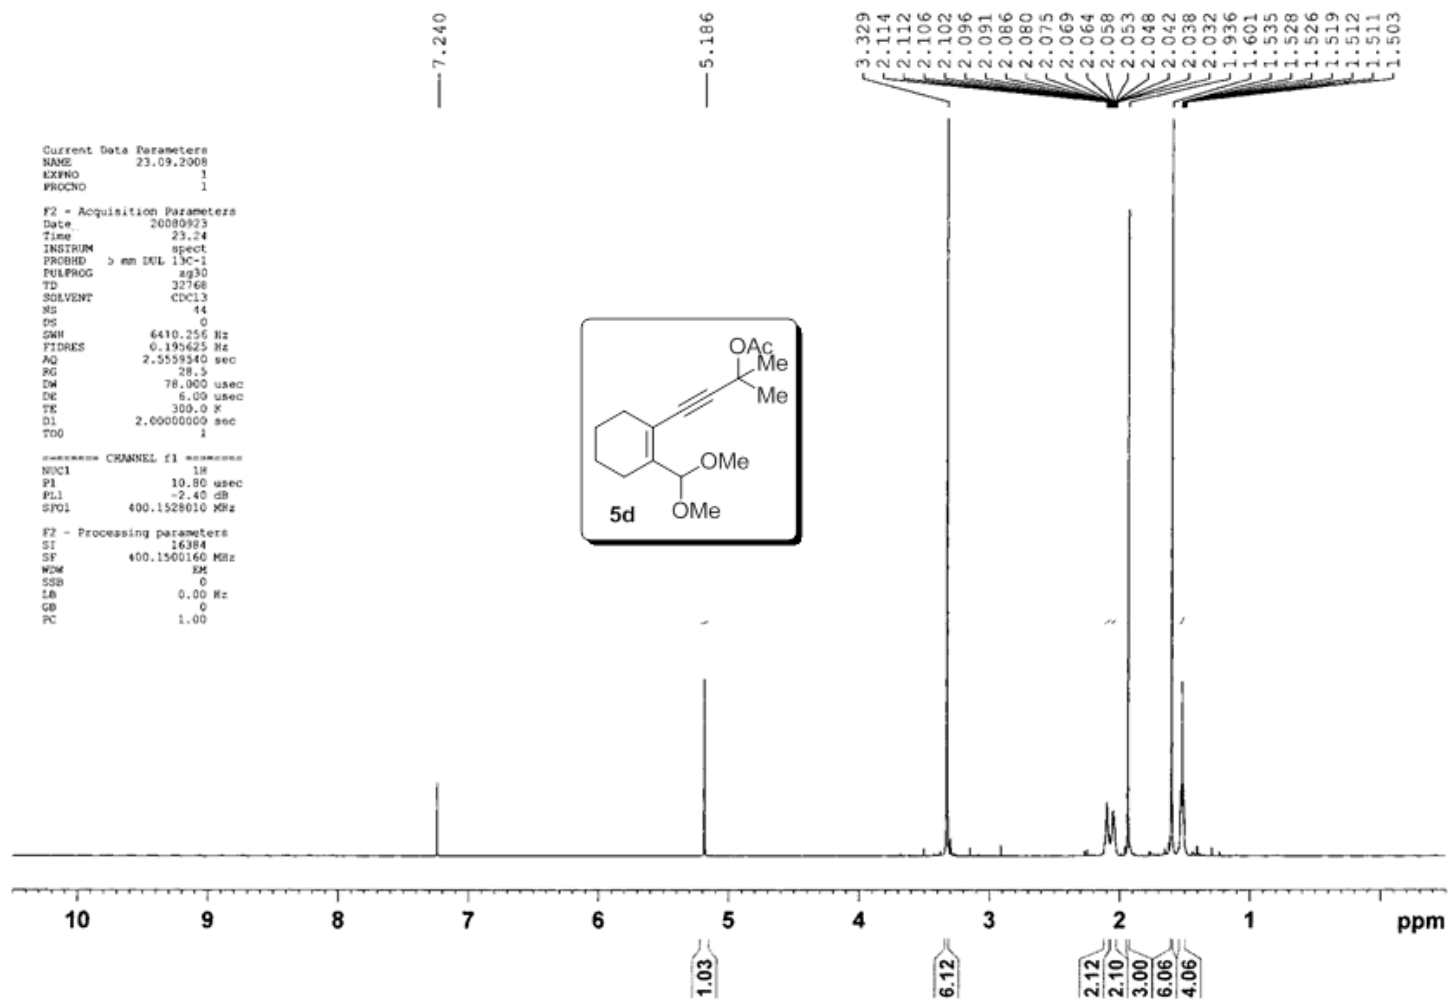

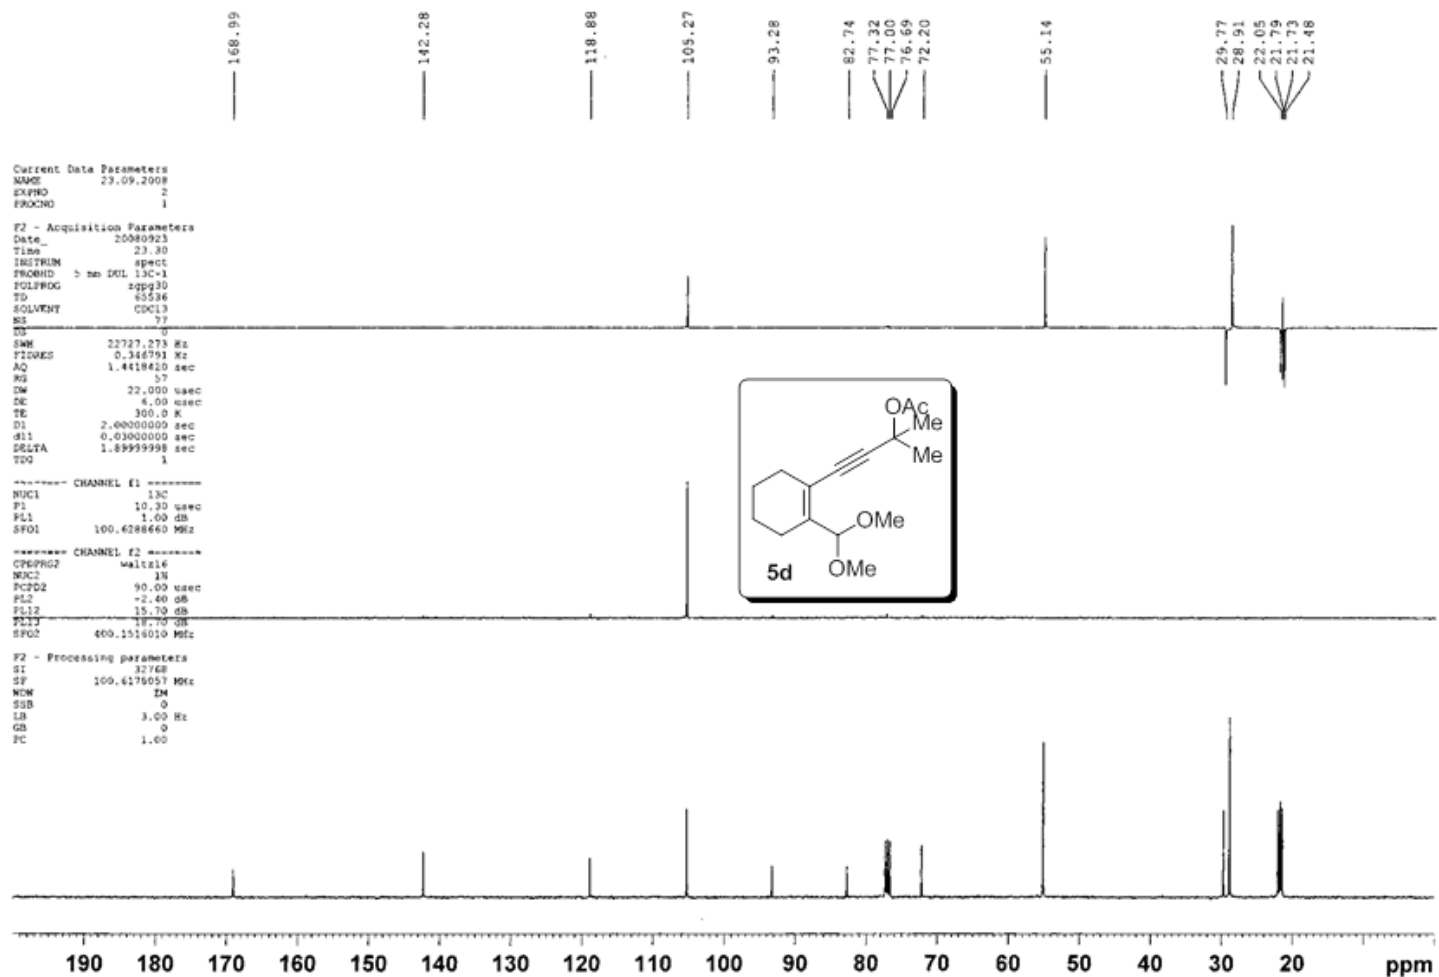

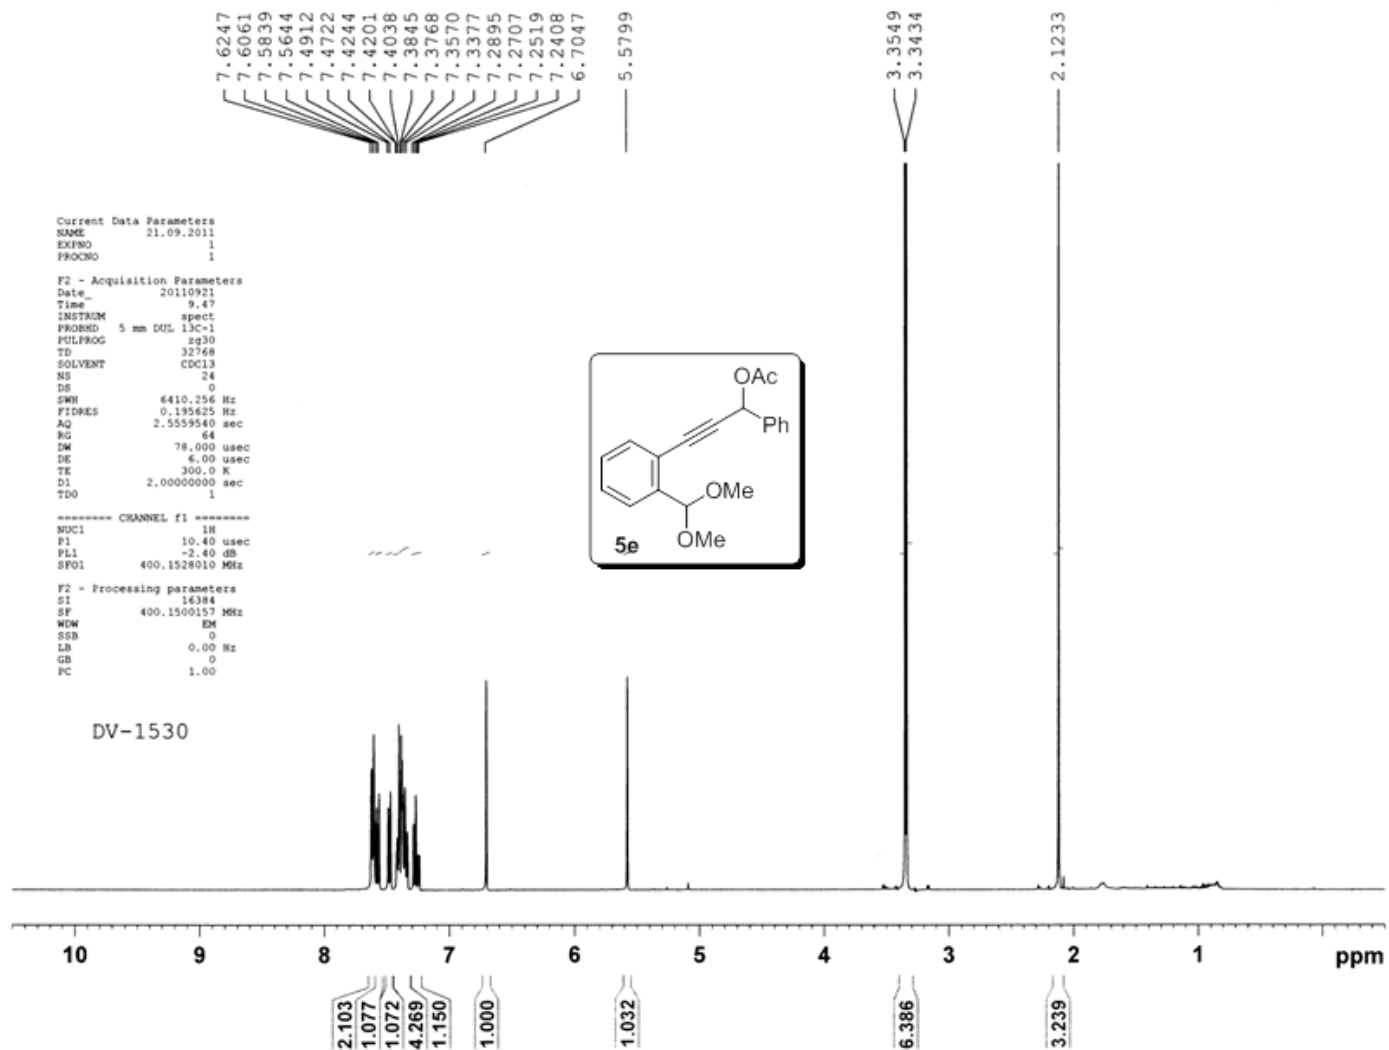

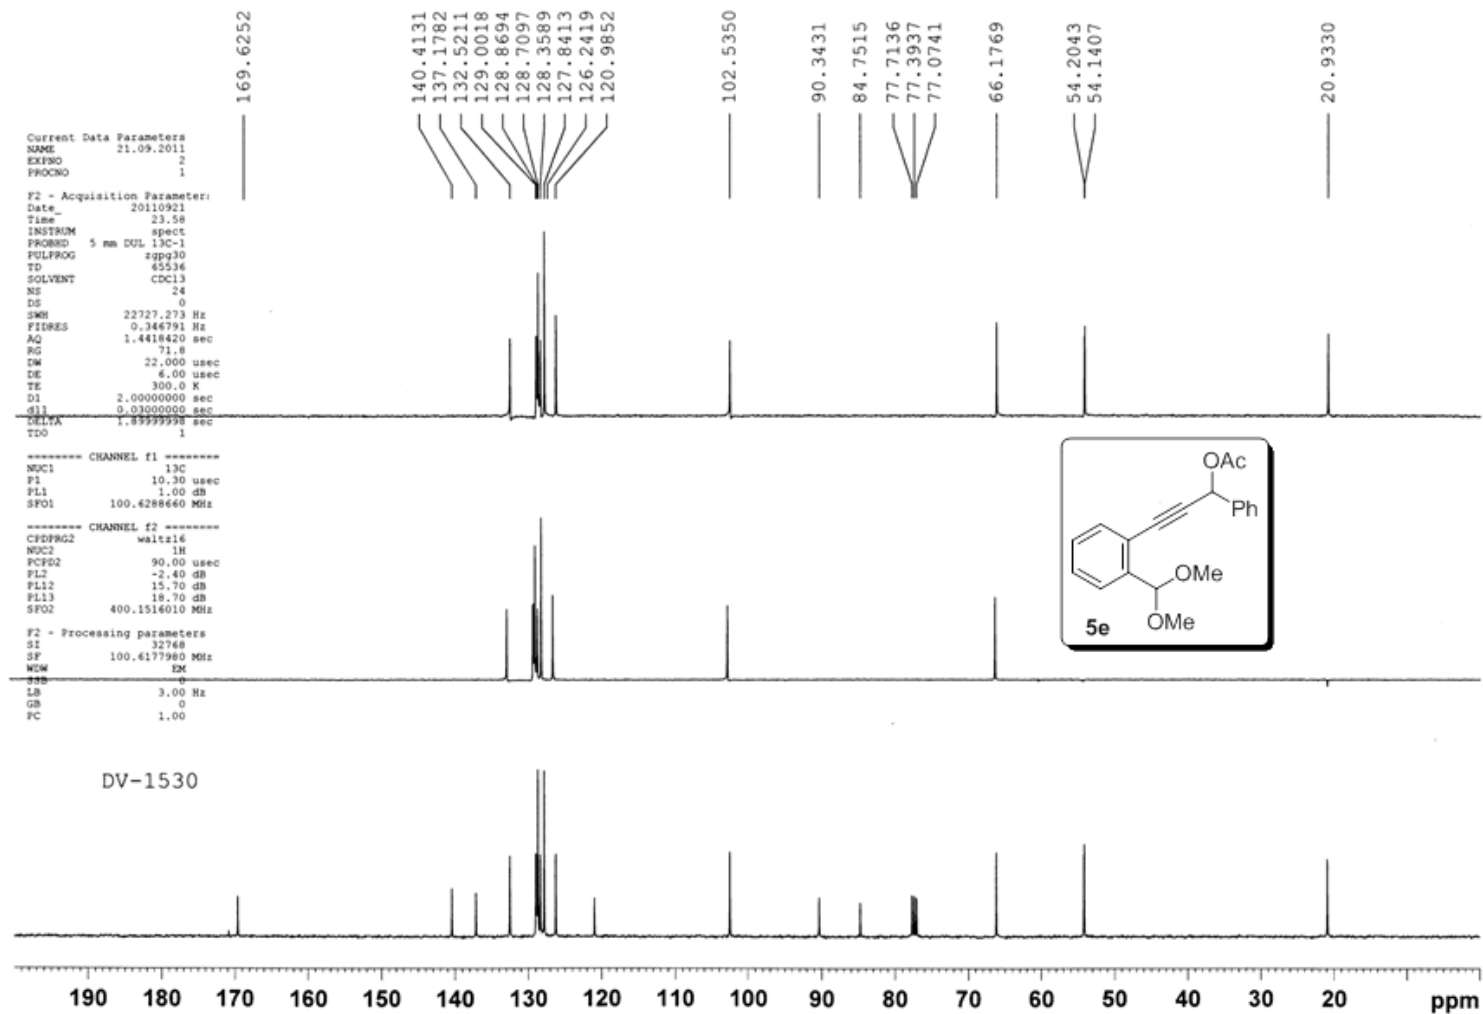

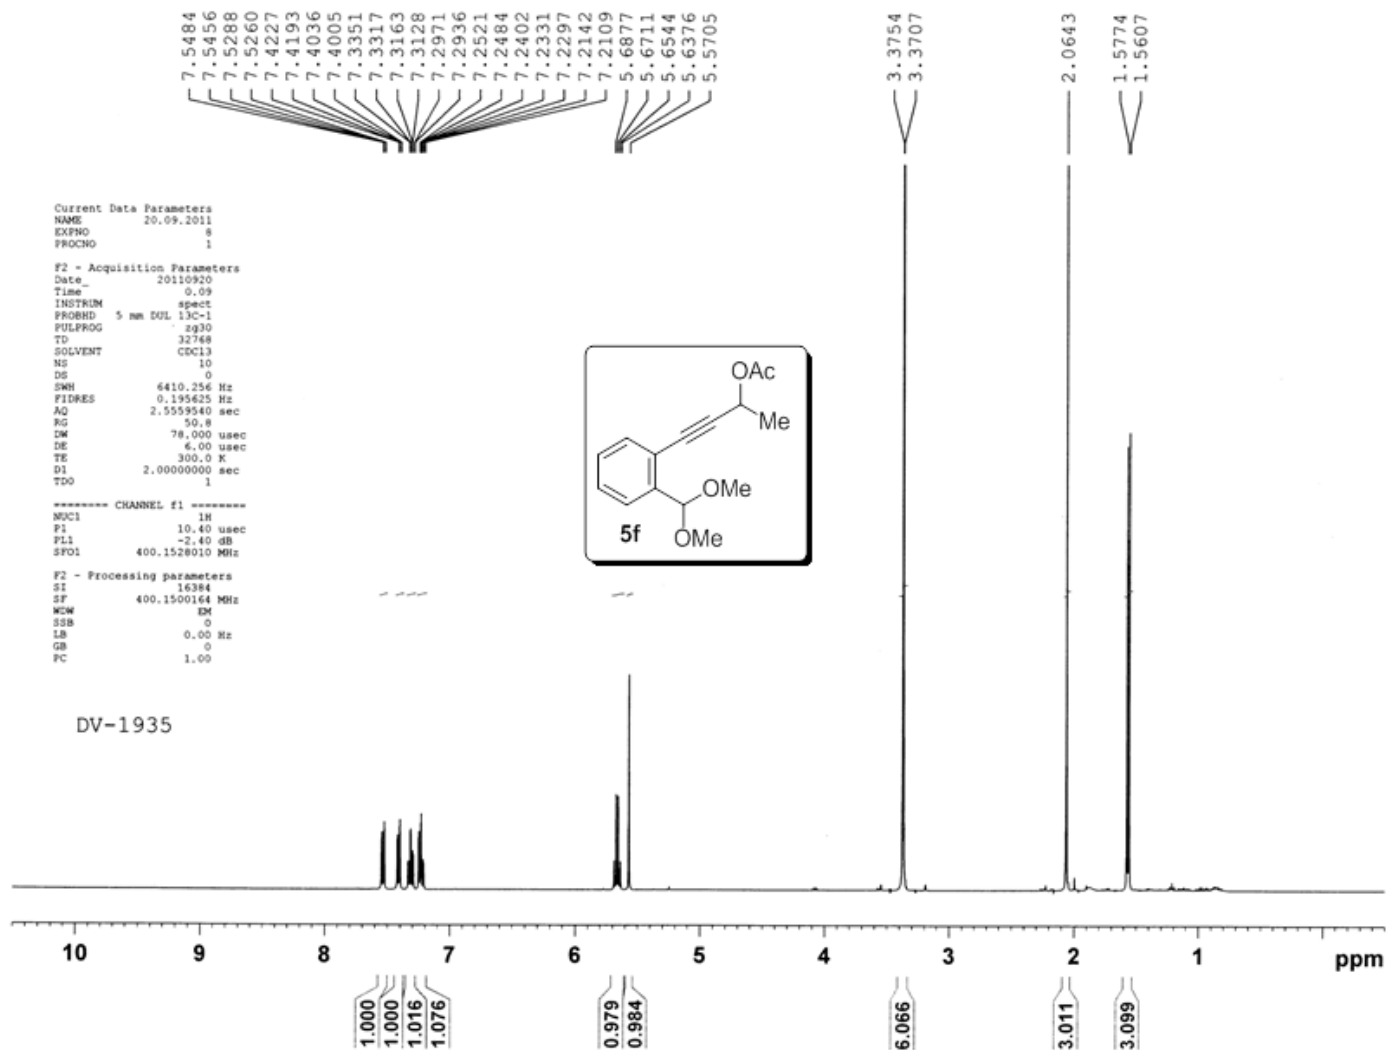

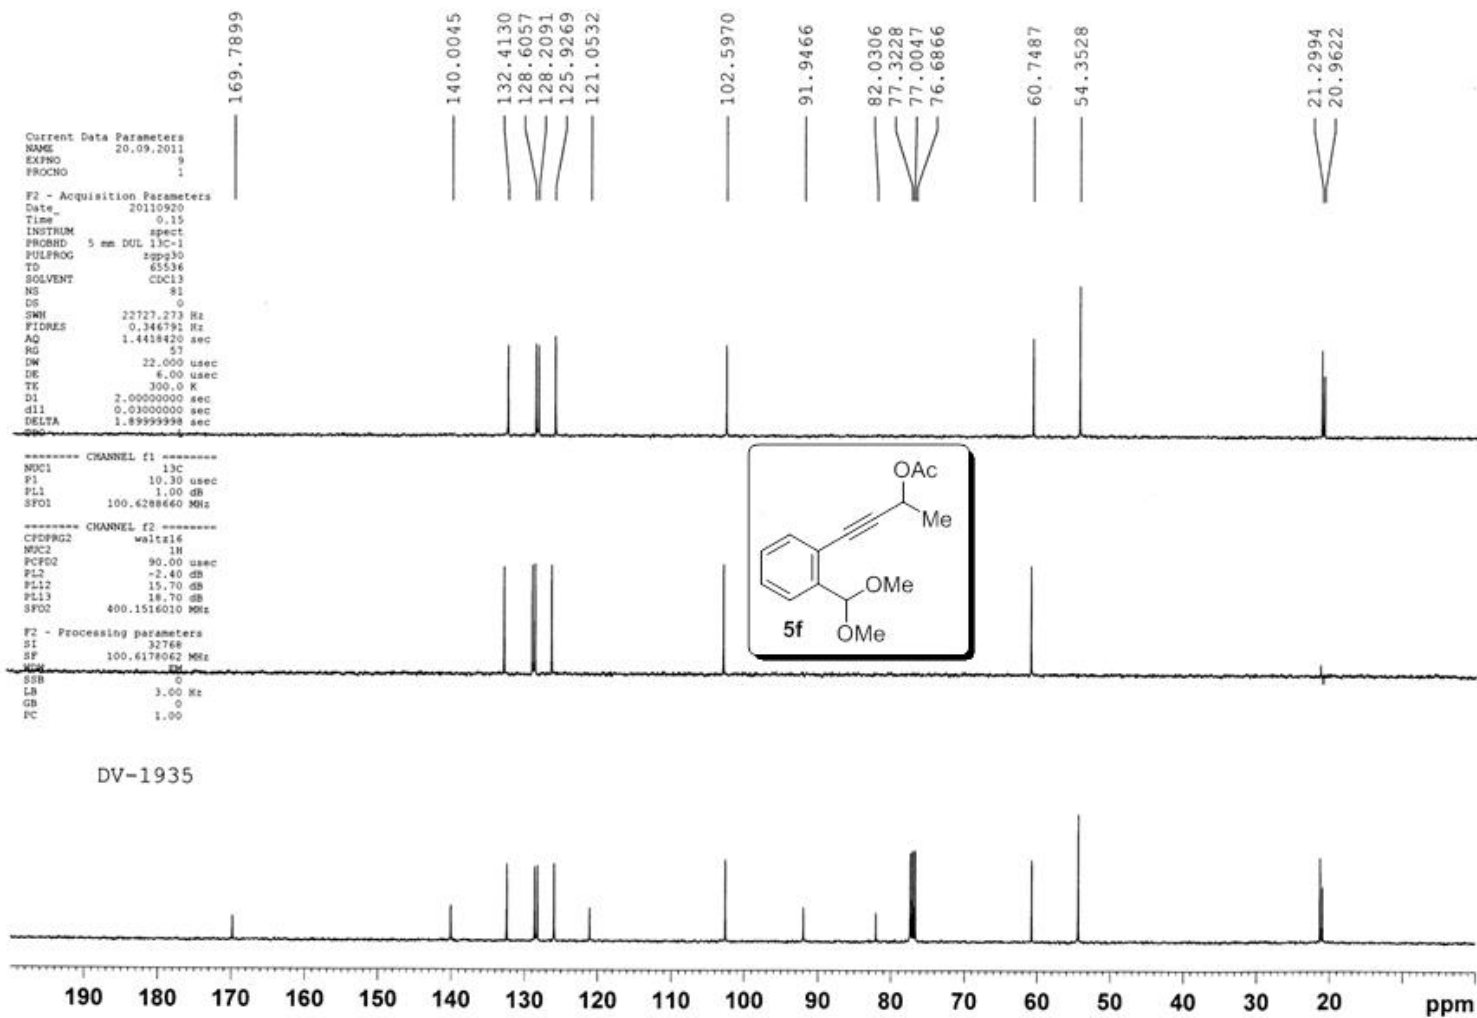

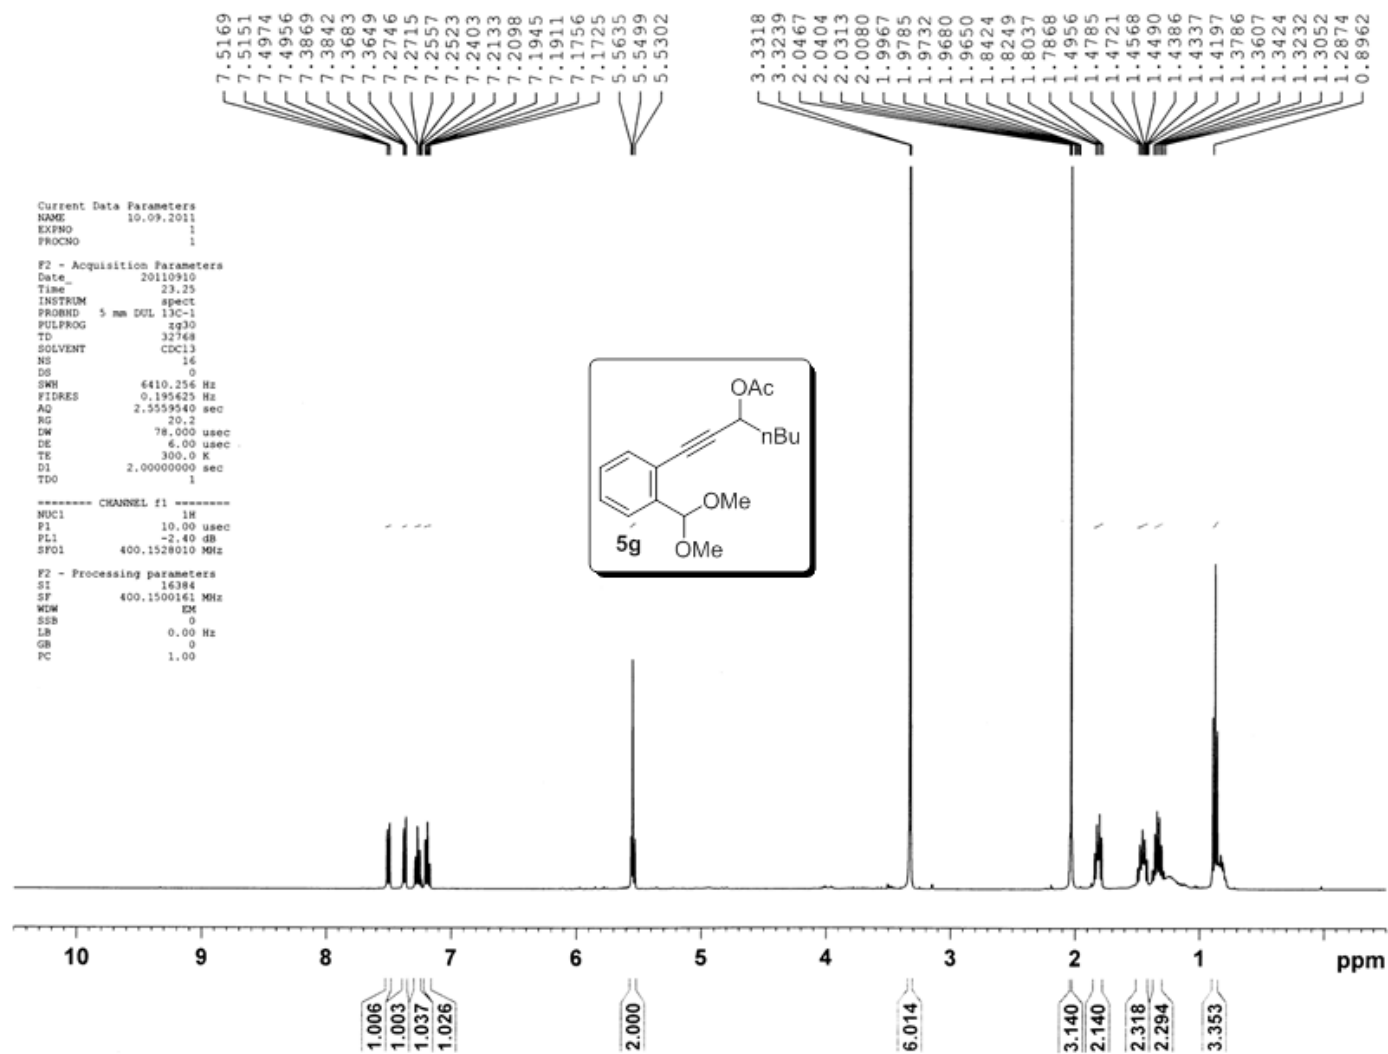



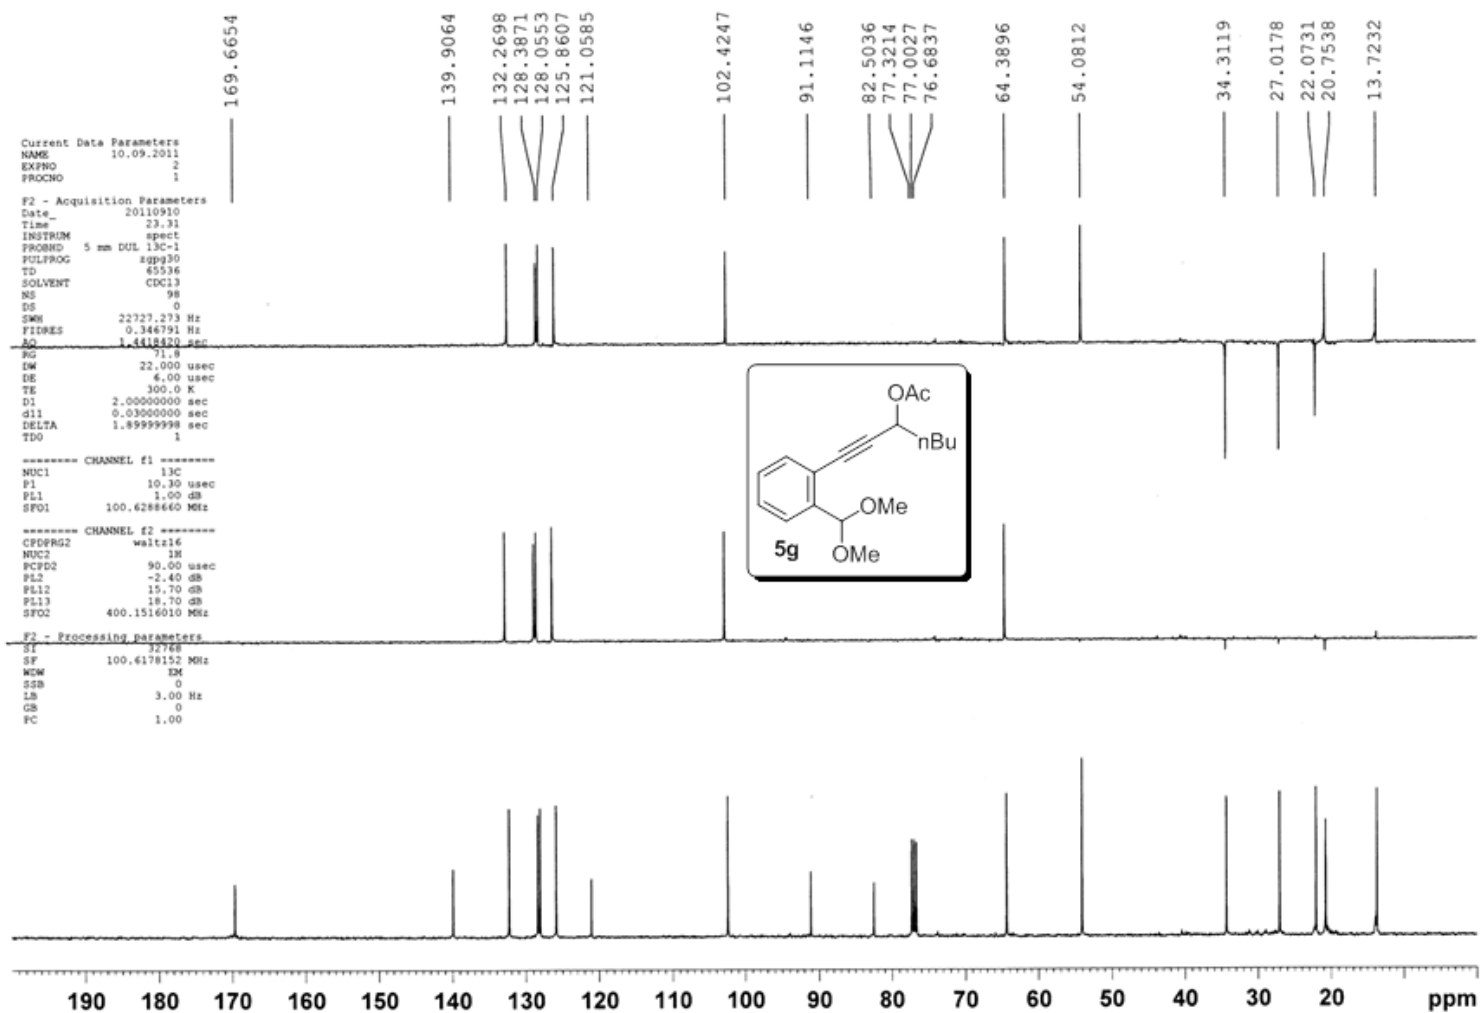

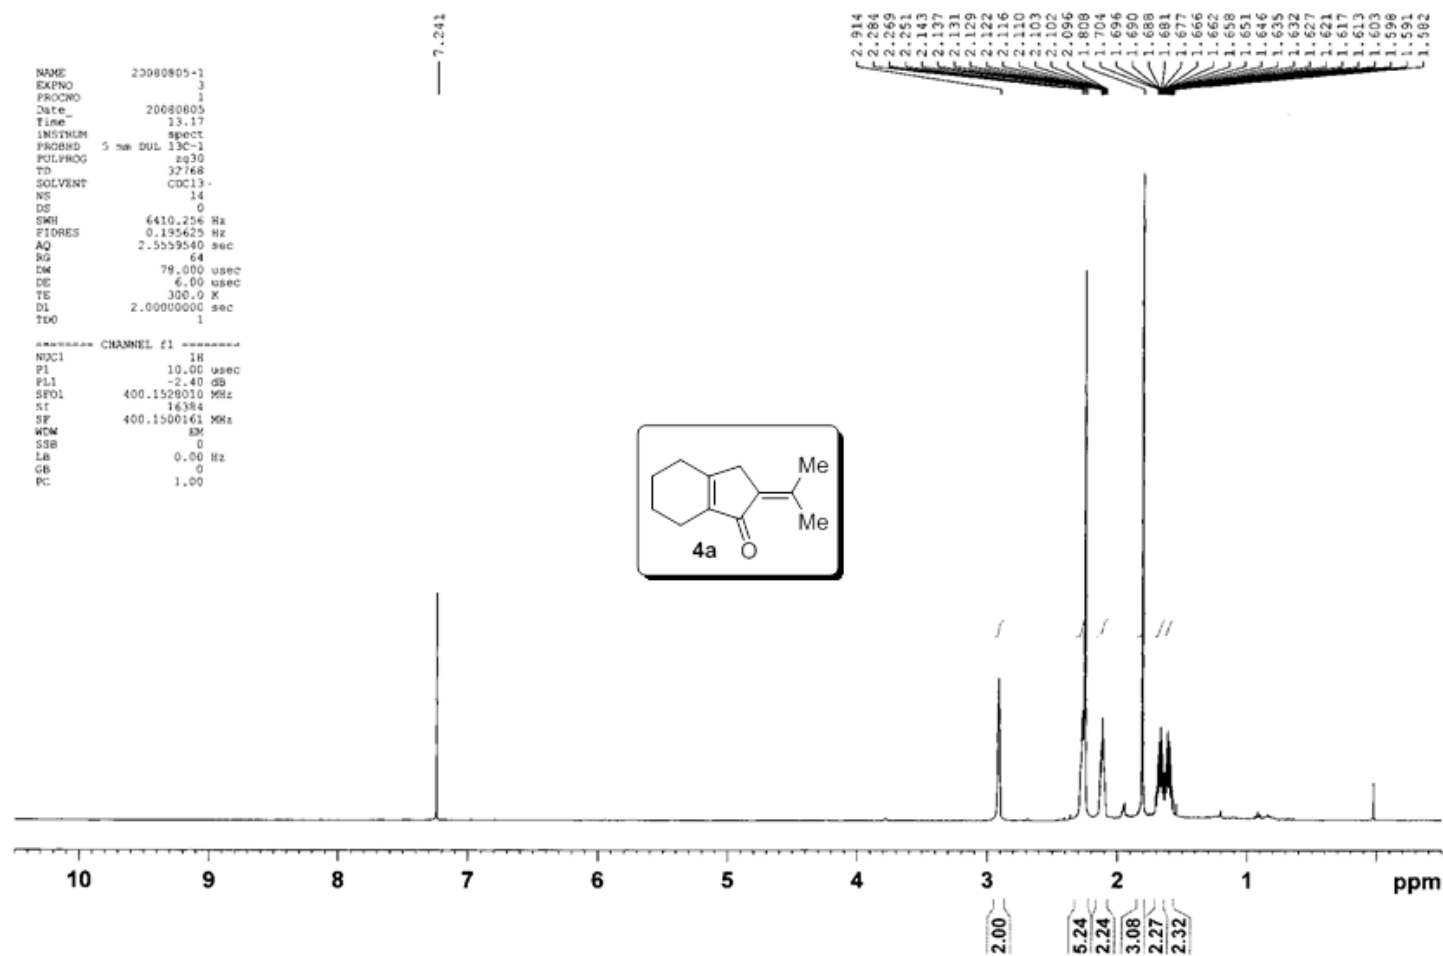

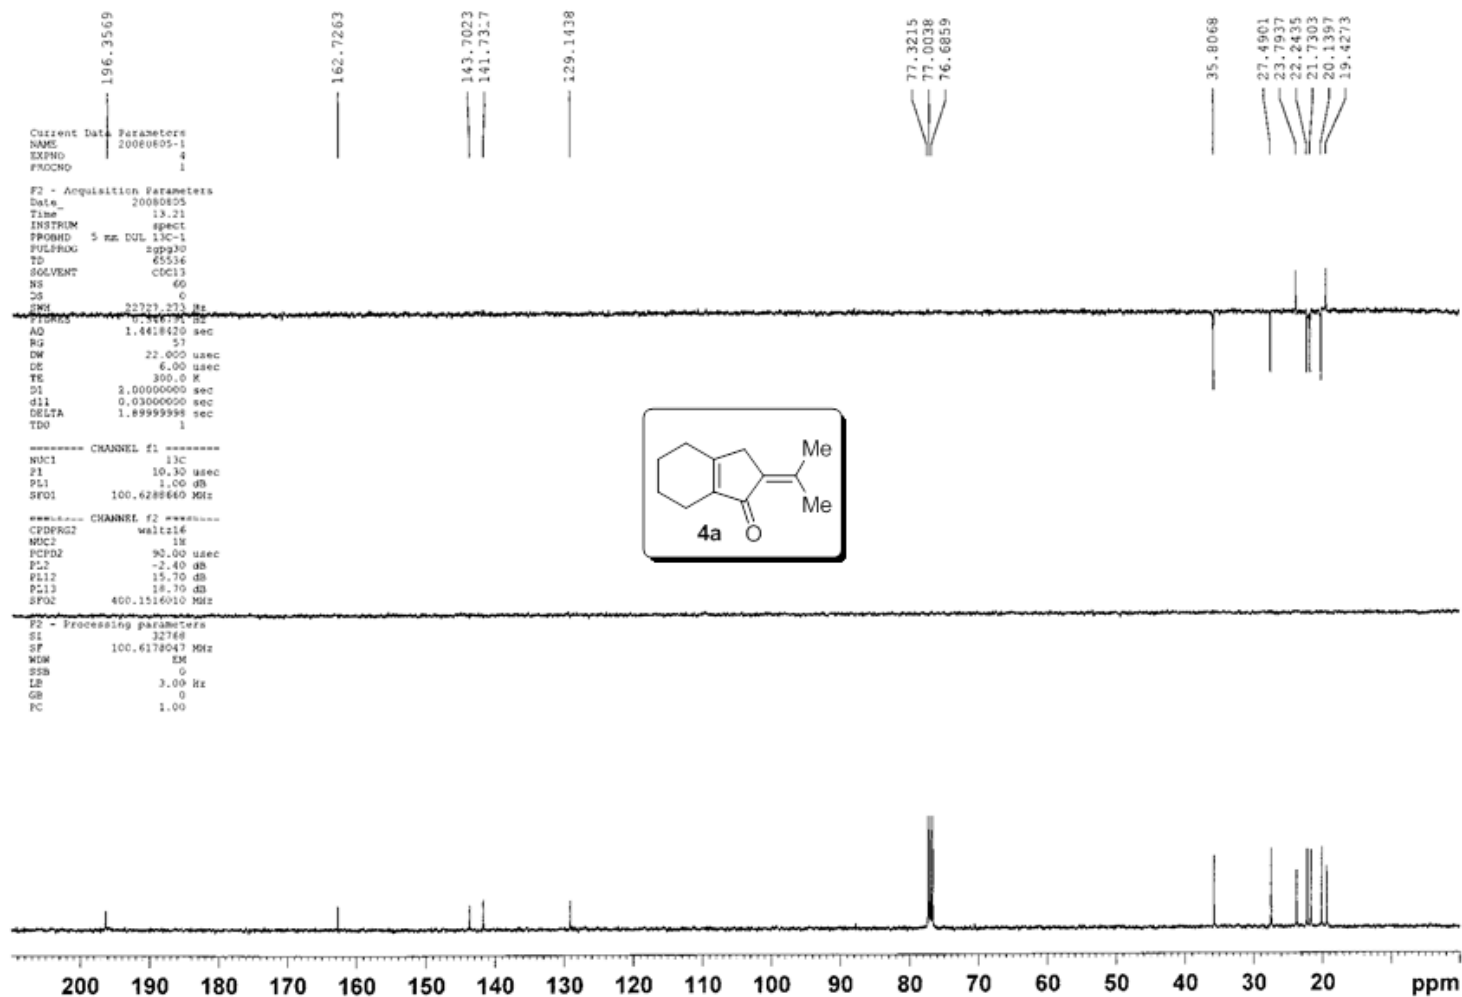

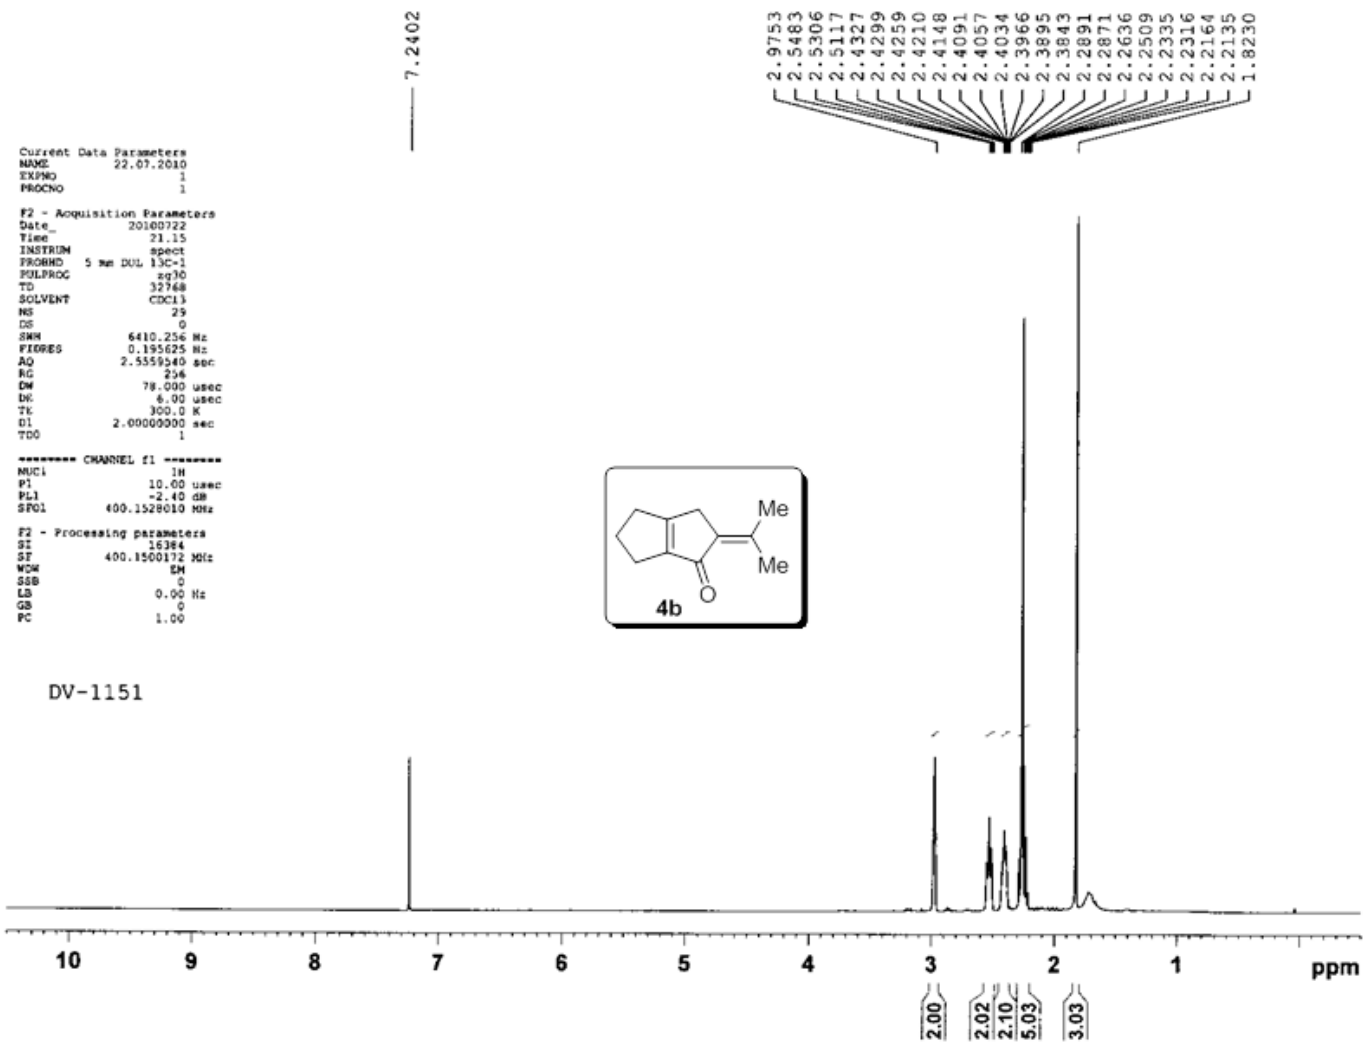

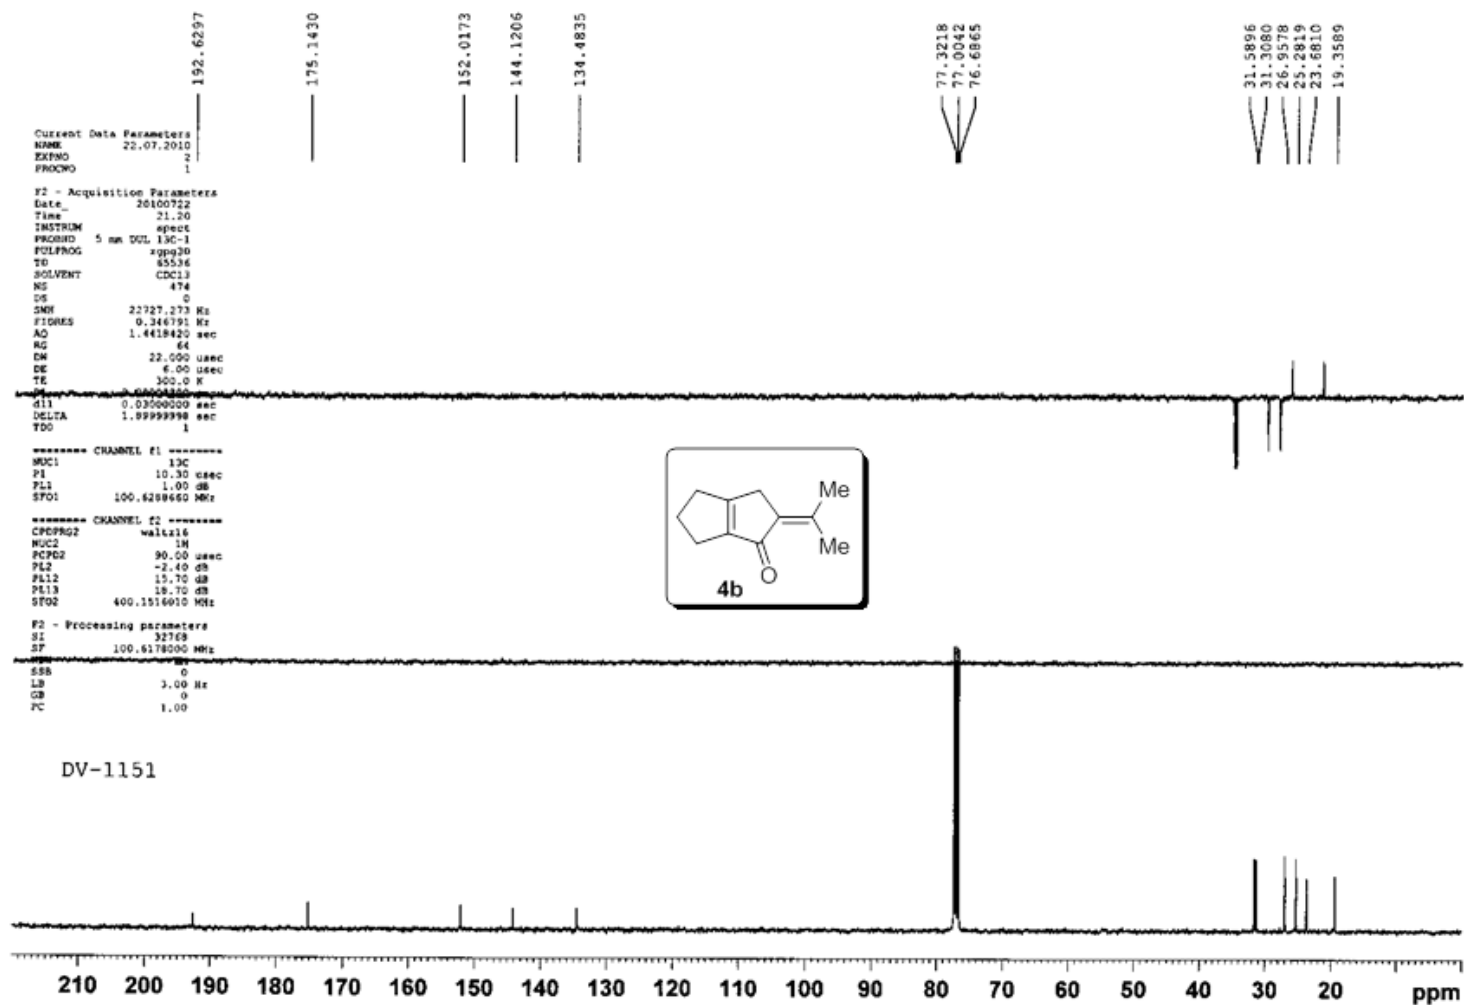

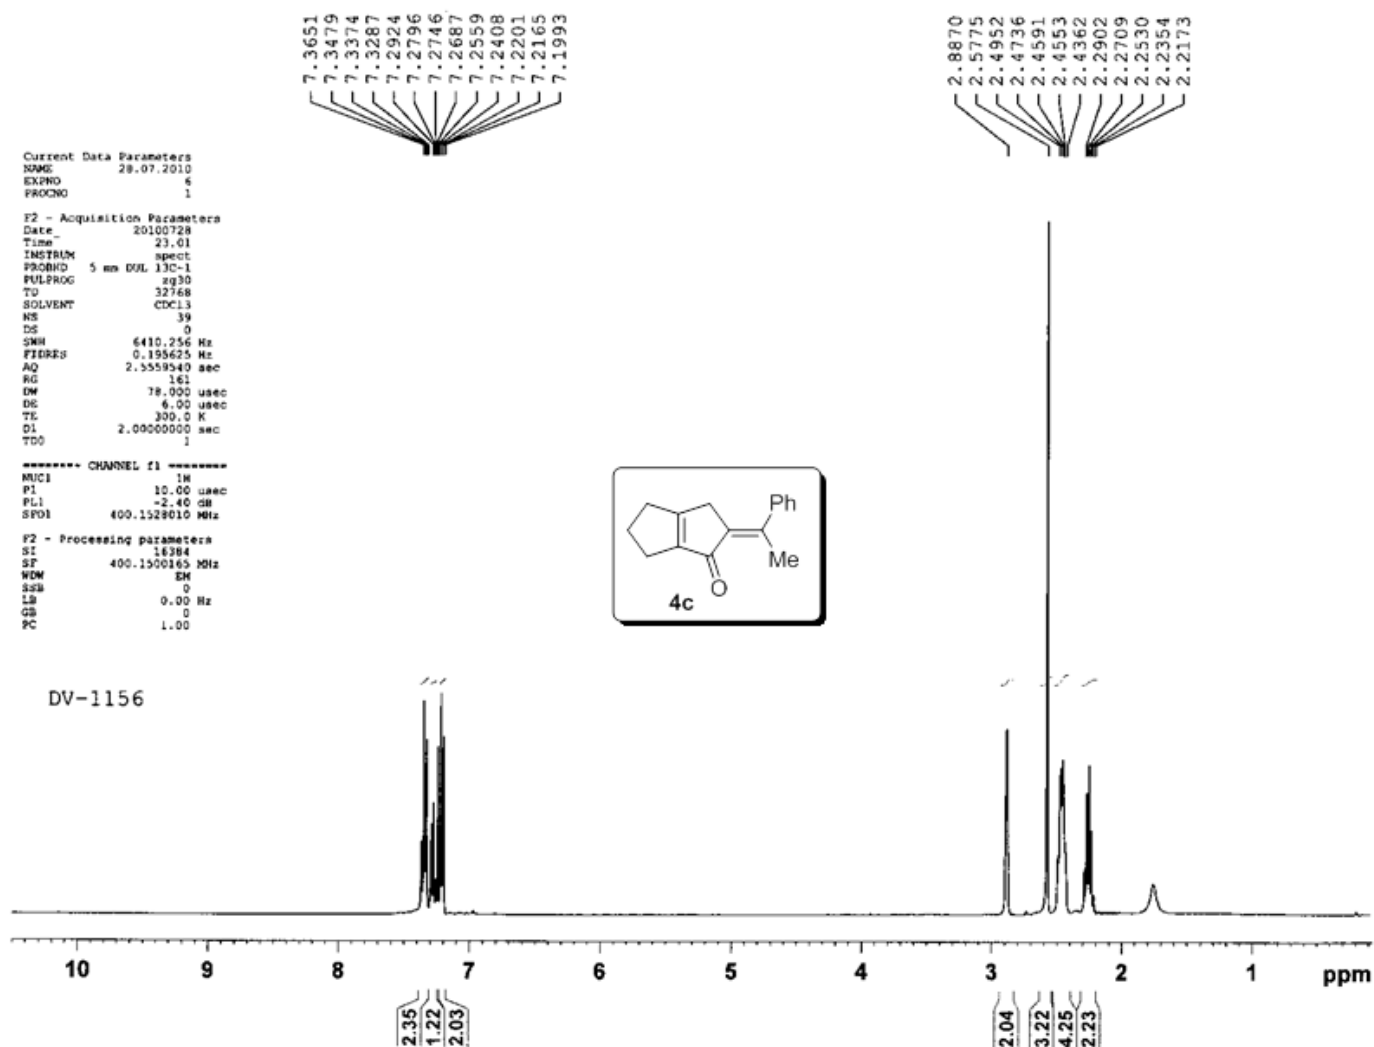

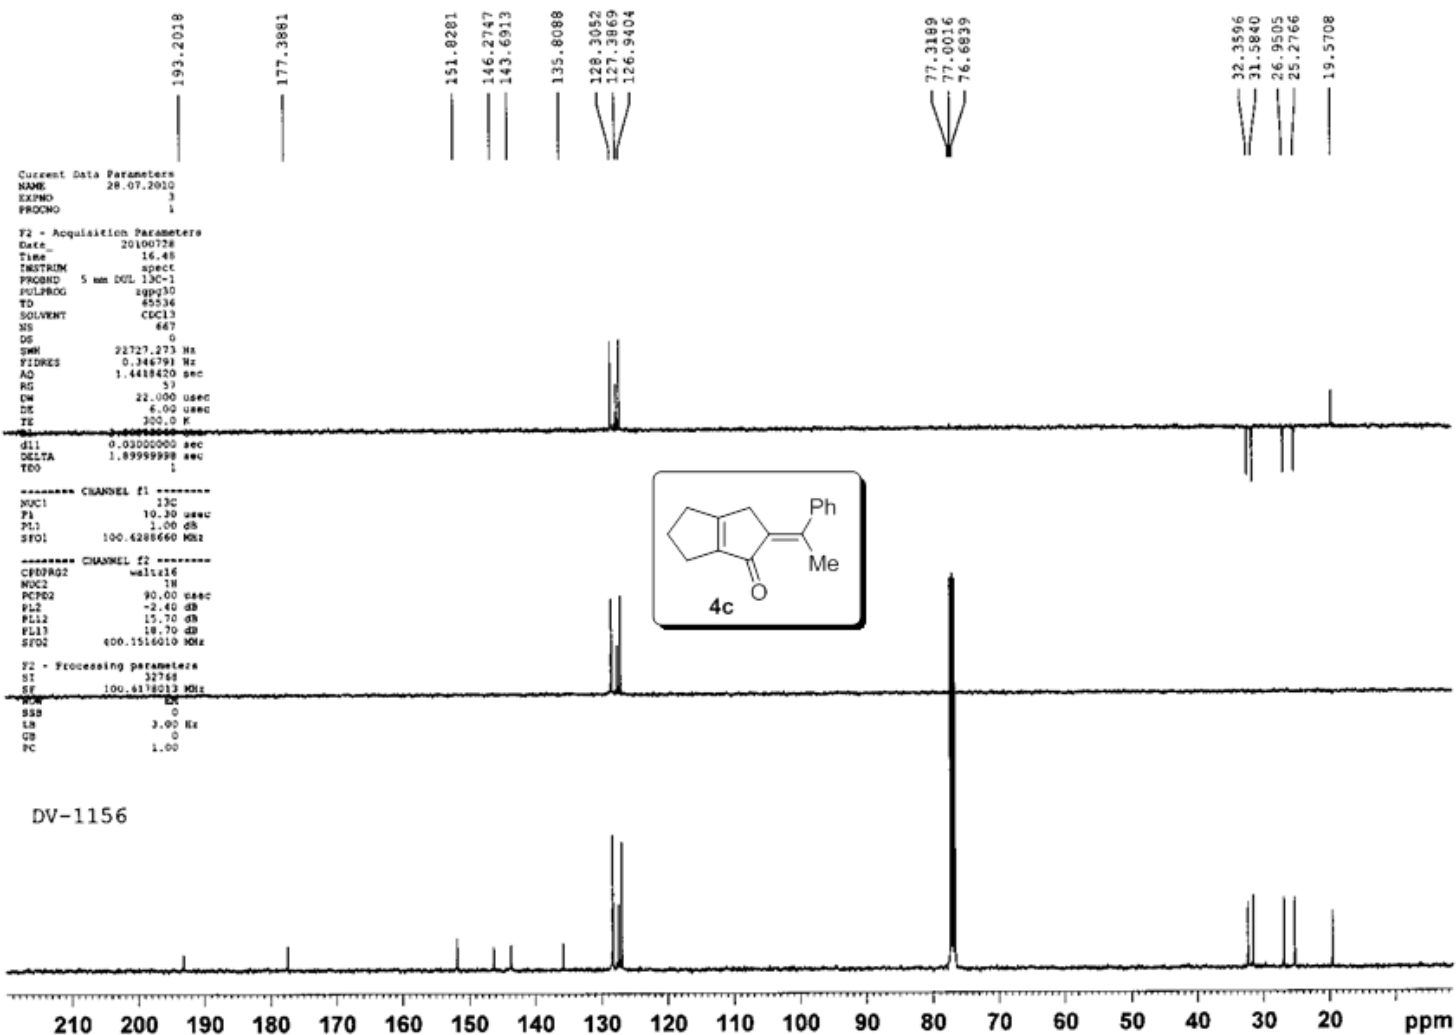

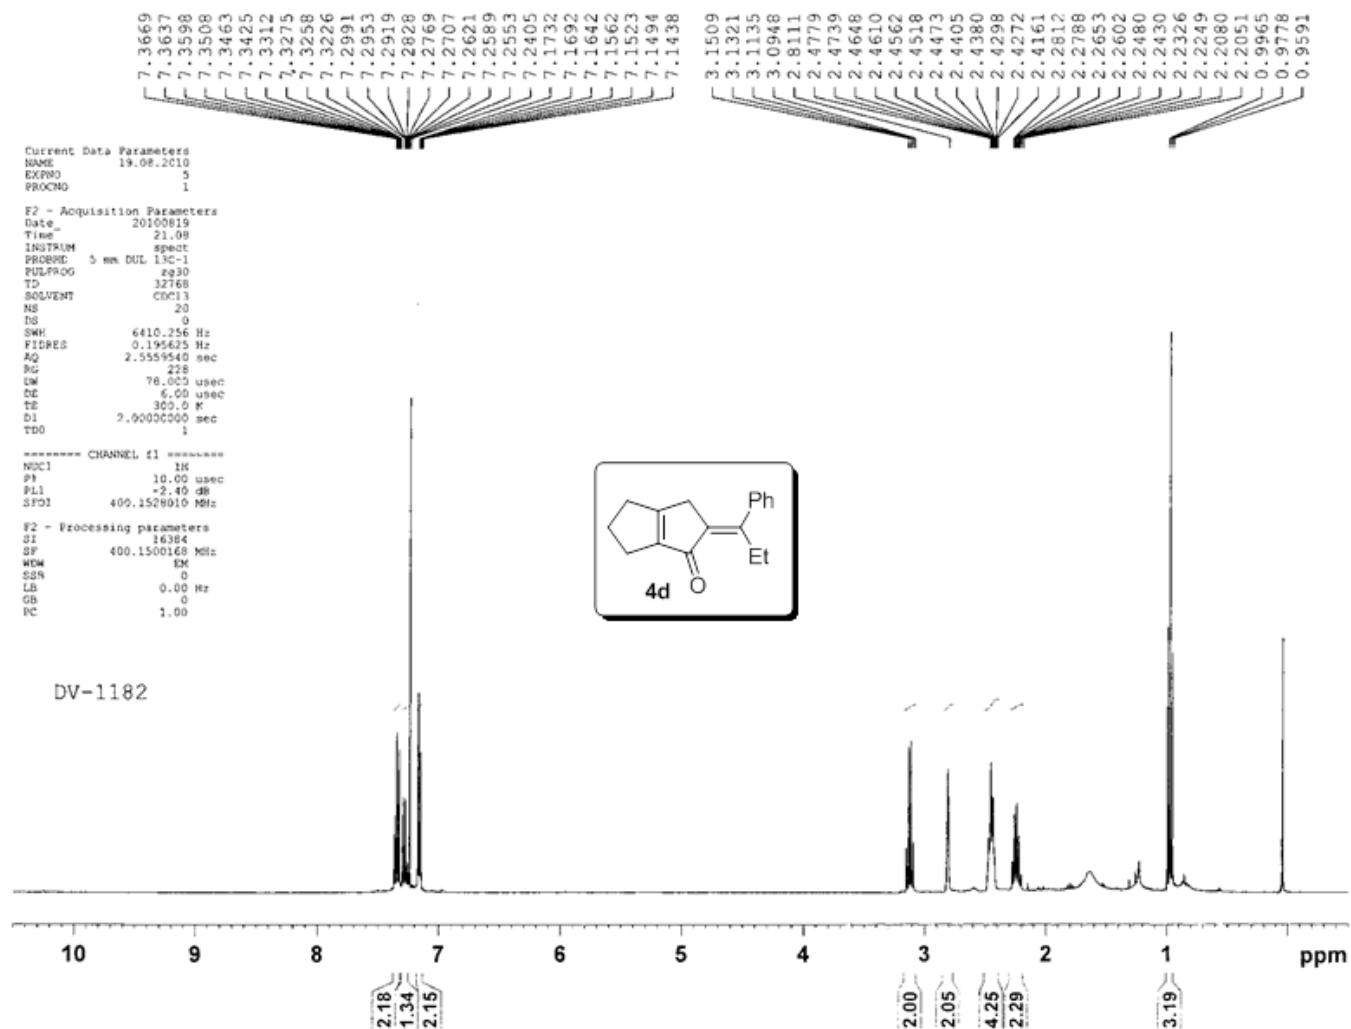



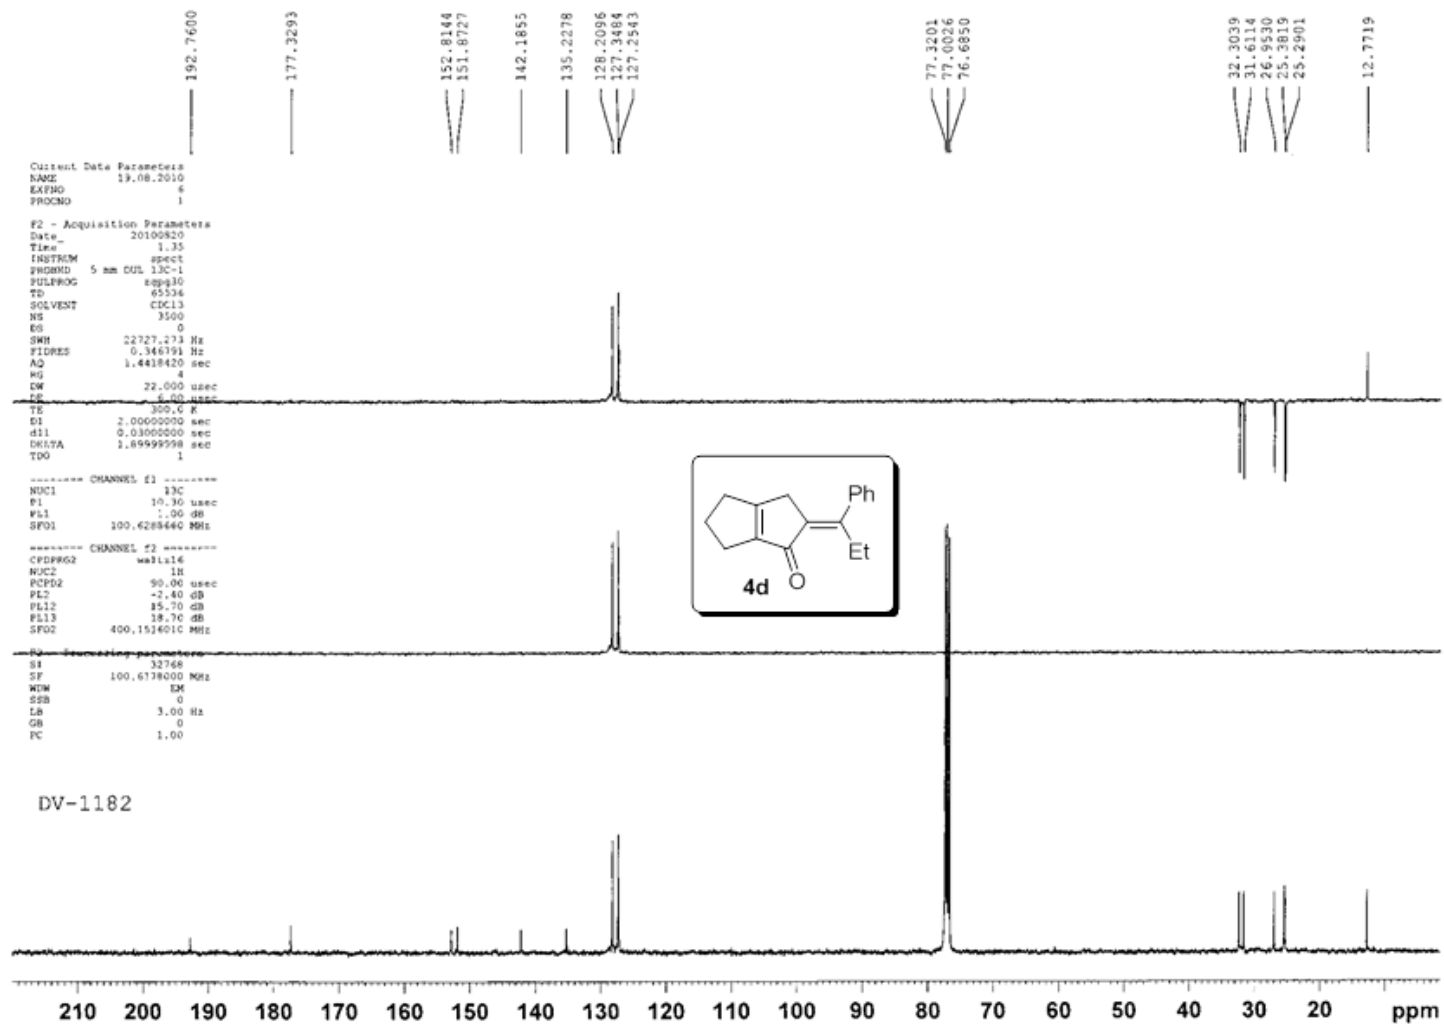

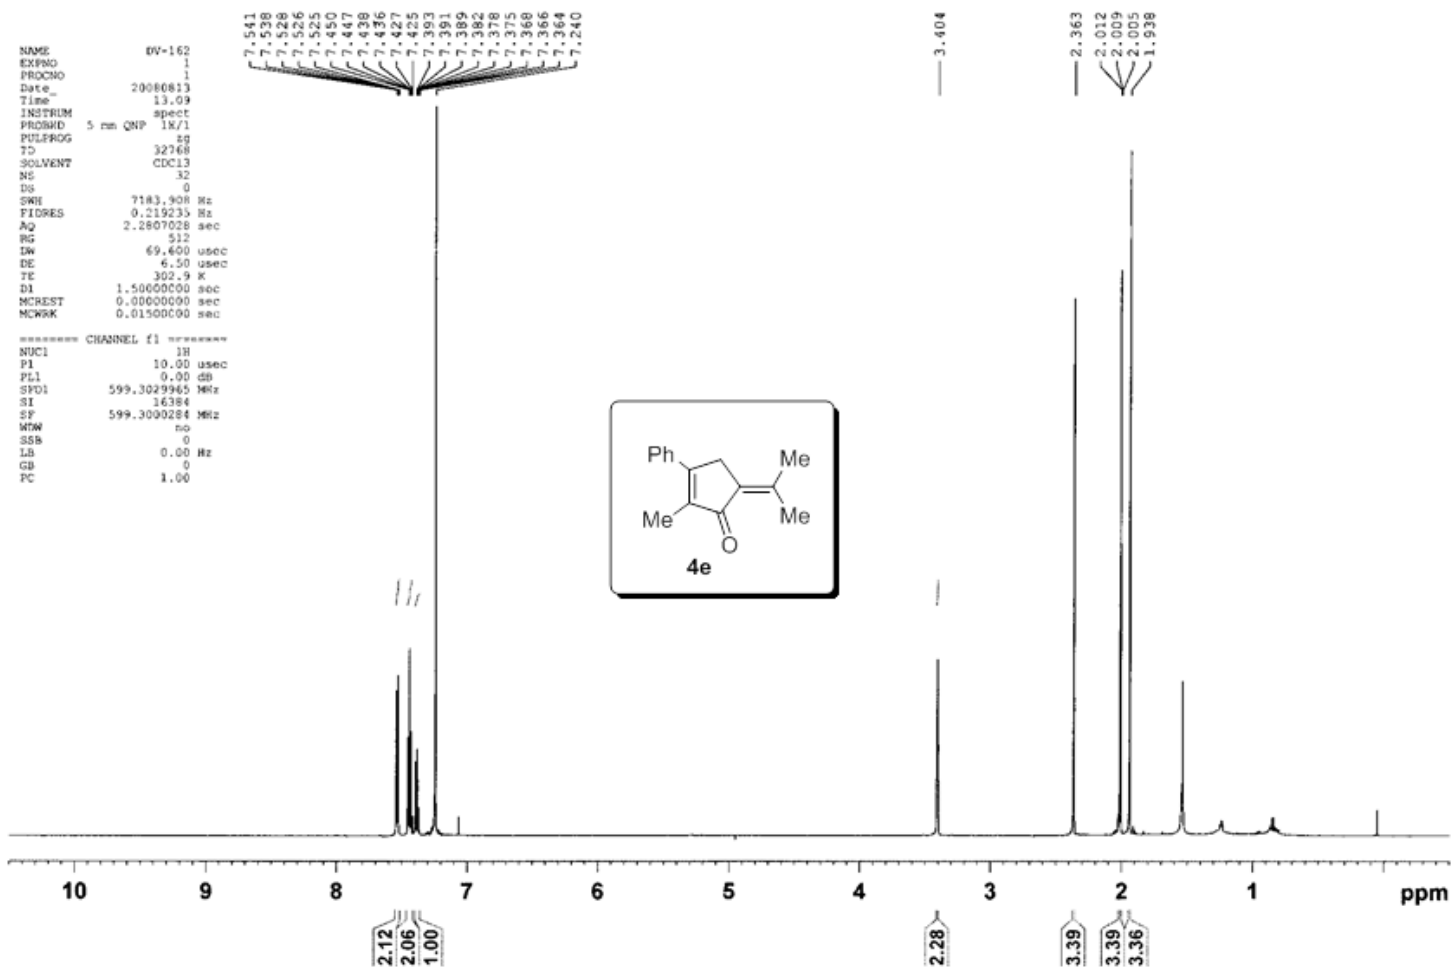

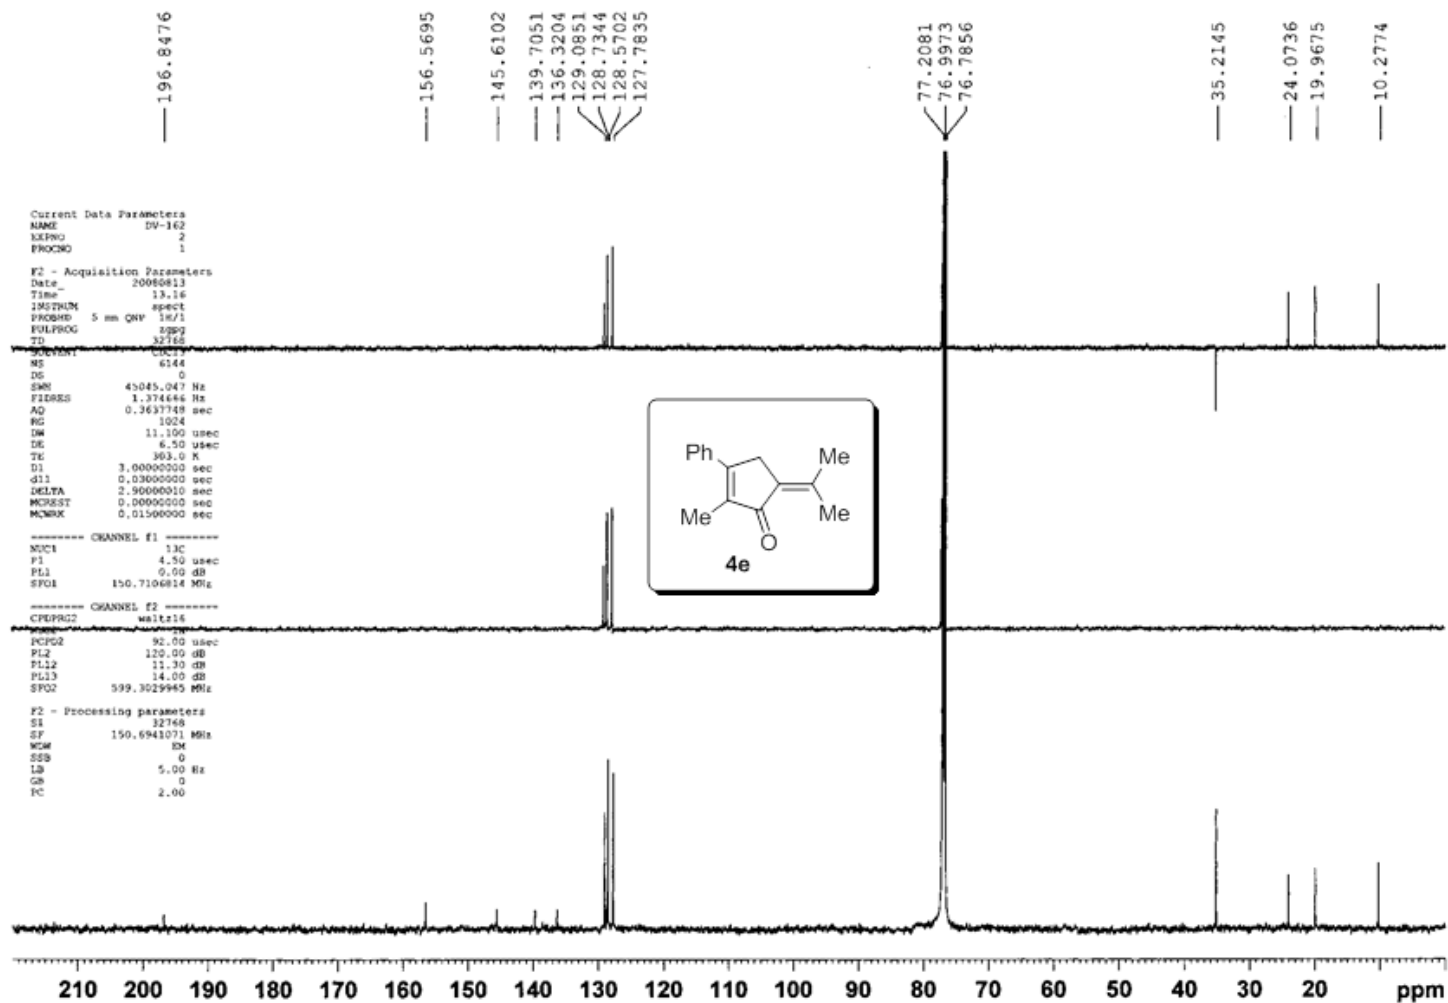

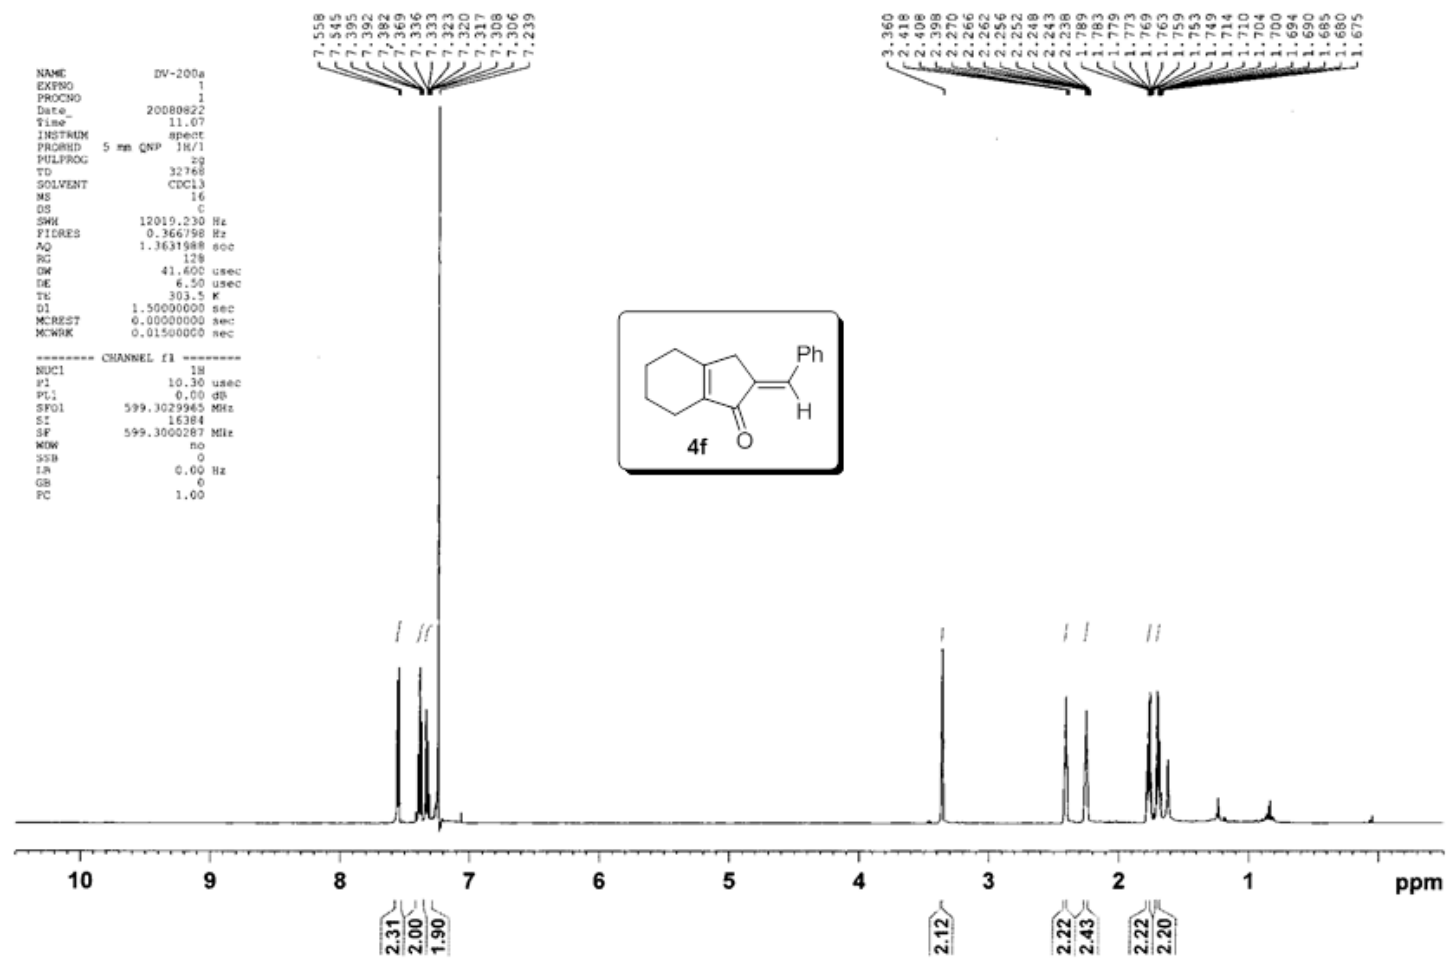

Current Data Parameters  
NAME 00-2004  
EXPNO 2  
PROCNO 1

F2 - Acquisition Parameters  
Date\_ 20080801  
Time 20.38  
INSTRUM spect  
PROBHD 5 mm QNP 1H/1  
PULPROG zgpg30  
TD 32768  
SOLVENT CDCl3  
NS 560  
DS 0  
SWH 45045.047 Hz  
FIDRES 1.974646 Hz  
AQ 0.5497748 sec  
RG 3274  
DM 11.200 usec  
DE 6.50 usec  
TE 303.2 K  
D1 3.50000000 sec  
d11 0.00000000 sec  
DELTA 2.90000000 sec  
REPEAT 0.00000000 sec  
PCLOCK 0.01500000 sec

===== CHANNEL f1 =====  
NUC1 13C  
P1 4.50 usec  
PL1 0.00 dB  
SFO1 100.626125 MHz

===== CHANNEL f2 =====  
CPDPRG2 waltz16  
NUC2 1H  
PCPD2 92.00 usec  
PL2 126.00 dB  
PL12 11.30 dB  
PL13 14.00 dB  
SFO2 500.136099 MHz

F2 - Processing parameters  
SI 32768  
SF 150.694085 MHz  
WDW EM  
SSB 0  
LB 5.00 Hz  
GB 0  
PC 1.00

1D NMR plot parameters  
CL 20.00 cm  
CY 4.00 cm  
F1 200.000 ppm  
F2 500.136099 MHz  
F3 0.000 ppm  
F4 0.00 Hz  
F5 10.00000 ppm/cm  
HSCN 1506.94104 Hz/cm

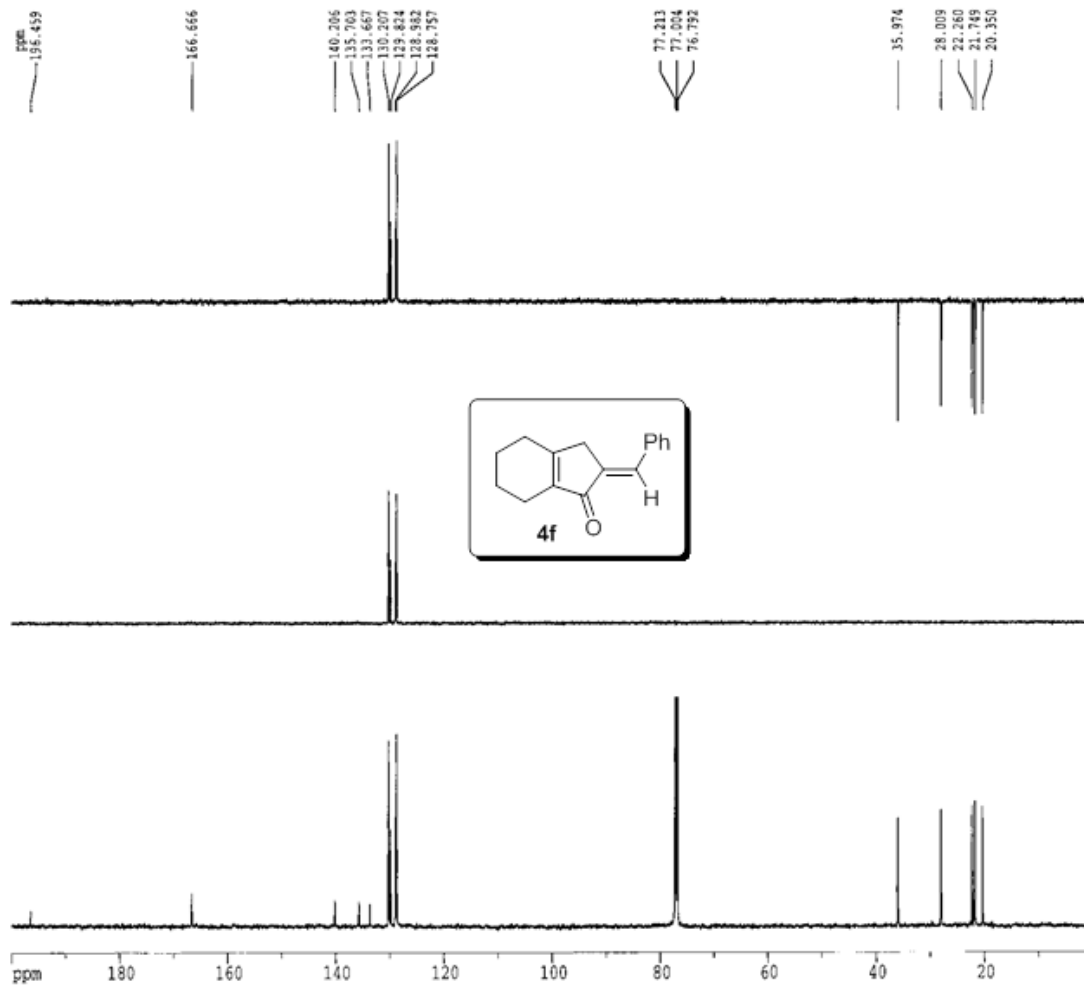

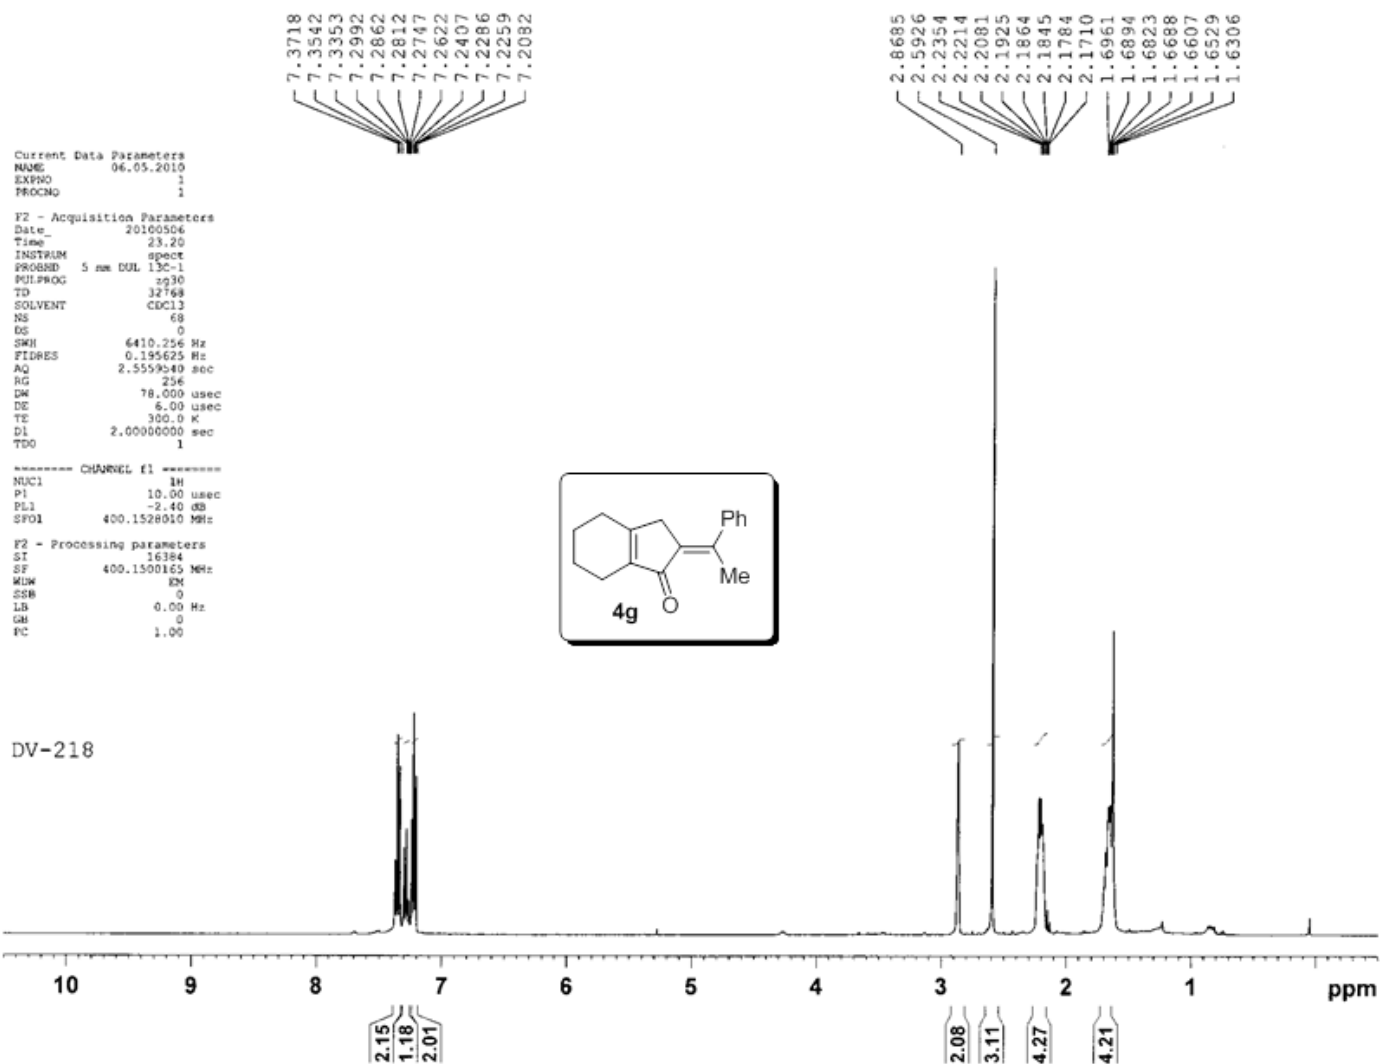

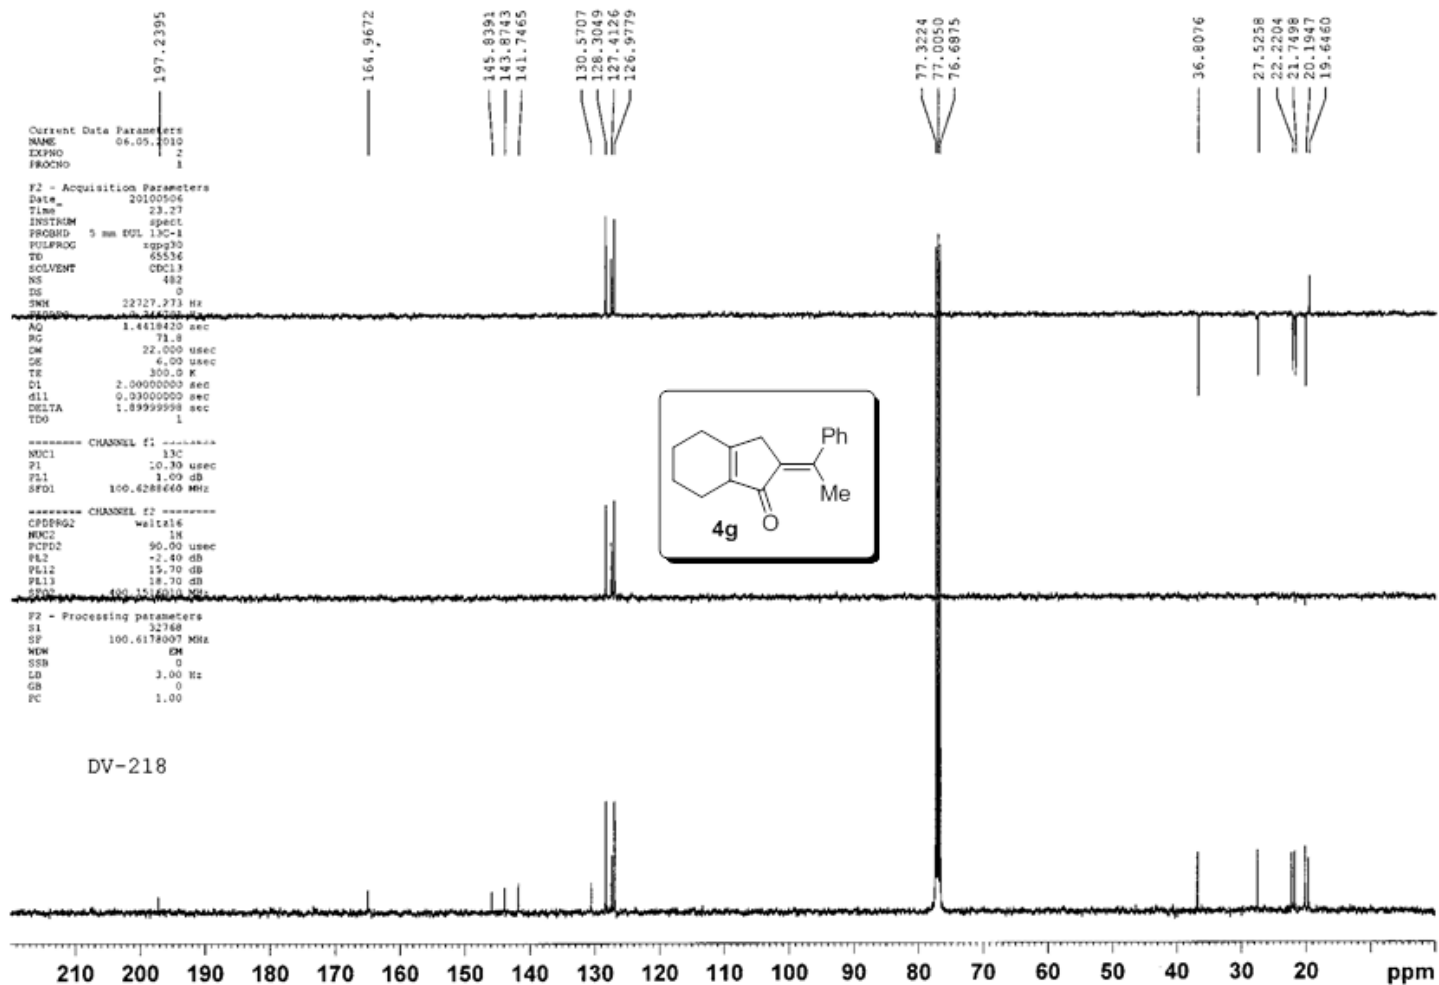

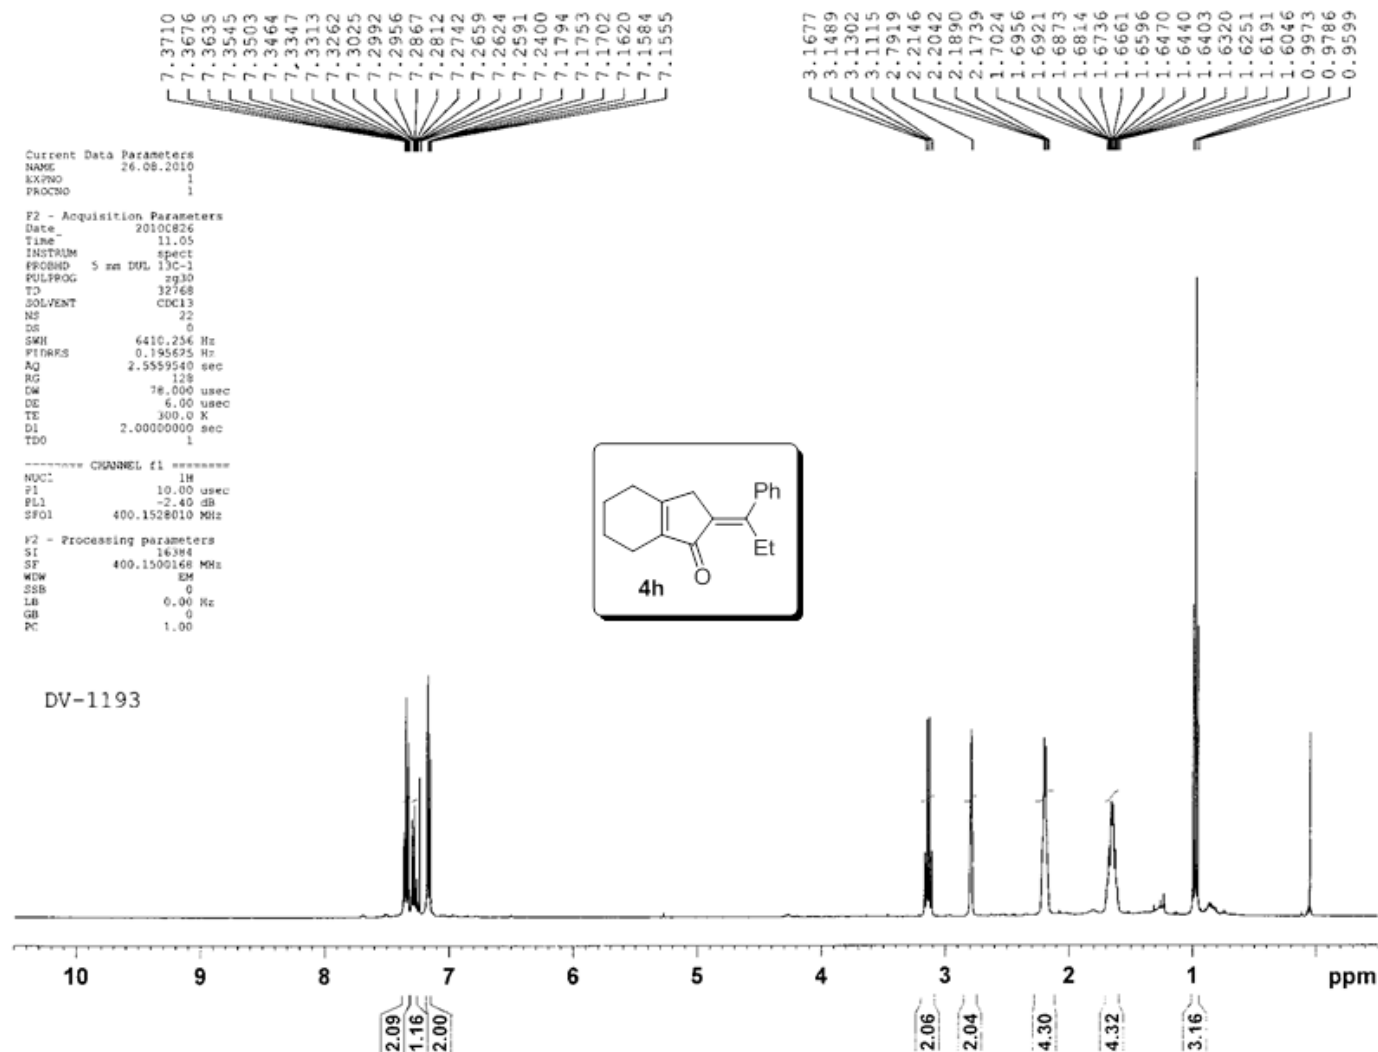



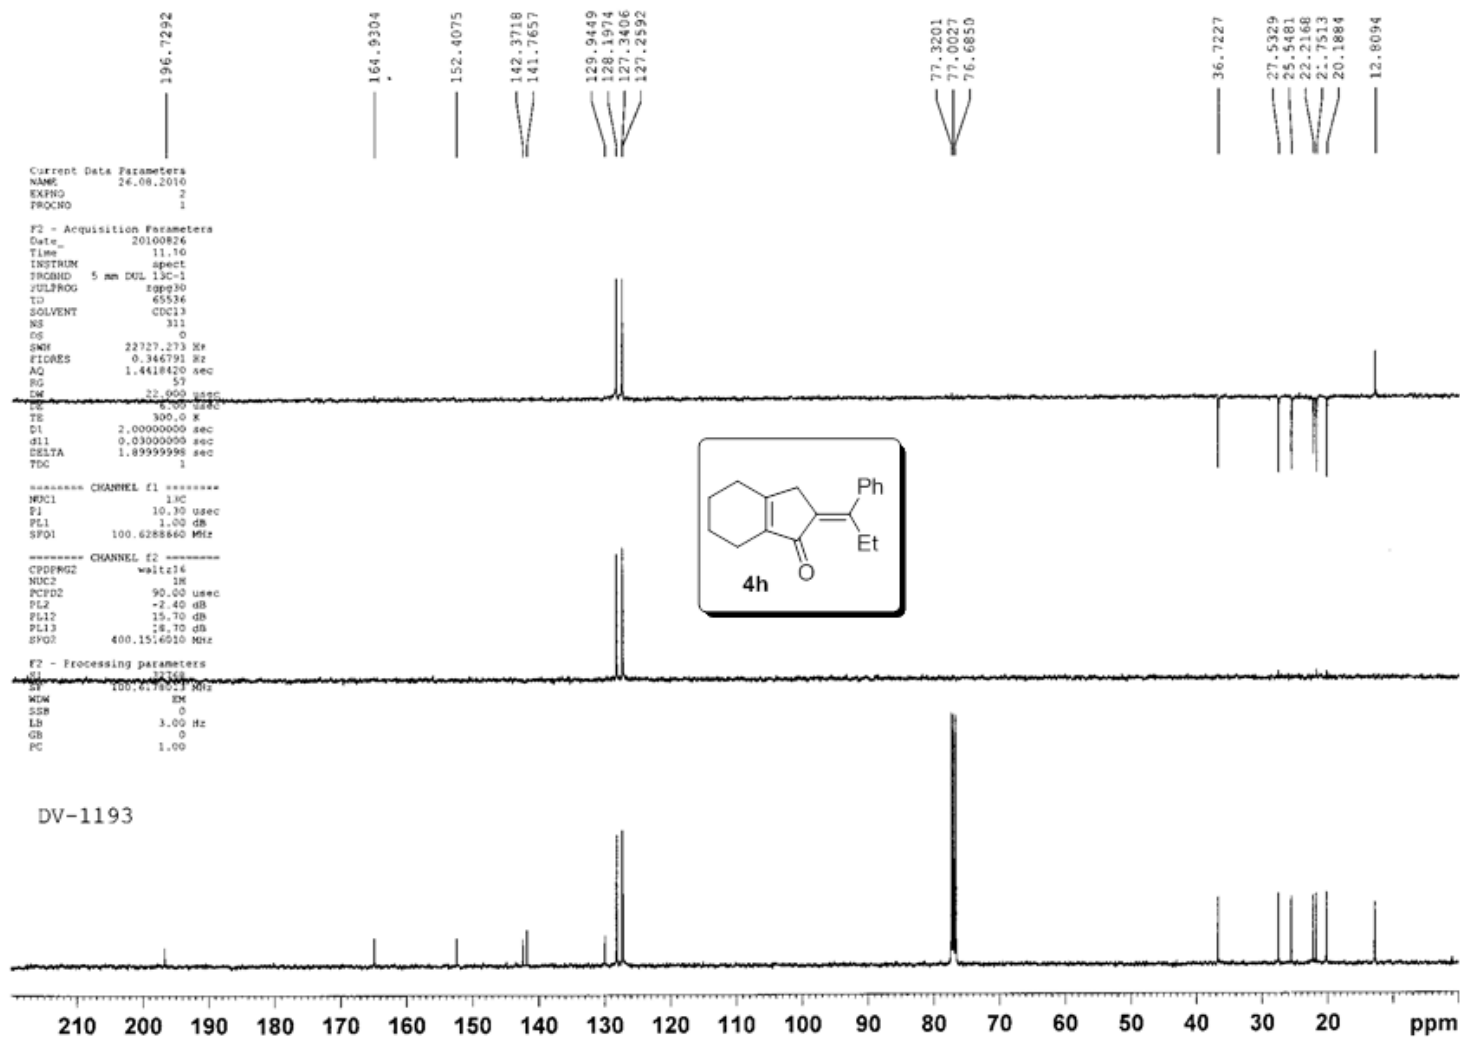

Current Data Parameters  
NAME 30.07.2011  
EXPNO 2  
PROCNO 1

F2 - Acquisition Parameters  
Date\_ 20110730  
Time 15.27  
INSTRUM spect  
PROBHD 5 mm DUL 13C-1  
PULPROG zg30  
TD 32768  
SOLVENT CDCl3  
NS 66  
DS 0  
SWH 6410.256 Hz  
FIDRES 0.195625 Hz  
AQ 2.5559540 sec  
RG 228  
DM 78.000 usec  
DE 6.00 usec  
TE 300.0 K  
D1 2.00000000 sec  
TDO 1

----- CHANNEL f1 -----  
NUC1 1H  
P1 10.00 usec  
PL1 -2.40 dB  
SFO1 400.1528010 MHz

F2 - Processing parameters  
SI 16384  
SF 400.1500168 MHz  
WDW EM  
SSB 0  
LB 0.00 Hz  
GB 0  
PC 1.00

DV-1452-1

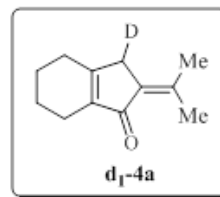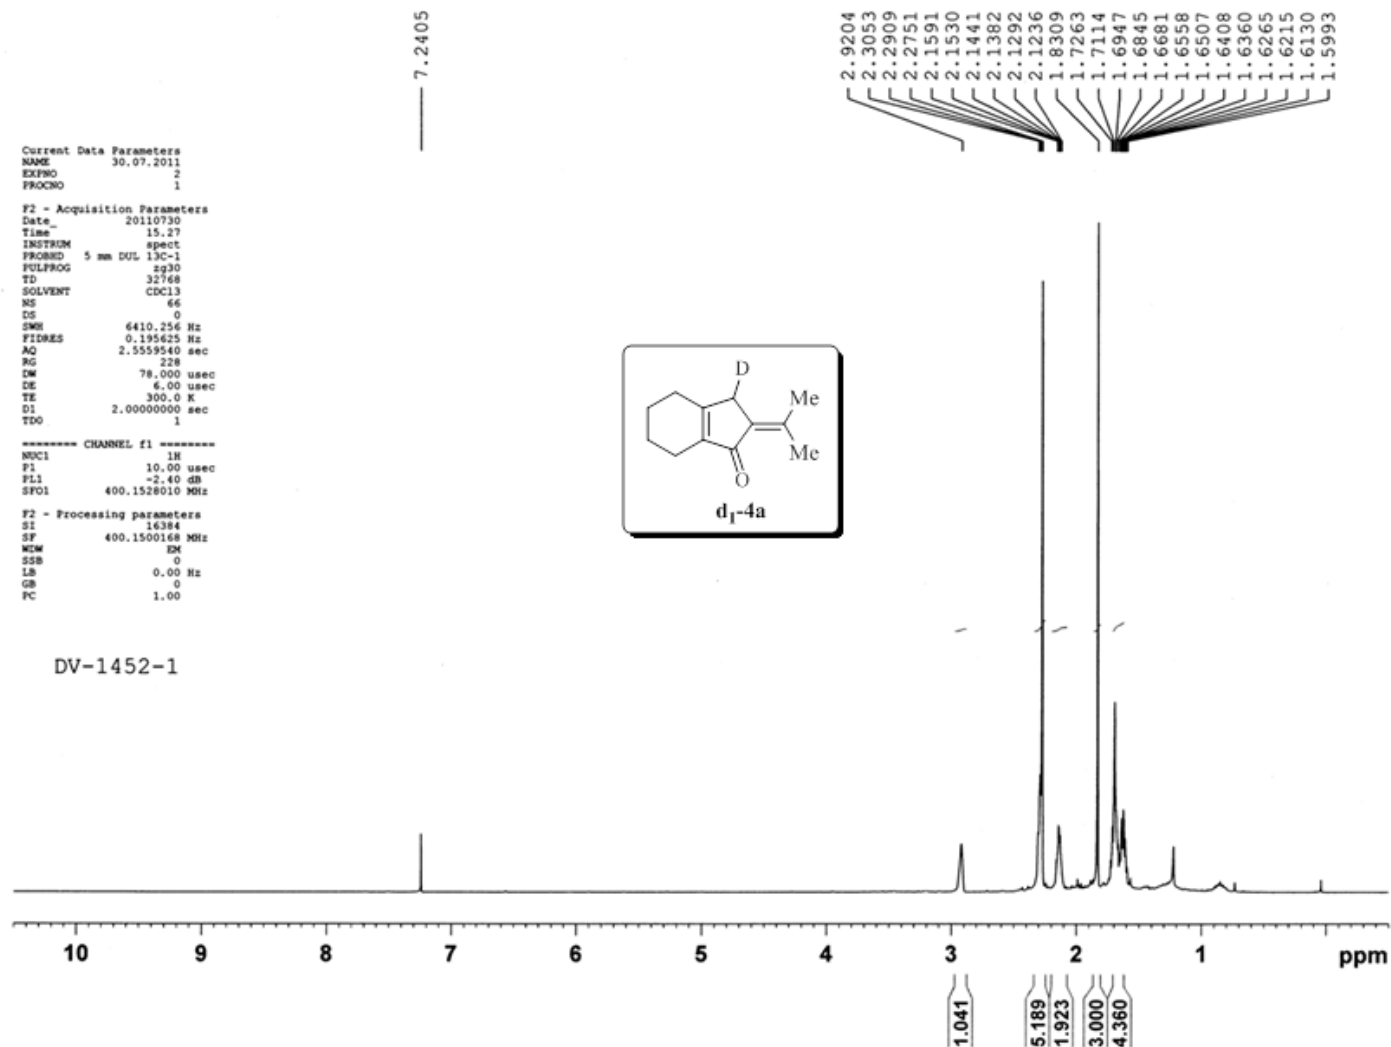

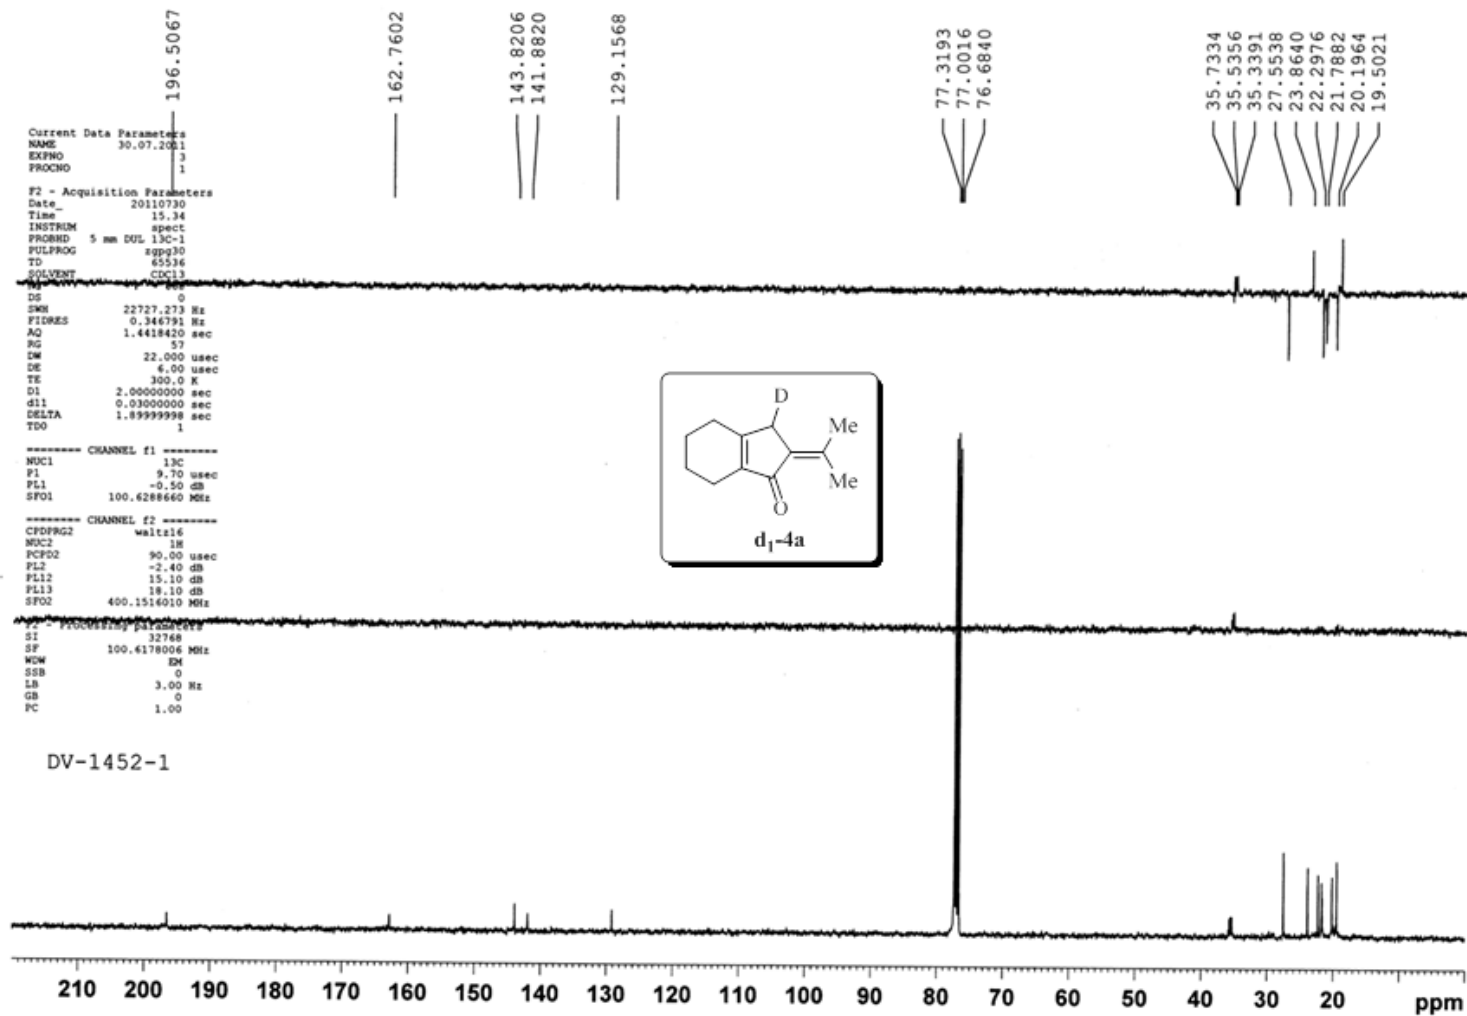

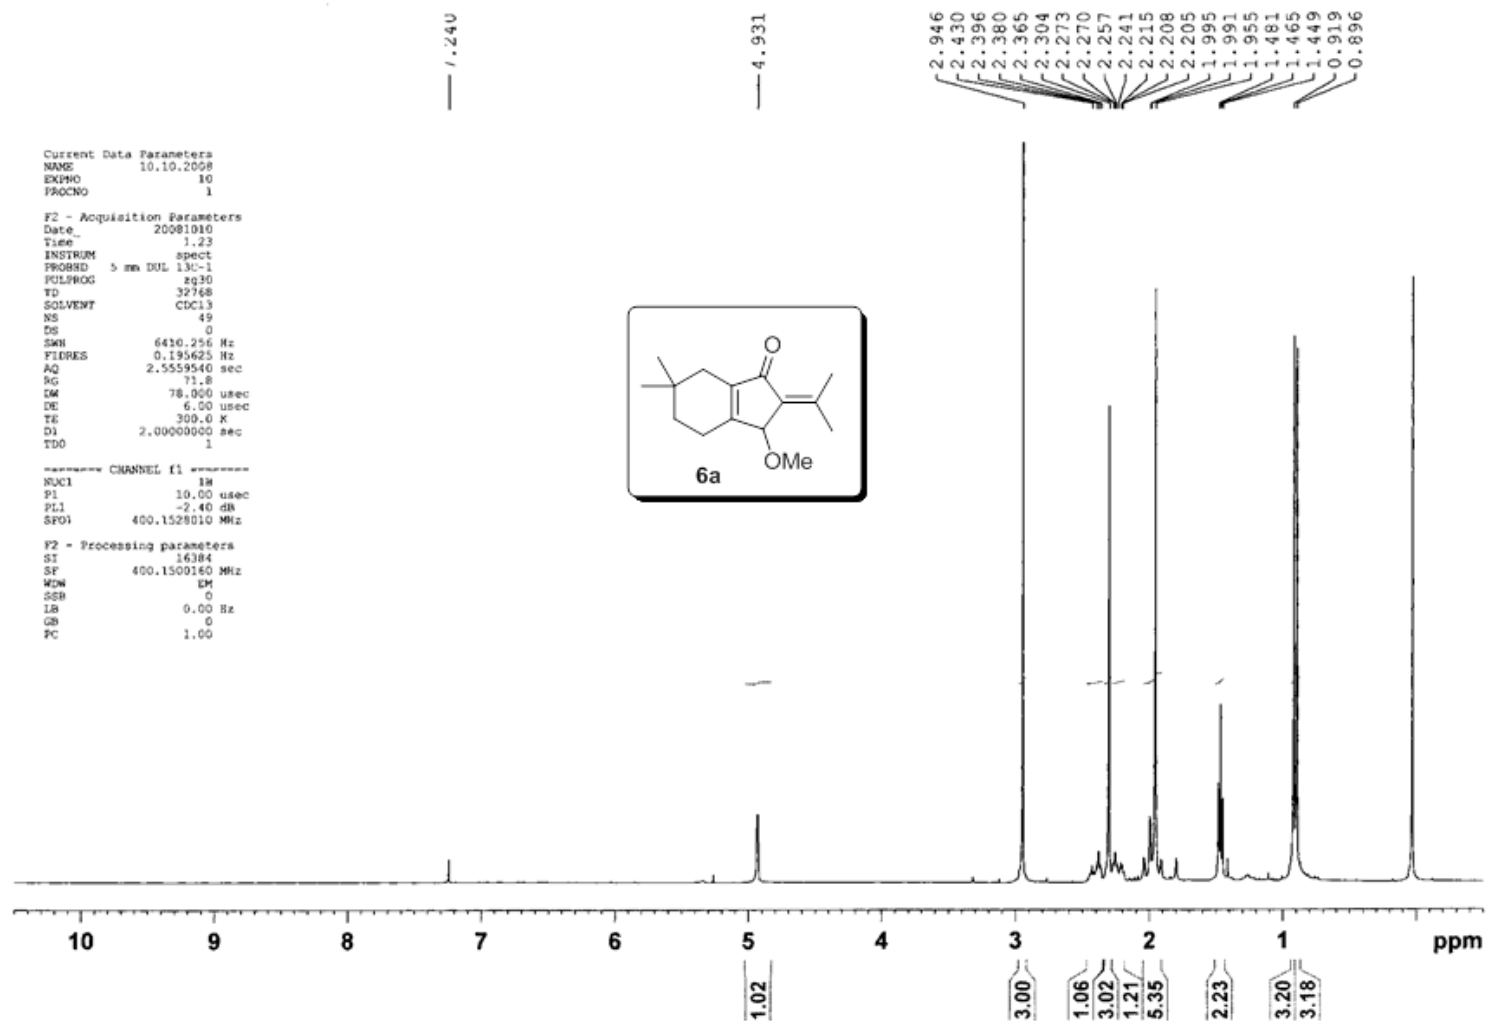

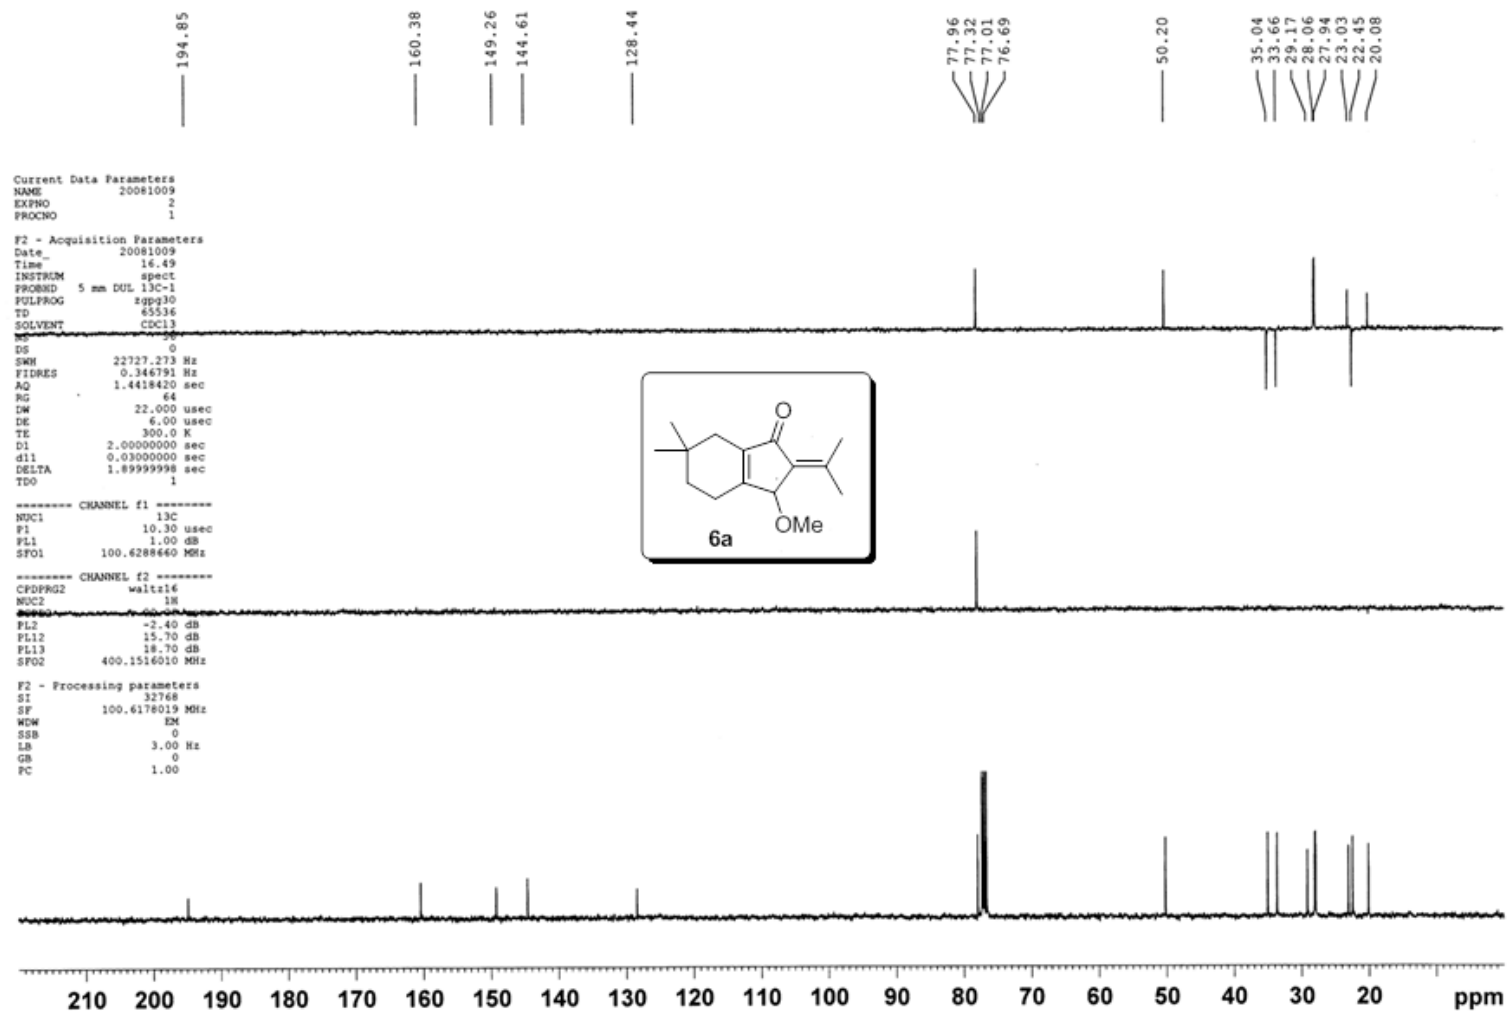

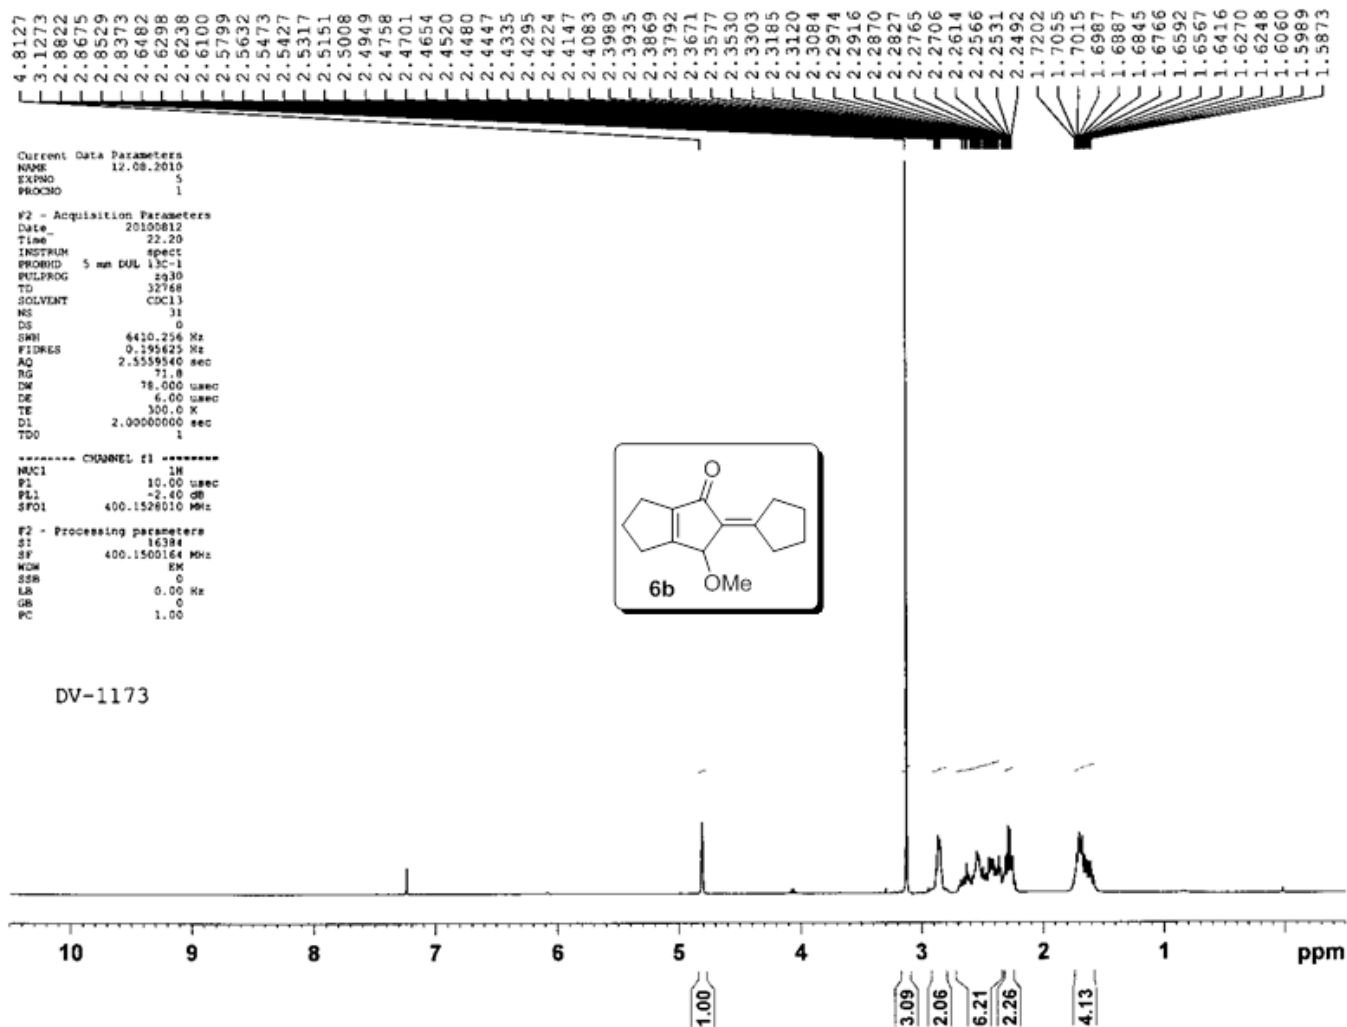

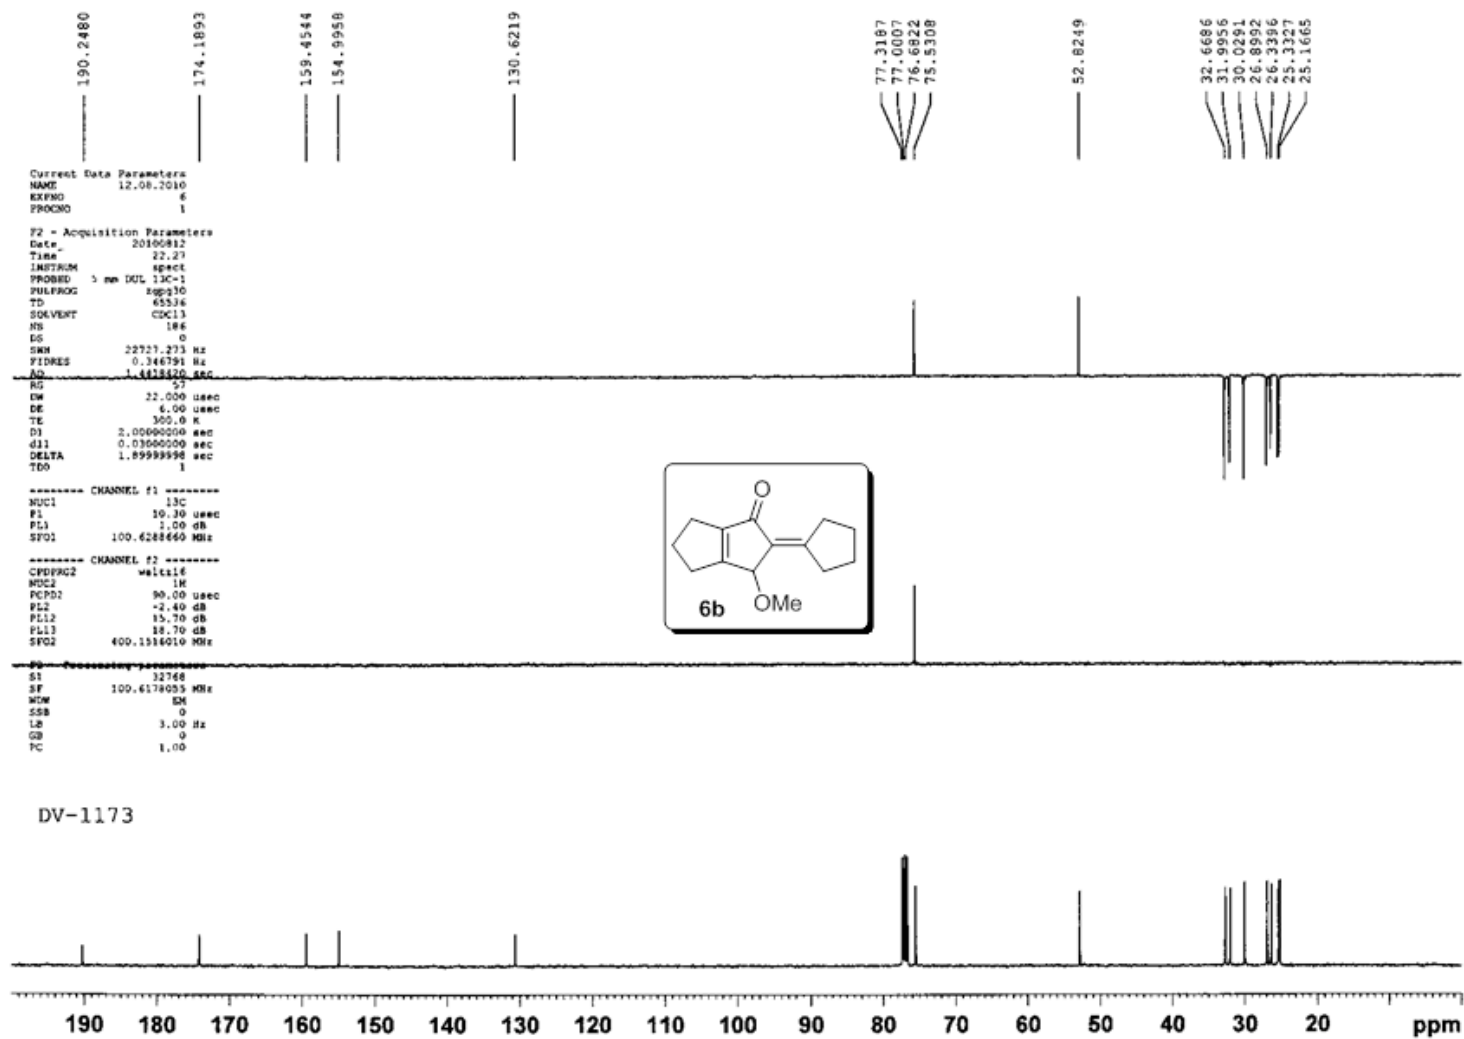

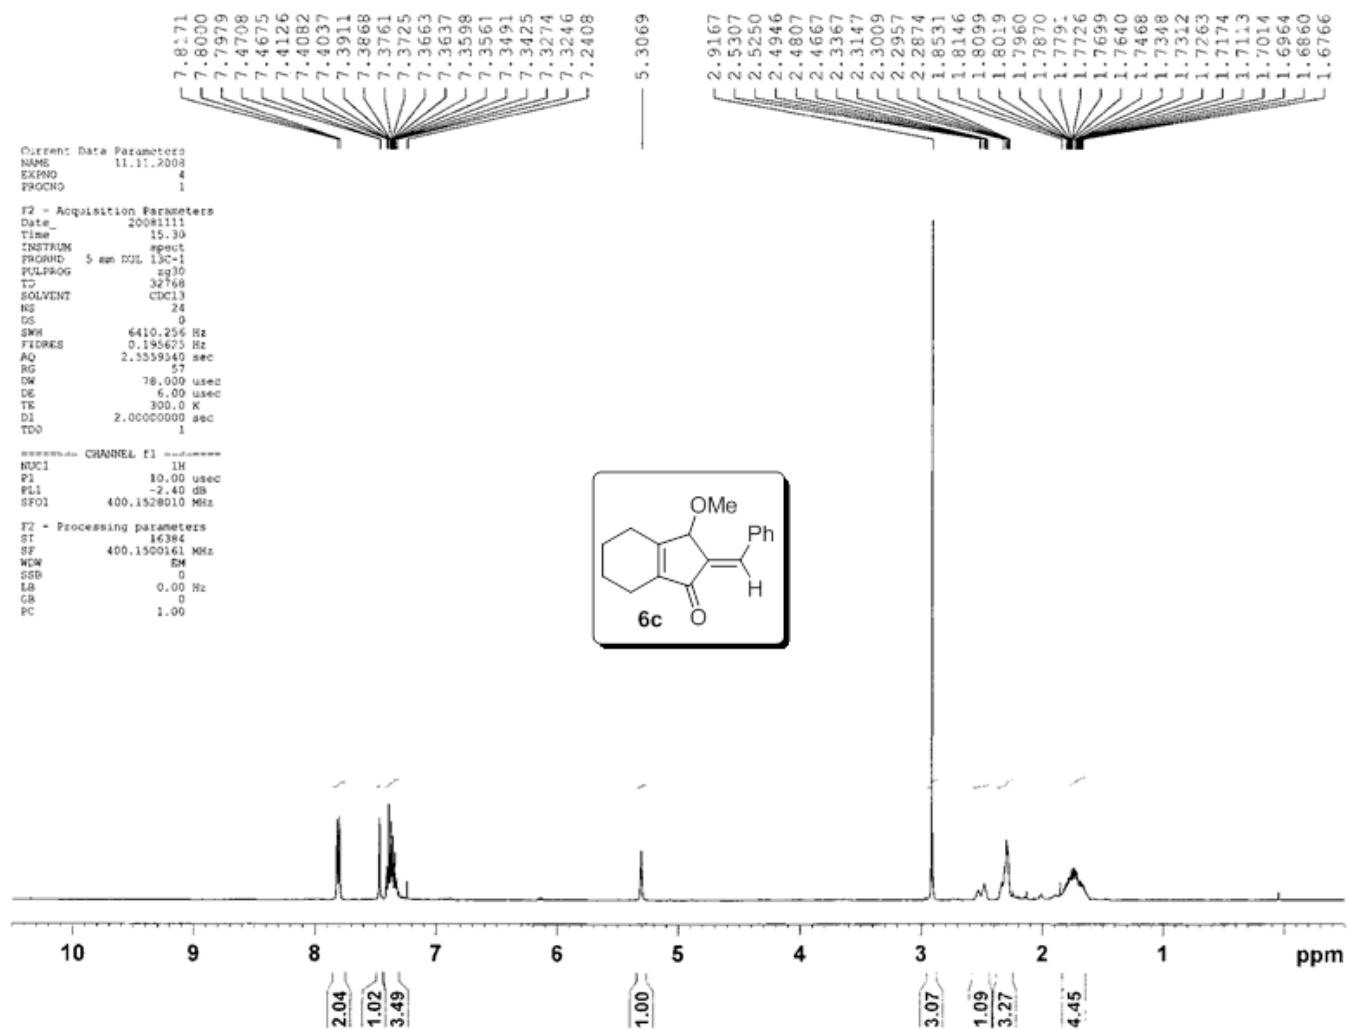



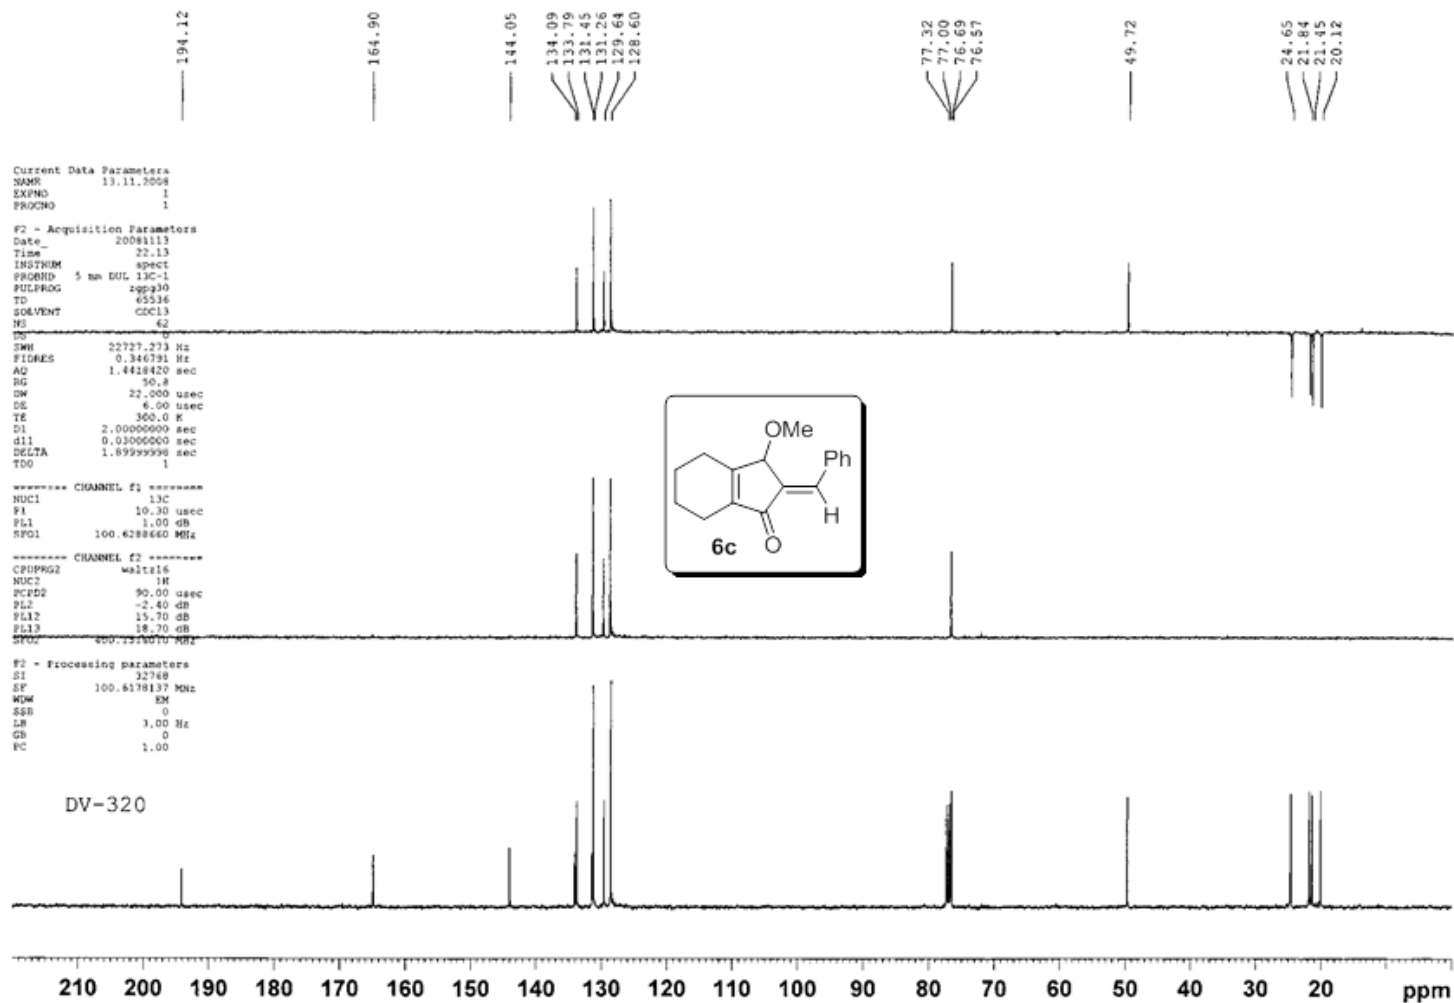

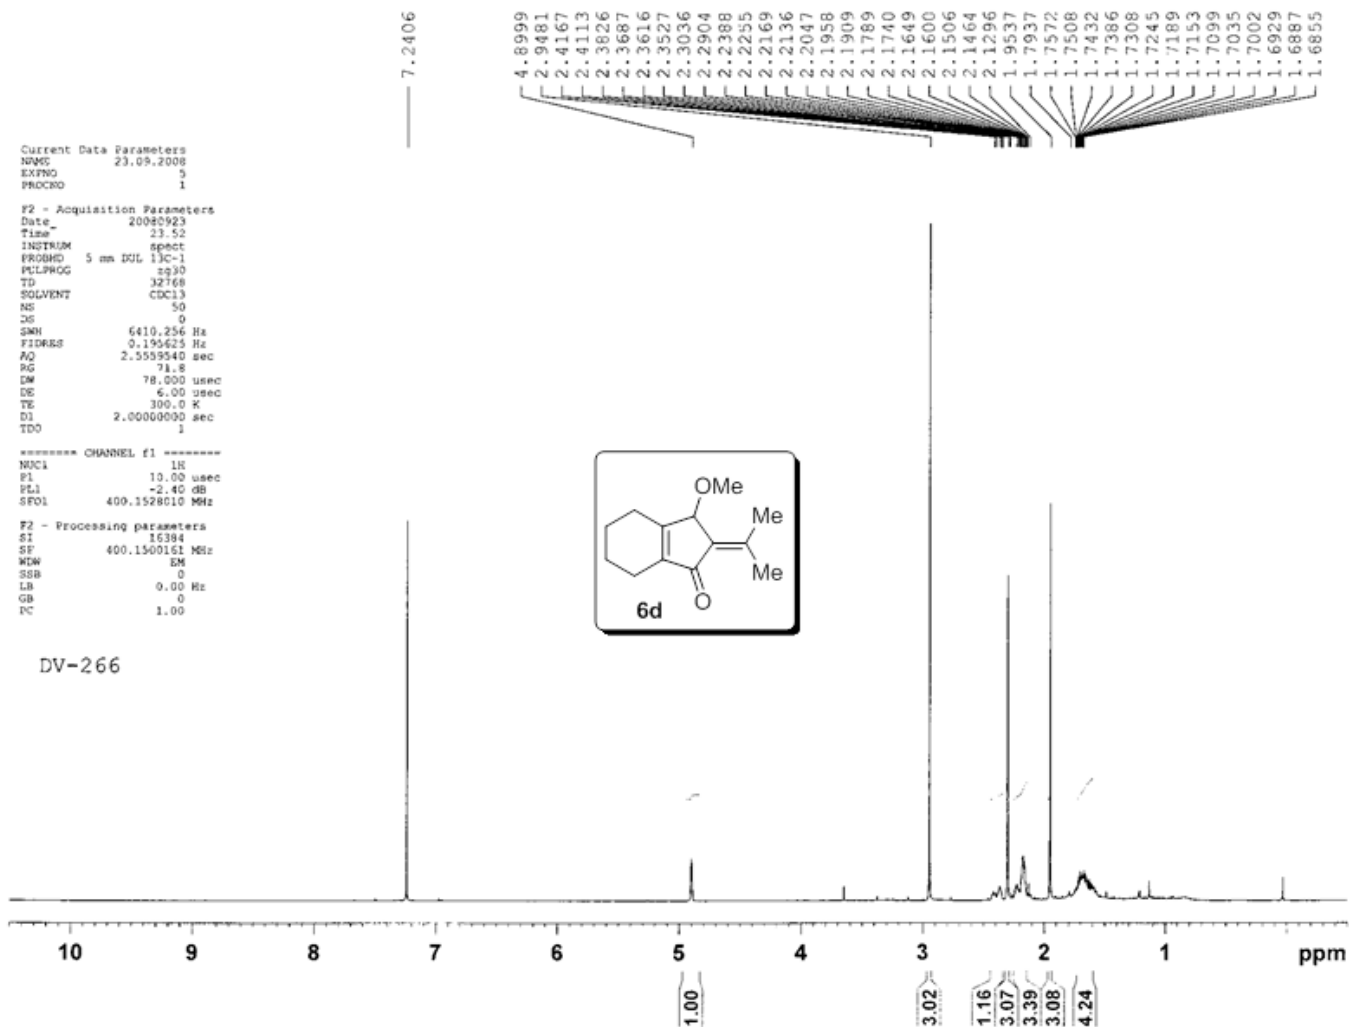

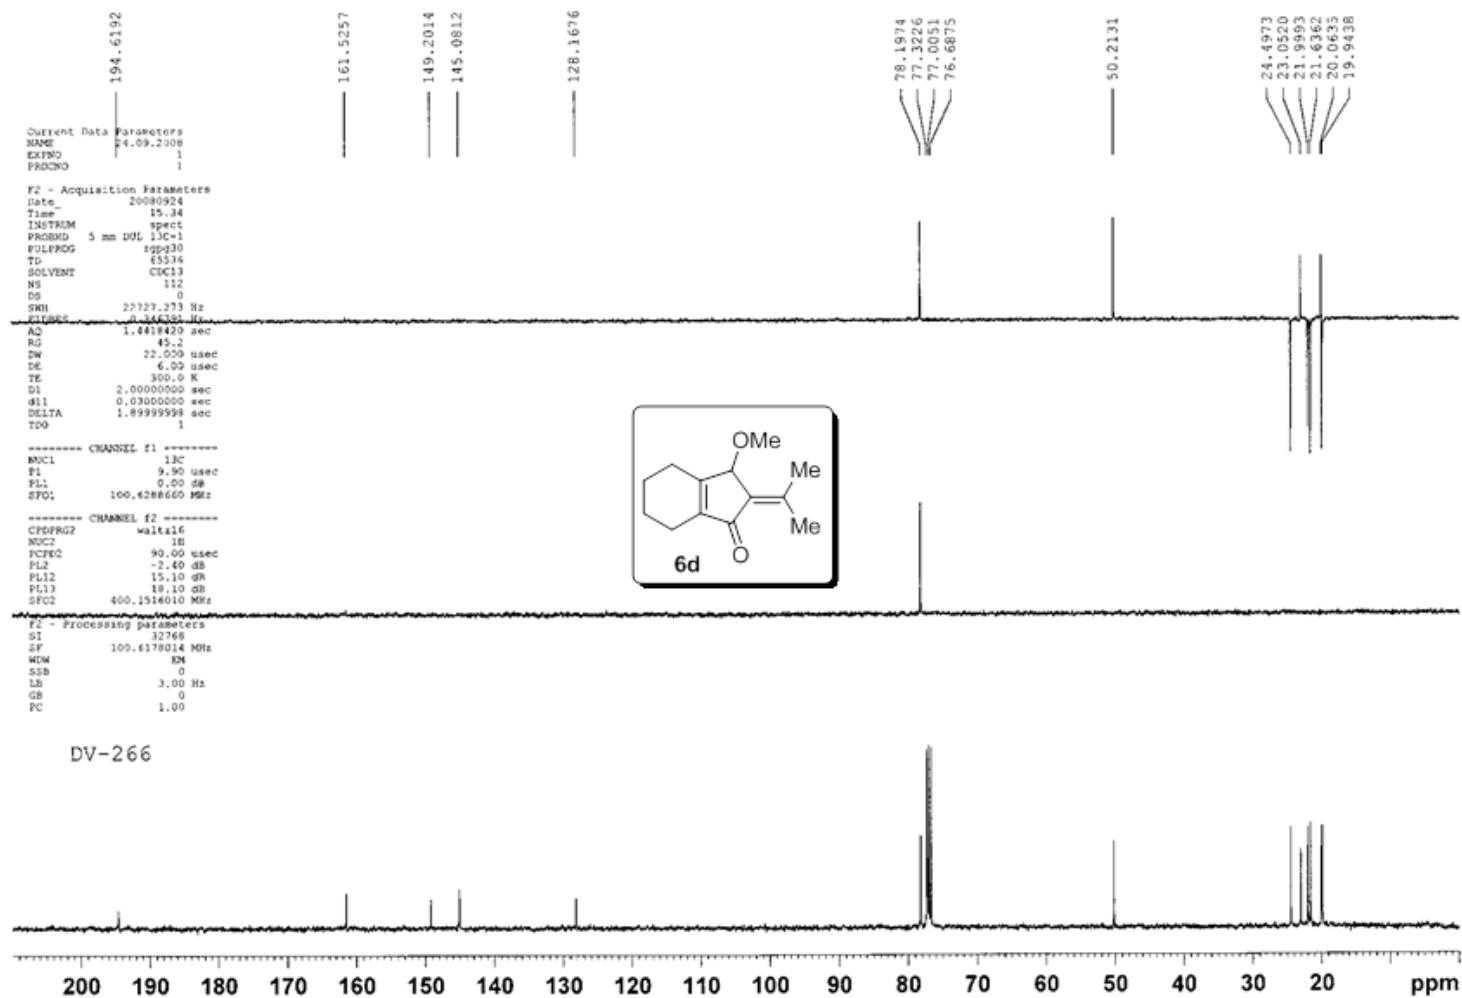

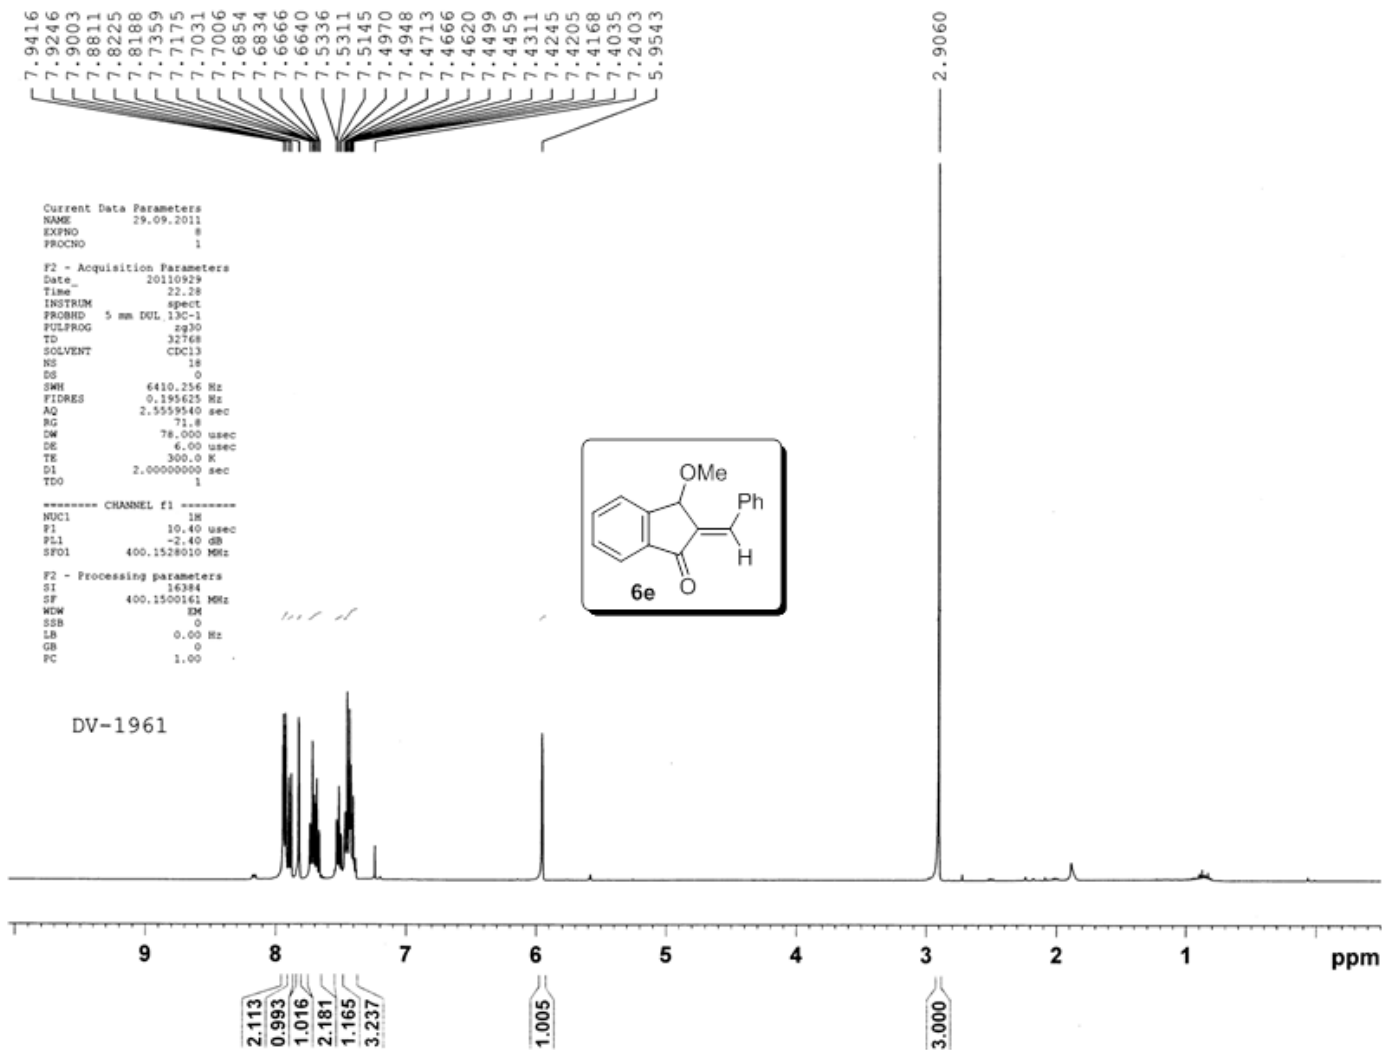

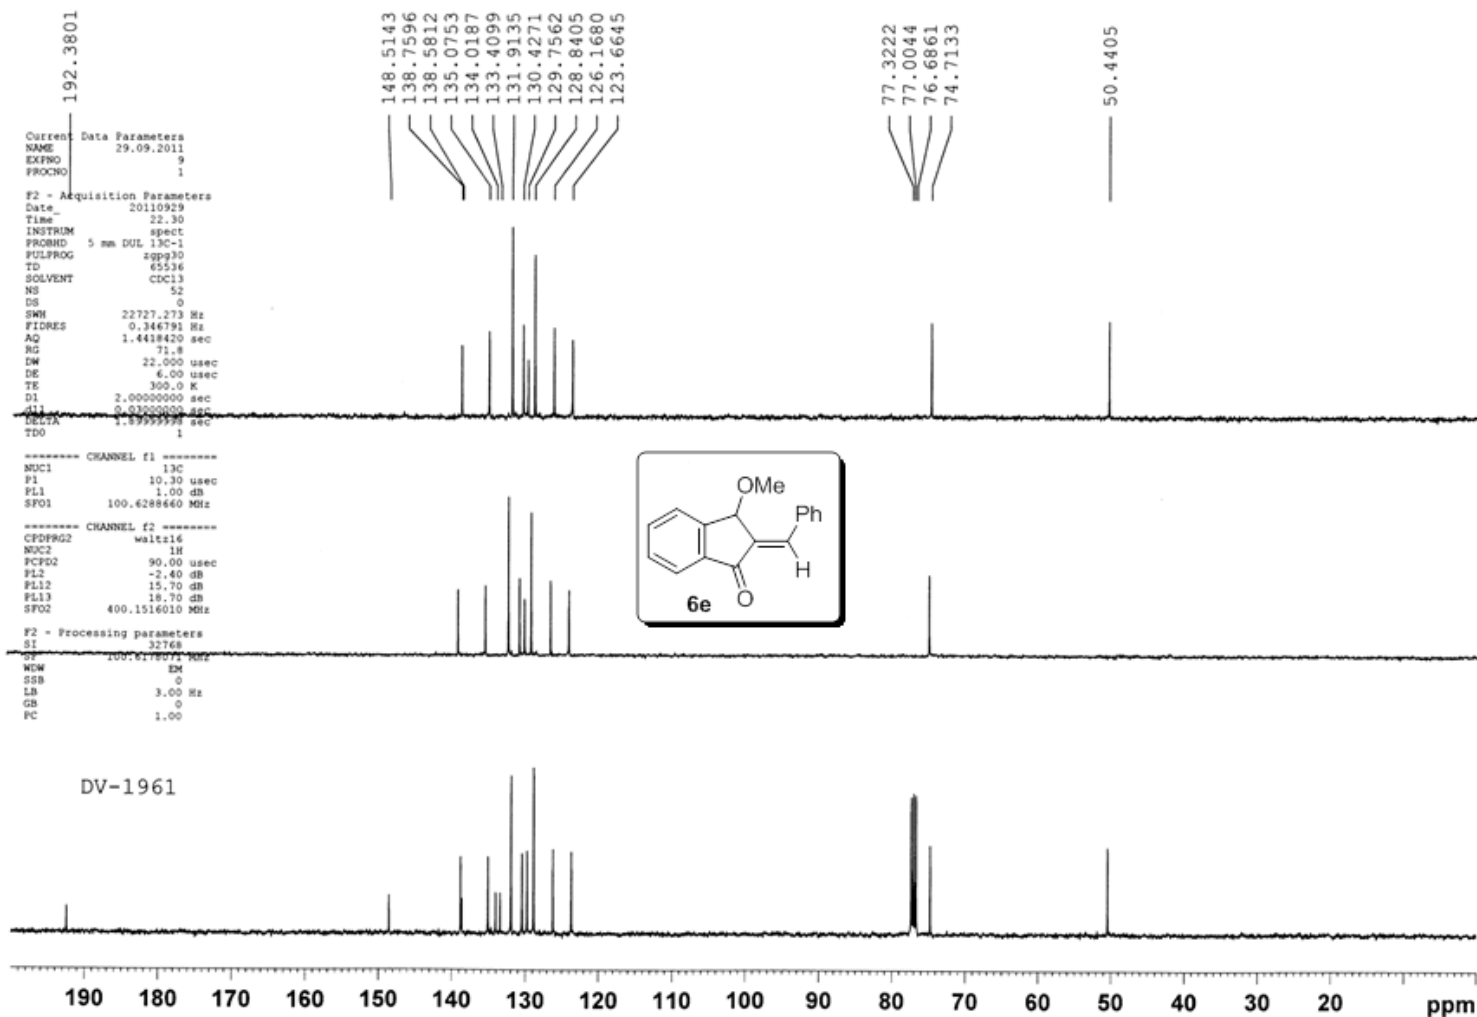

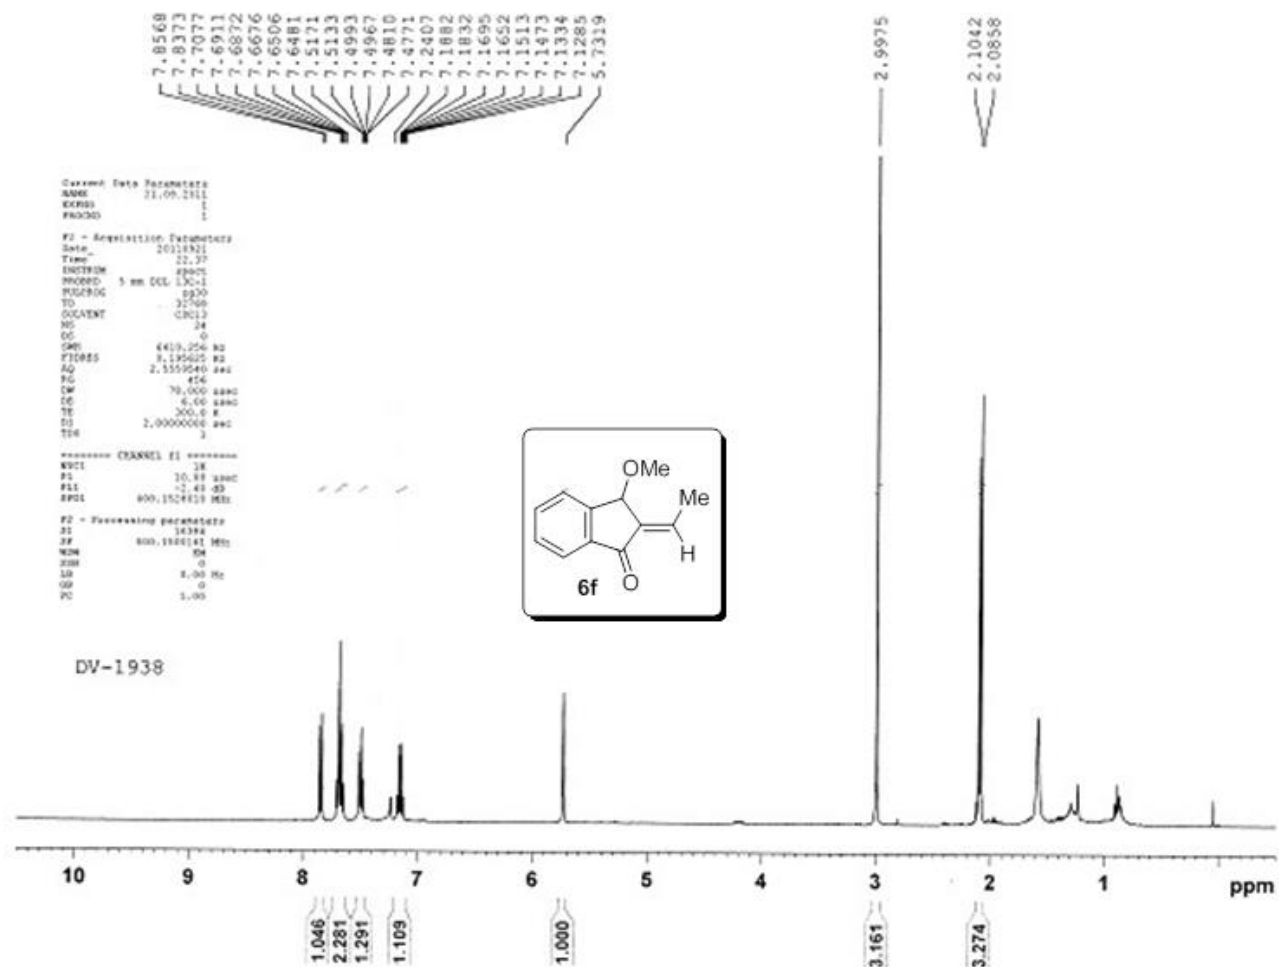

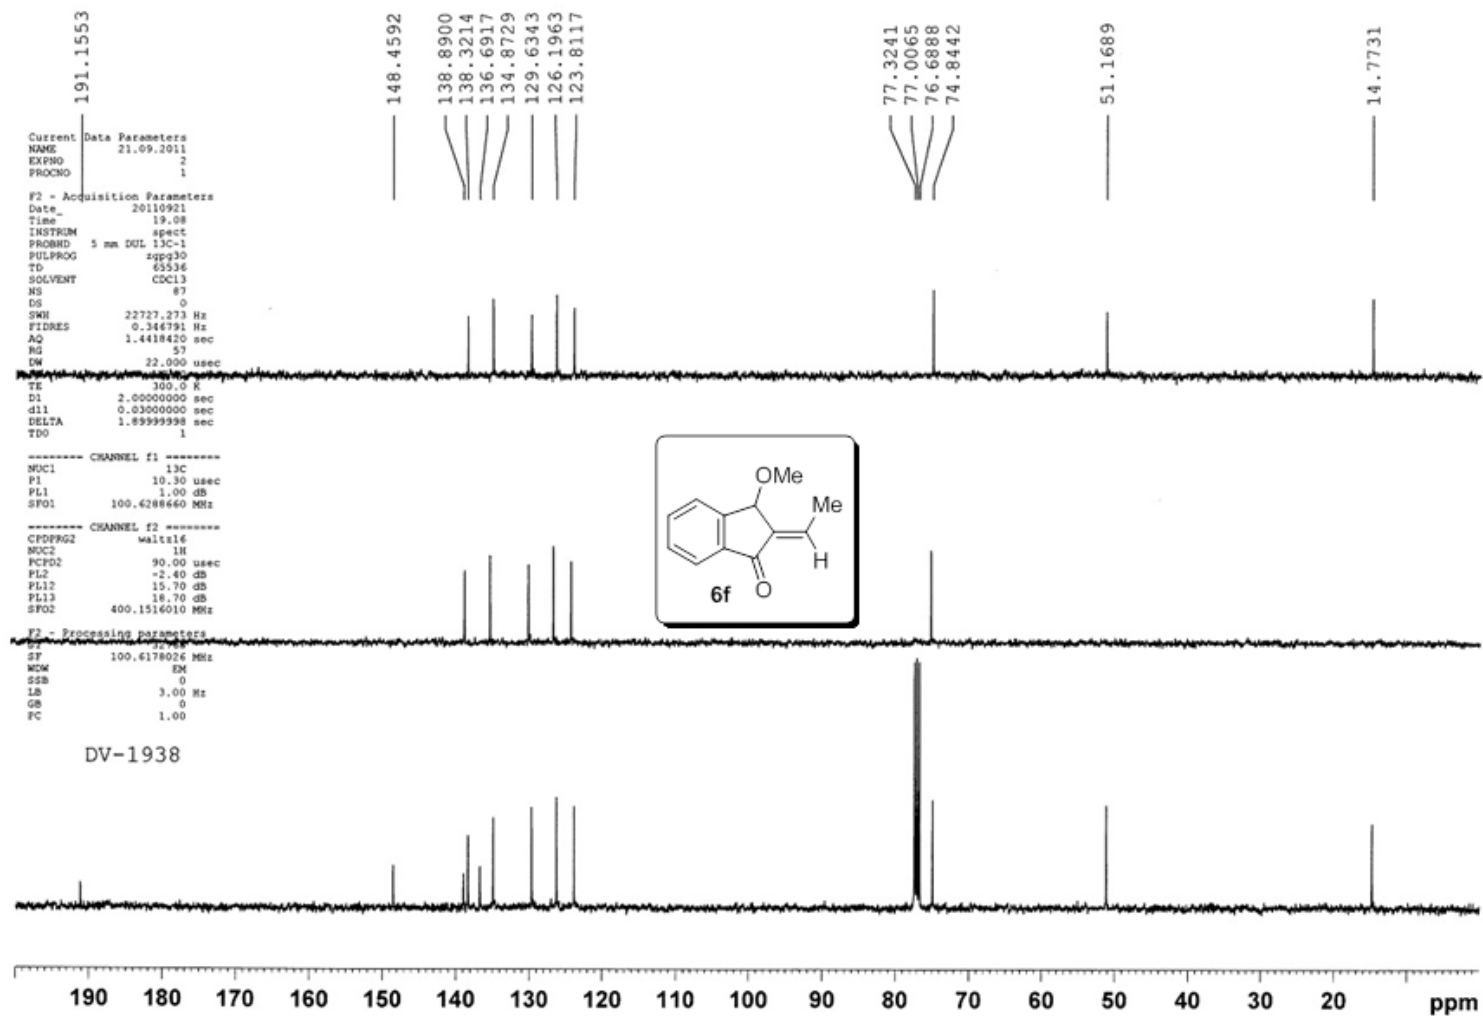

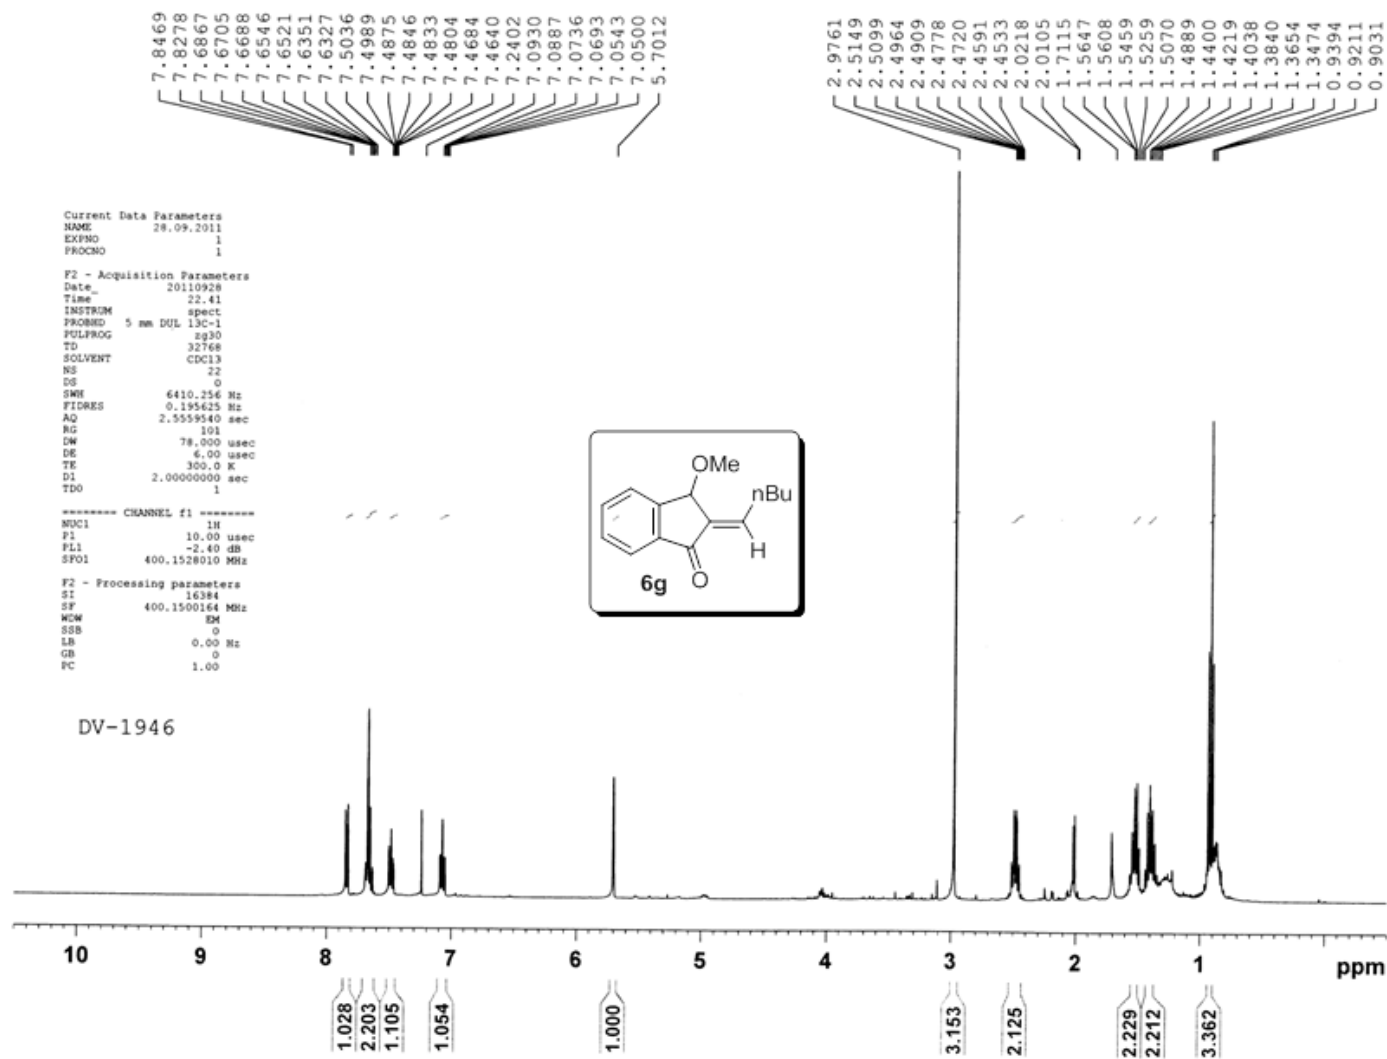



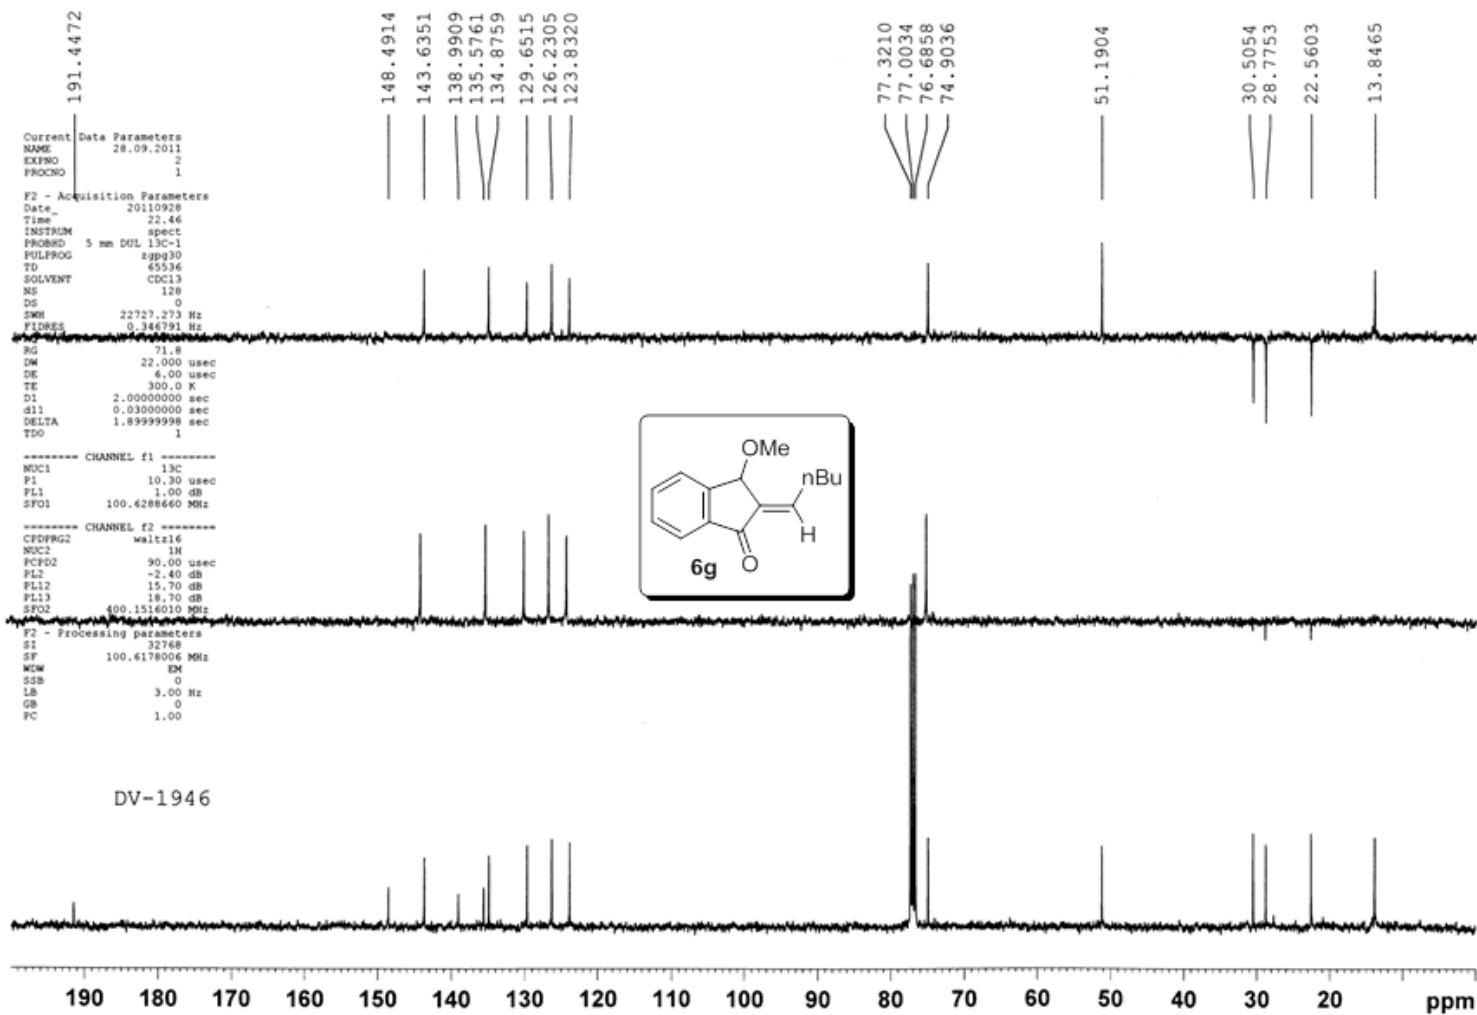

**$^1\text{H}$  NOE spectra of compounds 4c, 4e, and 4f**

# NOE of compound 4c

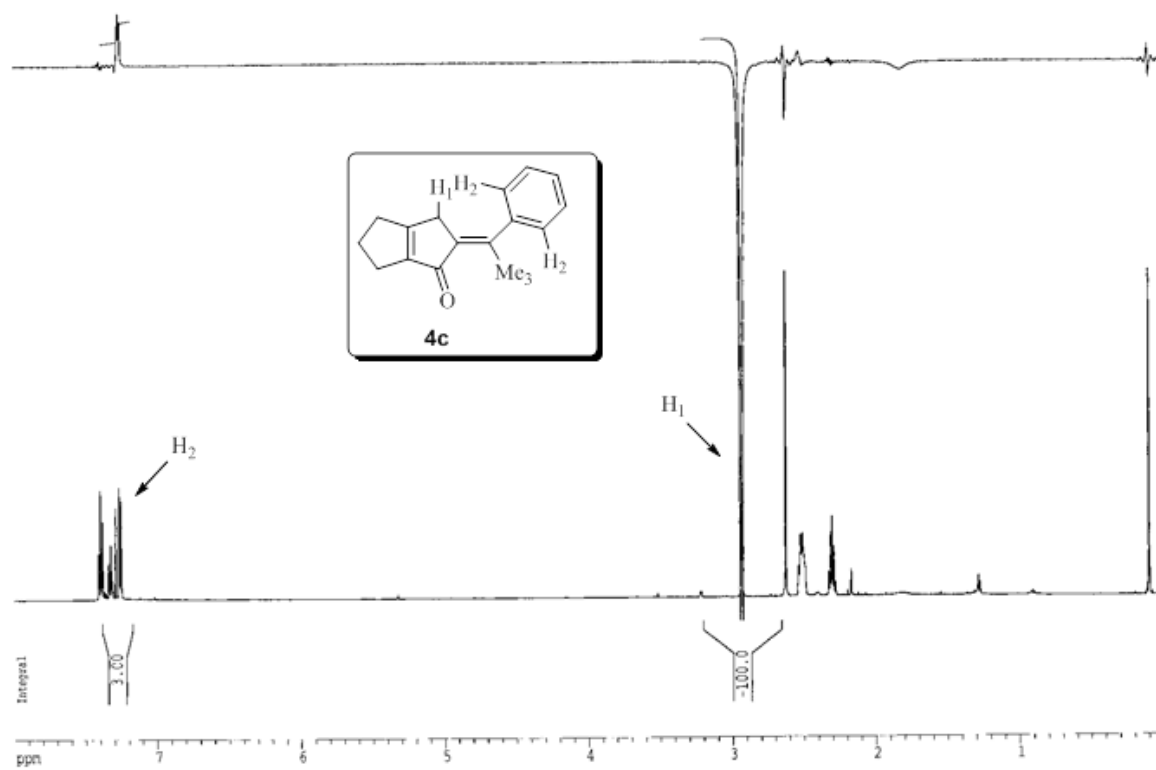

# NOE of compound 4c

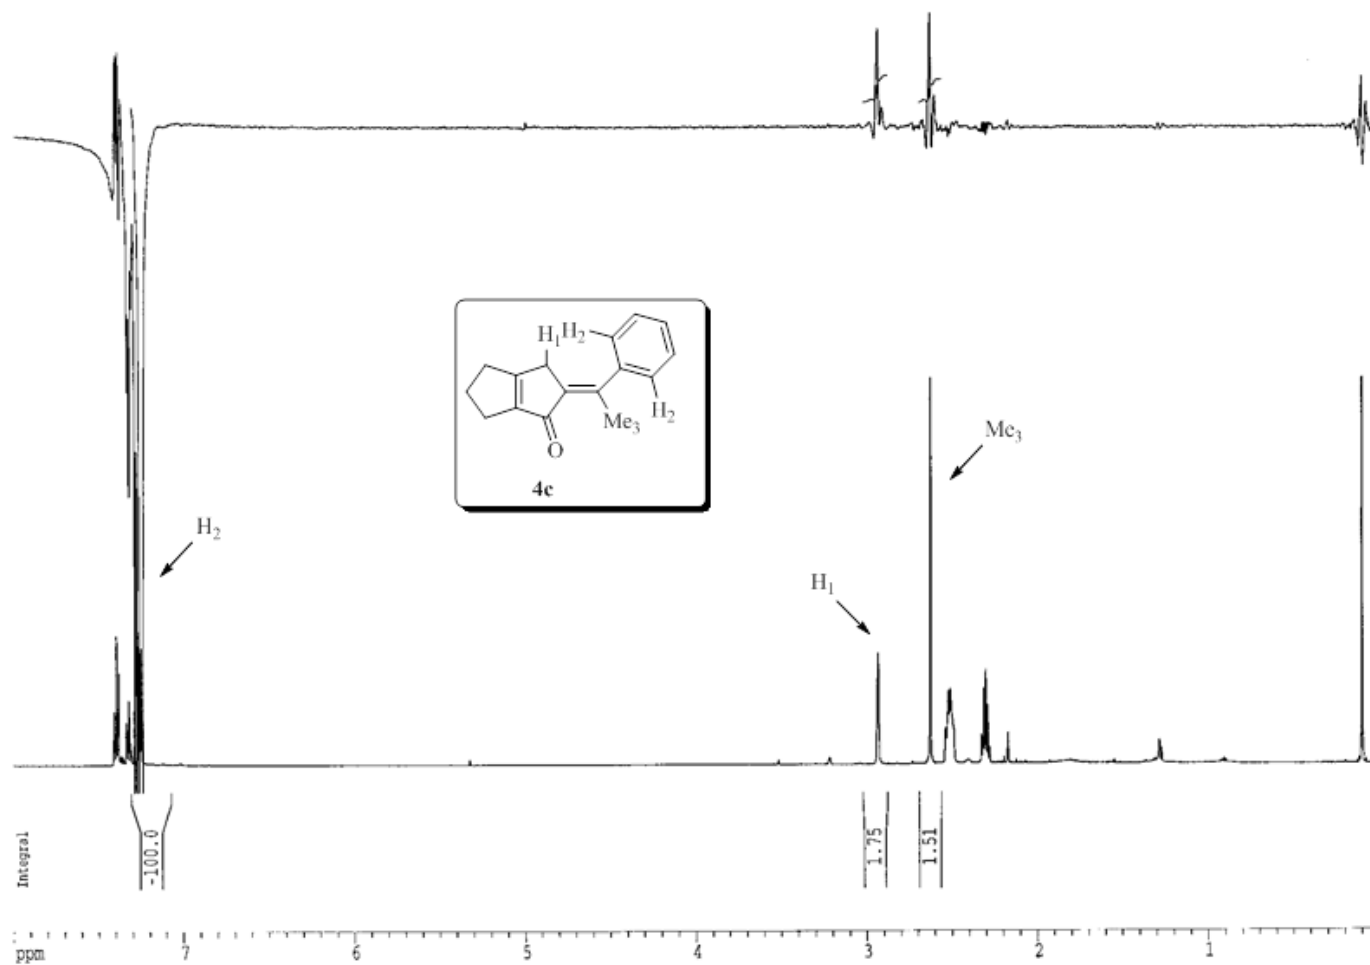

# NOE of compound 4c

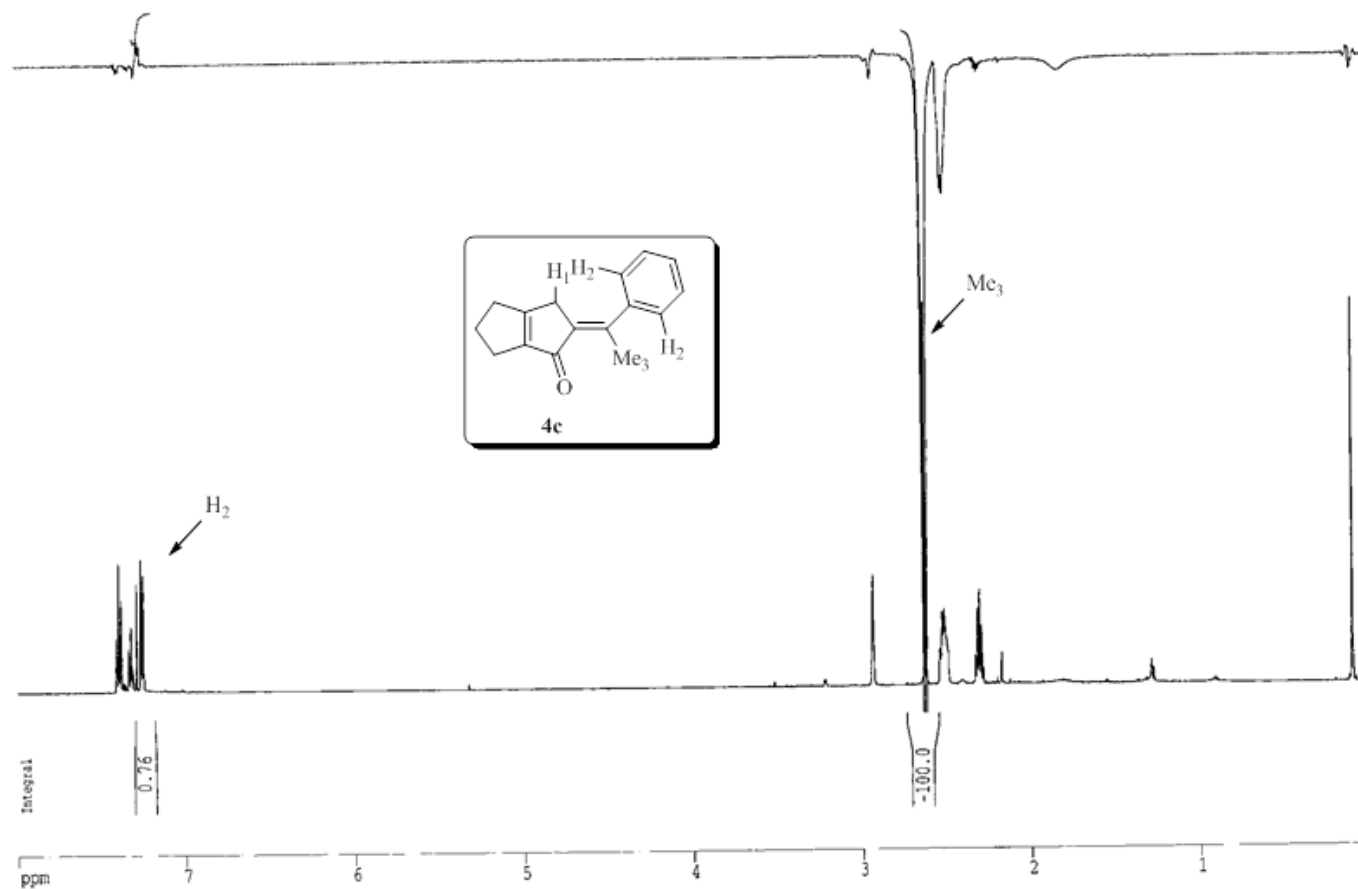

# NOE of compound 4e

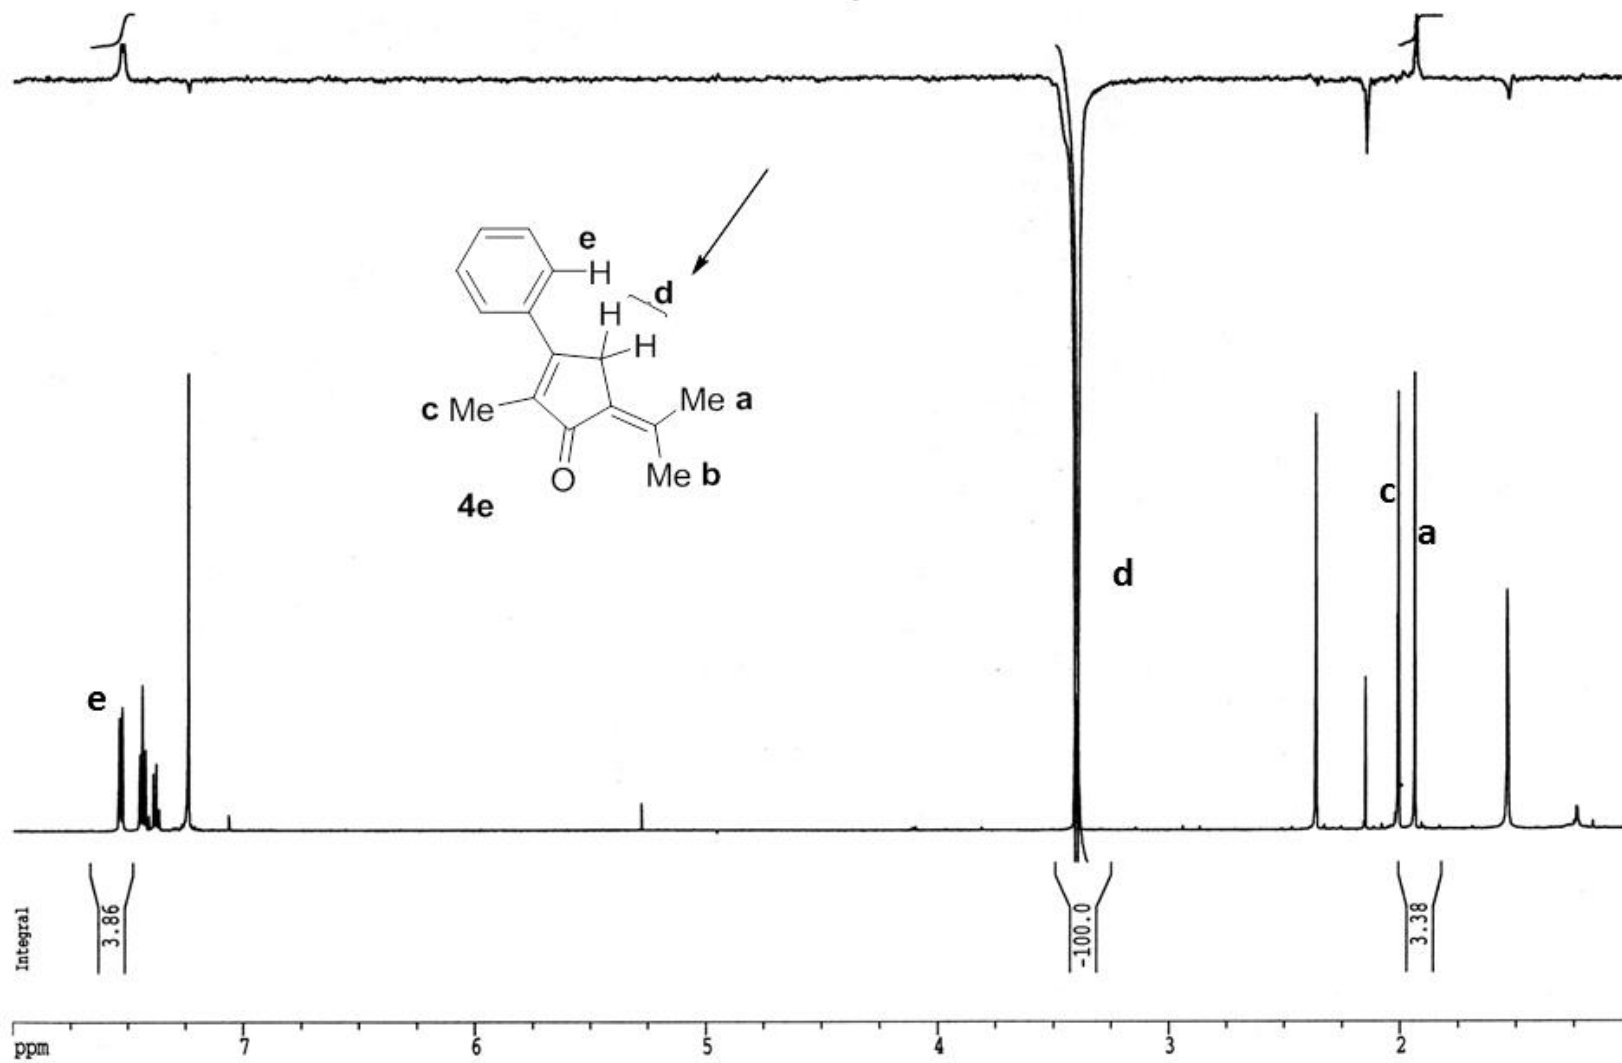

# NOE of compound 4e

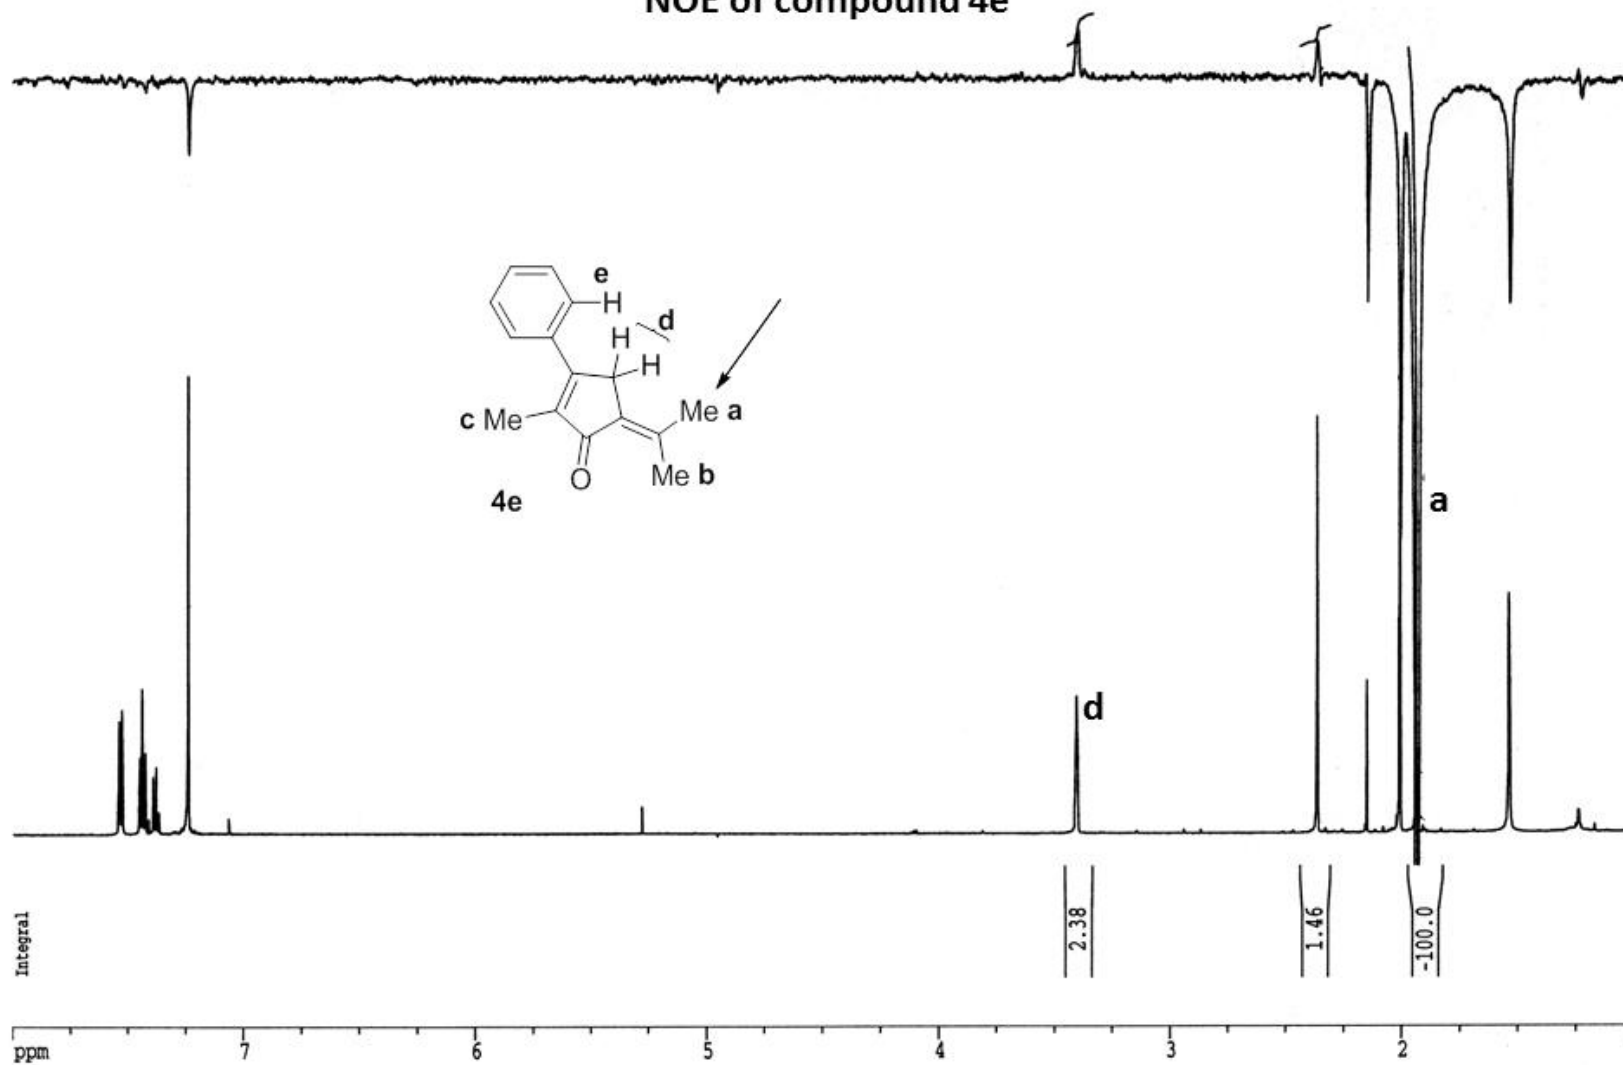

# NOE of compound 4e

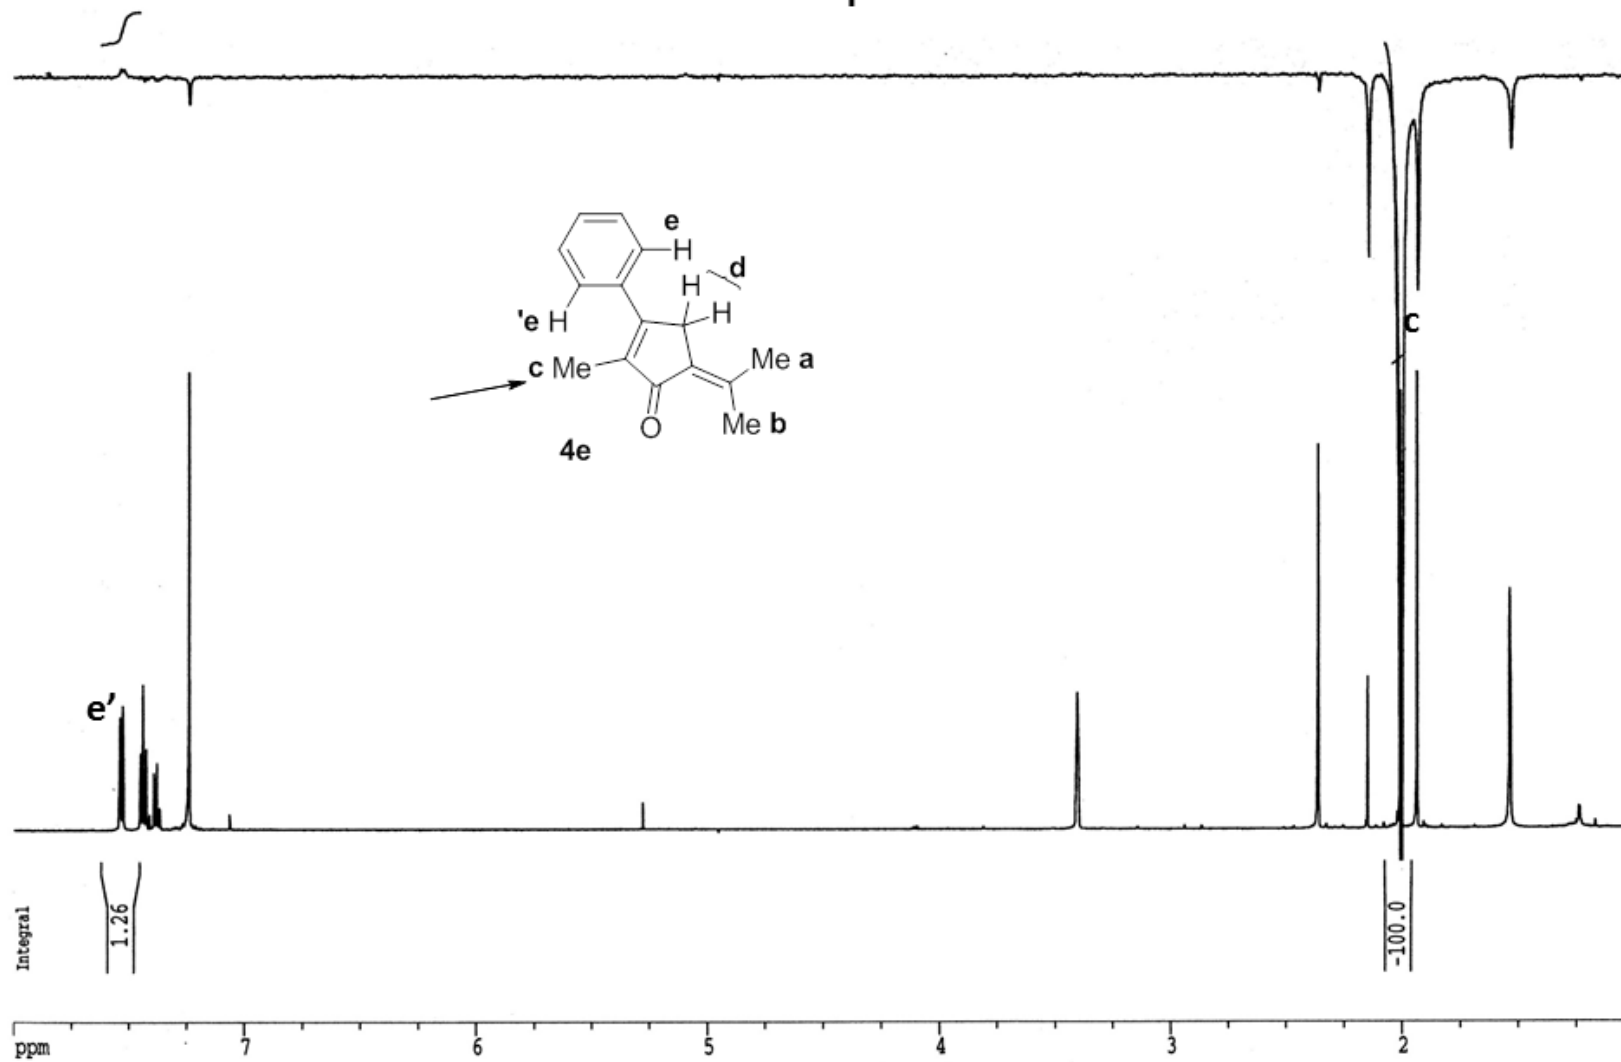



# NOE of compound 4e

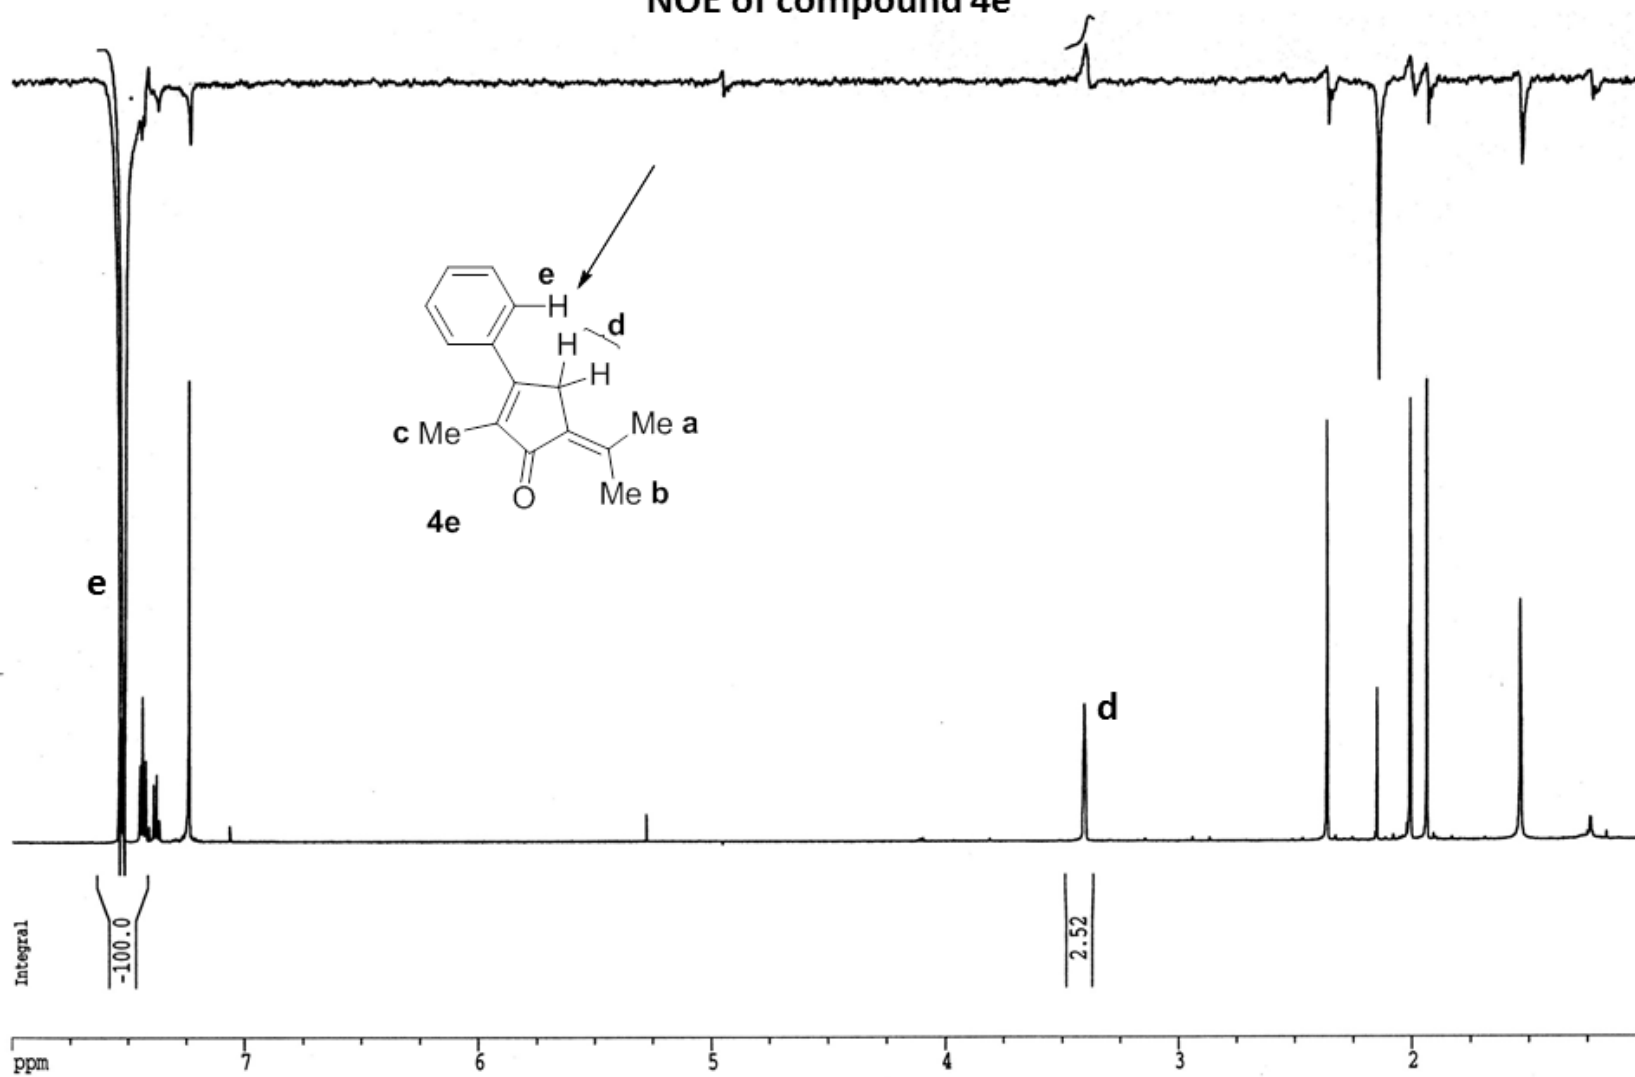

# NOE of compound 4f

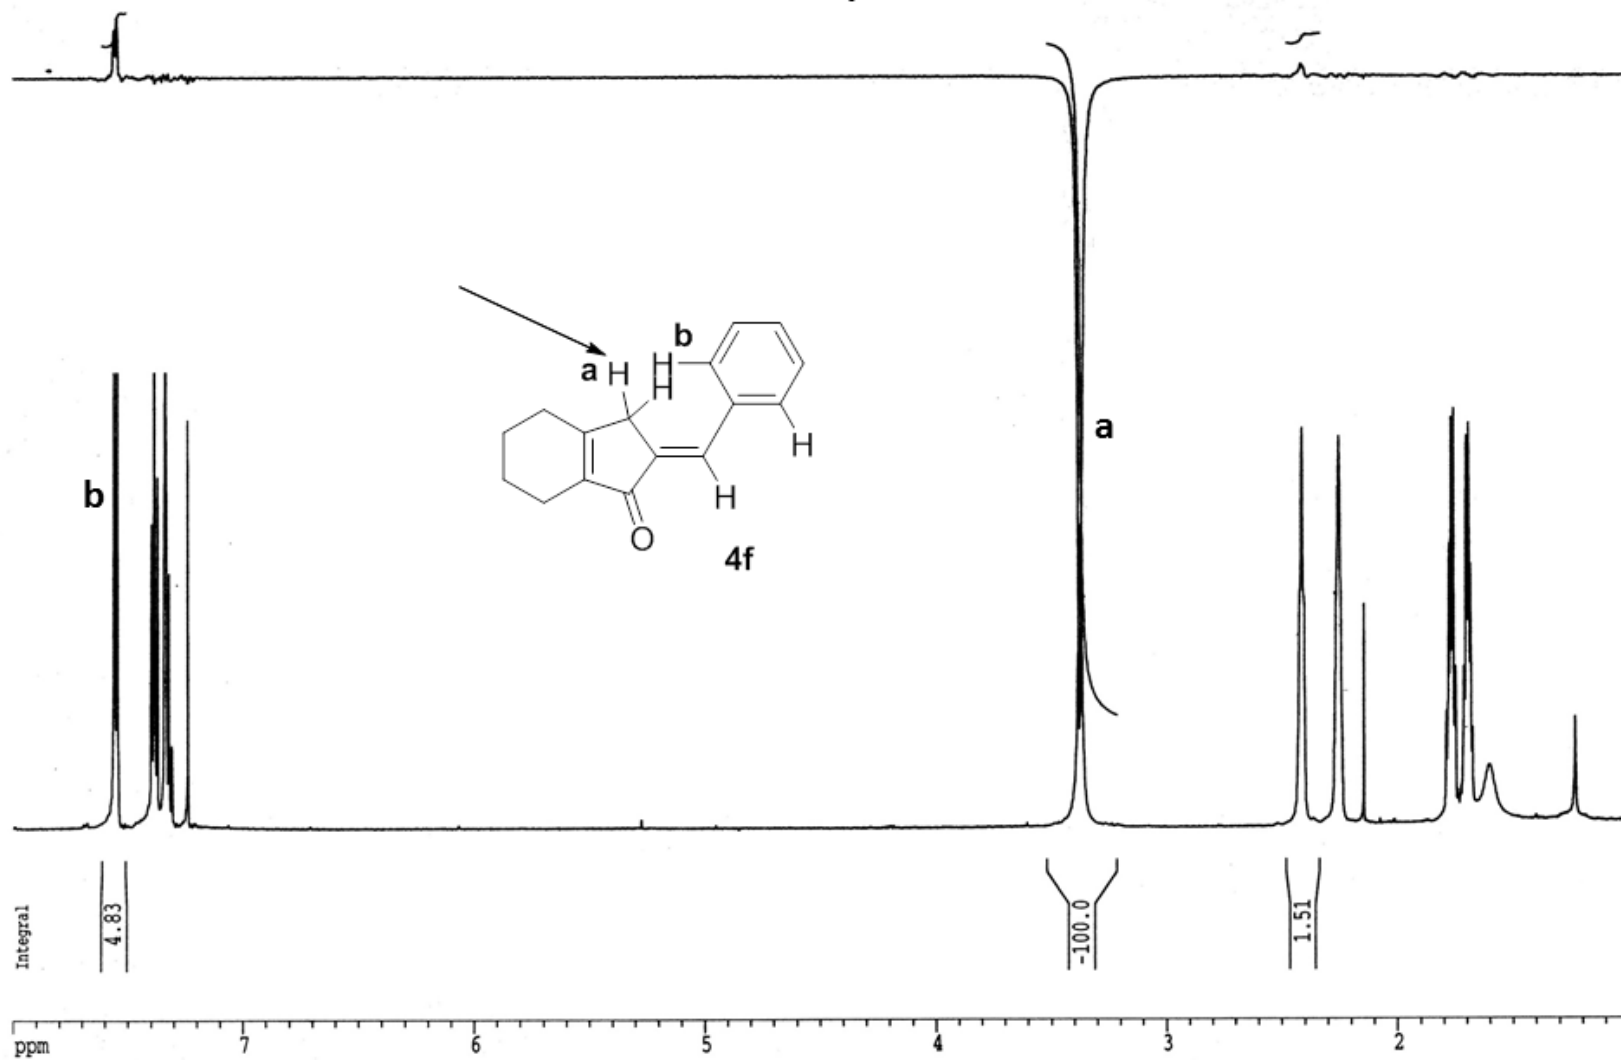

# NOE of compound 4f

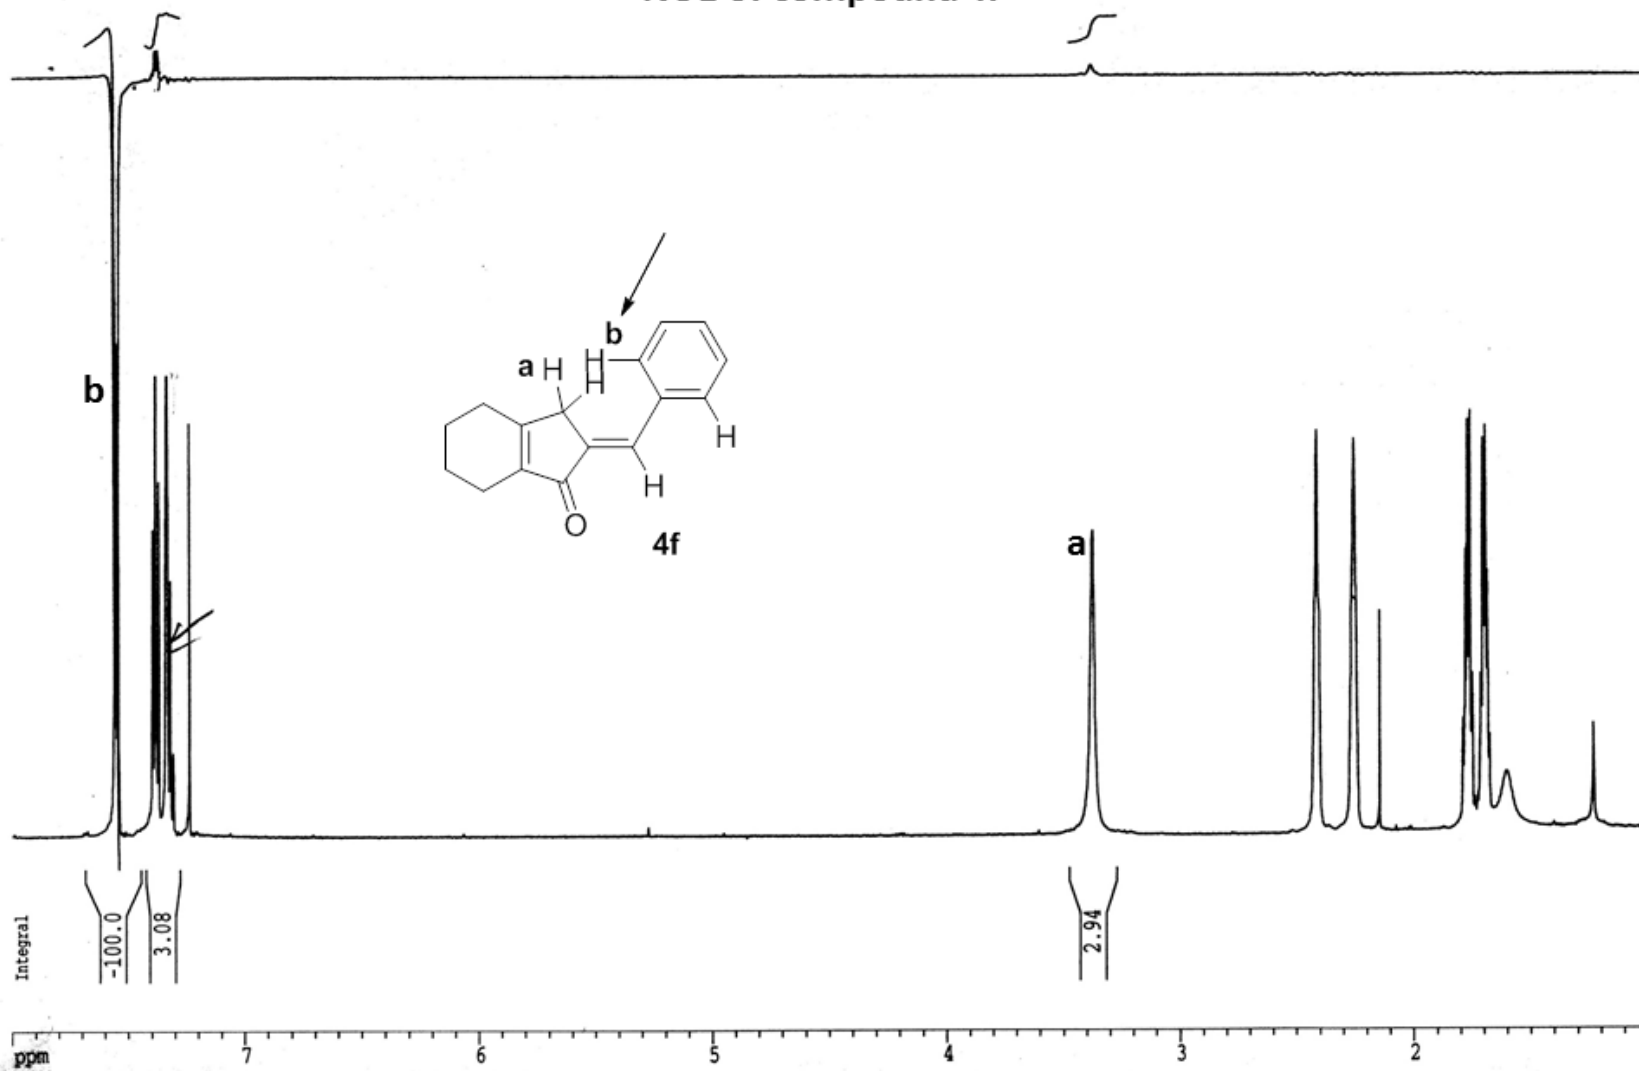

## **X-ray structure of compound 6a**

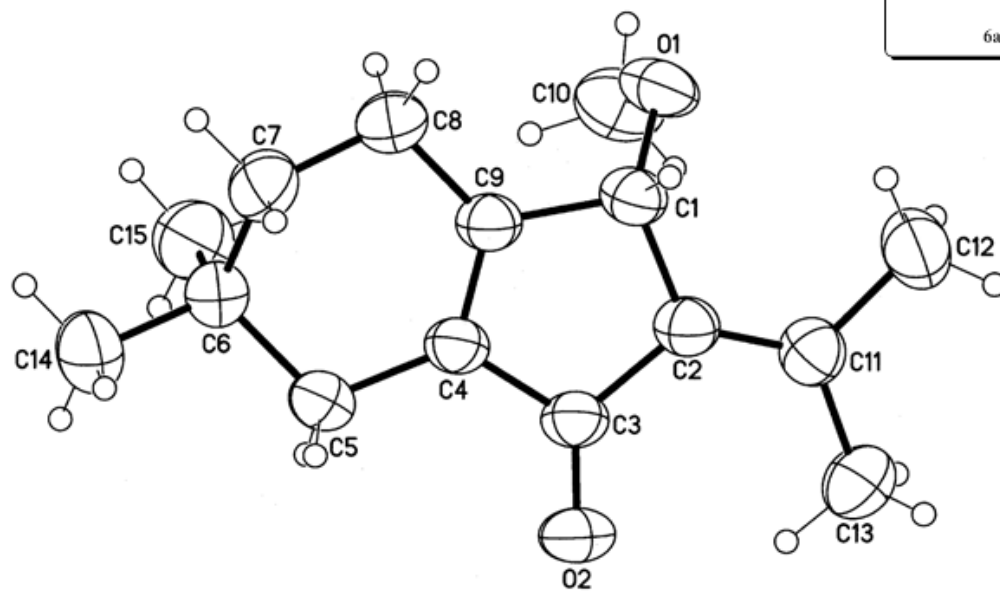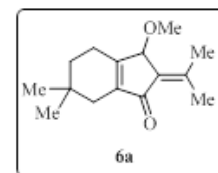

Table 1. Crystal data and structure refinement for 08NV24\_0m.

|                                 |                                                               |                        |
|---------------------------------|---------------------------------------------------------------|------------------------|
| Identification code             | 08nv24_0m                                                     |                        |
| Empirical formula               | C <sub>15</sub> H <sub>22</sub> O <sub>2</sub>                |                        |
| Formula weight                  | 234.33                                                        |                        |
| Temperature                     | 296(2) K                                                      |                        |
| Wavelength                      | 0.71073 Å                                                     |                        |
| Crystal system                  | Triclinic                                                     |                        |
| Space group                     | <i>P</i> -1                                                   |                        |
| Unit cell dimensions            | <i>a</i> = 8.0947(3) Å                                        | $\alpha$ = 79.573(2)°. |
|                                 | <i>b</i> = 9.4471(3) Å                                        | $\beta$ = 87.361(2)°.  |
|                                 | <i>c</i> = 9.5269(3) Å                                        | $\gamma$ = 72.261(2)°. |
| Volume                          | 682.41(4) Å <sup>3</sup>                                      |                        |
| <i>Z</i>                        | 2                                                             |                        |
| Density (calculated)            | 1.140 Mg/m <sup>3</sup>                                       |                        |
| Absorption coefficient          | 0.074 mm <sup>-1</sup>                                        |                        |
| <i>F</i> (000)                  | 256                                                           |                        |
| Crystal size                    | 0.30 x 0.30 x 0.30 mm <sup>3</sup>                            |                        |
| Theta range for data collection | 2.17 to 28.32°.                                               |                        |
| Index ranges                    | -10 ≤ <i>h</i> ≤ 10, -12 ≤ <i>k</i> ≤ 10, -11 ≤ <i>l</i> ≤ 12 |                        |
| Reflections collected           | 12717                                                         |                        |
| Independent reflections         | 3373 [ <i>R</i> (int) = 0.0189]                               |                        |
| Completeness to theta = 28.32°  | 99.3 %                                                        |                        |
| Absorption correction           | Empirical                                                     |                        |
| Max. and min. transmission      | 0.7454 and 0.7120                                             |                        |
| Refinement method               | Full-matrix least-squares on <i>F</i> <sup>2</sup>            |                        |
| Data / restraints / parameters  | 3373 / 0 / 159                                                |                        |

|                                      |                                       |
|--------------------------------------|---------------------------------------|
| Goodness-of-fit on $F^2$             | 1.071                                 |
| Final R indices [ $I > 2\sigma(I)$ ] | $R1 = 0.0464$ , $wR2 = 0.1411$        |
| R indices (all data)                 | $R1 = 0.0580$ , $wR2 = 0.1523$        |
| Largest diff. peak and hole          | 0.220 and -0.146 e. $\text{\AA}^{-3}$ |

Table 2. Atomic coordinates ( $\times 10^4$ ) and equivalent isotropic displacement parameters ( $\text{\AA}^2 \times 10^3$ ) for 08NV24\_0m.  $U(\text{eq})$  is defined as one third of the trace of the orthogonalized  $U^{ij}$  tensor.

|       | x        | y       | z        | $U(\text{eq})$ |
|-------|----------|---------|----------|----------------|
| C(4)  | 7020(1)  | 2004(1) | 8695(1)  | 43(1)          |
| C(1)  | 3985(2)  | 2370(1) | 8785(1)  | 46(1)          |
| C(3)  | 6592(2)  | 1712(1) | 10219(1) | 45(1)          |
| C(9)  | 5578(2)  | 2369(1) | 7899(1)  | 44(1)          |
| C(2)  | 4680(2)  | 1980(1) | 10305(1) | 44(1)          |
| C(5)  | 8792(2)  | 1899(2) | 8124(1)  | 50(1)          |
| C(6)  | 8748(2)  | 2636(2) | 6542(1)  | 52(1)          |
| C(11) | 3732(2)  | 1883(2) | 11493(1) | 50(1)          |
| C(8)  | 5564(2)  | 2737(2) | 6312(1)  | 58(1)          |
| C(7)  | 7398(2)  | 2228(2) | 5736(1)  | 61(1)          |
| C(13) | 4487(2)  | 1514(2) | 12972(1) | 64(1)          |
| C(12) | 1806(2)  | 2175(2) | 11428(2) | 69(1)          |
| C(15) | 8273(2)  | 4342(2) | 6431(2)  | 74(1)          |
| C(14) | 10536(2) | 2058(2) | 5895(2)  | 76(1)          |
| C(10) | 2965(2)  | 5043(2) | 8723(2)  | 73(1)          |
| O(1)  | 2604(1)  | 3748(1) | 8429(1)  | 60(1)          |
| O(2)  | 7643(1)  | 1320(1) | 11202(1) | 66(1)          |



Table 3. Bond lengths [Å] and angles [°] for 08NV24\_0m.

|              |            |
|--------------|------------|
| C(4)-C(9)    | 1.3415(16) |
| C(4)-C(3)    | 1.4734(16) |
| C(4)-C(5)    | 1.4918(16) |
| C(1)-O(1)    | 1.4307(15) |
| C(1)-C(9)    | 1.5080(17) |
| C(1)-C(2)    | 1.5183(16) |
| C(1)-H(1)    | 0.9800     |
| C(3)-O(2)    | 1.2223(14) |
| C(3)-C(2)    | 1.4909(16) |
| C(9)-C(8)    | 1.4879(17) |
| C(2)-C(11)   | 1.3435(18) |
| C(5)-C(6)    | 1.5389(17) |
| C(5)-H(5A)   | 0.9700     |
| C(5)-H(5B)   | 0.9700     |
| C(6)-C(15)   | 1.524(2)   |
| C(6)-C(14)   | 1.5268(19) |
| C(6)-C(7)    | 1.5404(19) |
| C(11)-C(13)  | 1.5004(18) |
| C(11)-C(12)  | 1.5006(19) |
| C(8)-C(7)    | 1.524(2)   |
| C(8)-H(8A)   | 0.9700     |
| C(8)-H(8B)   | 0.9700     |
| C(7)-H(7A)   | 0.9700     |
| C(7)-H(7B)   | 0.9700     |
| C(13)-H(13A) | 0.9600     |

|                |            |
|----------------|------------|
| C(13)-H(13B)   | 0.9600     |
| C(13)-H(13C)   | 0.9600     |
| C(12)-H(12A)   | 0.9600     |
| C(12)-H(12B)   | 0.9600     |
| C(12)-H(12C)   | 0.9600     |
| C(15)-H(15A)   | 0.9600     |
| C(15)-H(15B)   | 0.9600     |
| C(15)-H(15C)   | 0.9600     |
| C(14)-H(14A)   | 0.9600     |
| C(14)-H(14B)   | 0.9600     |
| C(14)-H(14C)   | 0.9600     |
| C(10)-O(1)     | 1.417(2)   |
| C(10)-H(10A)   | 0.9600     |
| C(10)-H(10B)   | 0.9600     |
| C(10)-H(10C)   | 0.9600     |
|                |            |
| C(9)-C(4)-C(3) | 109.78(11) |
| C(9)-C(4)-C(5) | 125.11(11) |
| C(3)-C(4)-C(5) | 125.11(10) |
| O(1)-C(1)-C(9) | 112.35(10) |
| O(1)-C(1)-C(2) | 116.54(10) |
| C(9)-C(1)-C(2) | 103.15(9)  |
| O(1)-C(1)-H(1) | 108.1      |
| C(9)-C(1)-H(1) | 108.1      |
| C(2)-C(1)-H(1) | 108.1      |
| O(2)-C(3)-C(4) | 124.99(11) |
| O(2)-C(3)-C(2) | 127.94(11) |

|                   |            |
|-------------------|------------|
| C(4)-C(3)-C(2)    | 107.07(9)  |
| C(4)-C(9)-C(8)    | 123.24(12) |
| C(4)-C(9)-C(1)    | 112.71(10) |
| C(8)-C(9)-C(1)    | 124.04(10) |
| C(11)-C(2)-C(3)   | 127.07(11) |
| C(11)-C(2)-C(1)   | 125.72(11) |
| C(3)-C(2)-C(1)    | 107.22(10) |
| C(4)-C(5)-C(6)    | 112.14(10) |
| C(4)-C(5)-H(5A)   | 109.2      |
| C(6)-C(5)-H(5A)   | 109.2      |
| C(4)-C(5)-H(5B)   | 109.2      |
| C(6)-C(5)-H(5B)   | 109.2      |
| H(5A)-C(5)-H(5B)  | 107.9      |
| C(15)-C(6)-C(14)  | 109.12(13) |
| C(15)-C(6)-C(5)   | 109.15(12) |
| C(14)-C(6)-C(5)   | 109.43(11) |
| C(15)-C(6)-C(7)   | 110.18(12) |
| C(14)-C(6)-C(7)   | 109.58(12) |
| C(5)-C(6)-C(7)    | 109.37(11) |
| C(2)-C(11)-C(13)  | 123.42(12) |
| C(2)-C(11)-C(12)  | 121.64(12) |
| C(13)-C(11)-C(12) | 114.92(12) |
| C(9)-C(8)-C(7)    | 110.65(10) |
| C(9)-C(8)-H(8A)   | 109.5      |
| C(7)-C(8)-H(8A)   | 109.5      |
| C(9)-C(8)-H(8B)   | 109.5      |
| C(7)-C(8)-H(8B)   | 109.5      |

|                     |            |
|---------------------|------------|
| H(8A)-C(8)-H(8B)    | 108.1      |
| C(8)-C(7)-C(6)      | 113.82(11) |
| C(8)-C(7)-H(7A)     | 108.8      |
| C(6)-C(7)-H(7A)     | 108.8      |
| C(8)-C(7)-H(7B)     | 108.8      |
| C(6)-C(7)-H(7B)     | 108.8      |
| H(7A)-C(7)-H(7B)    | 107.7      |
| C(11)-C(13)-H(13A)  | 109.5      |
| C(11)-C(13)-H(13B)  | 109.5      |
| H(13A)-C(13)-H(13B) | 109.5      |
| C(11)-C(13)-H(13C)  | 109.5      |
| H(13A)-C(13)-H(13C) | 109.5      |
| H(13B)-C(13)-H(13C) | 109.5      |
| C(11)-C(12)-H(12A)  | 109.5      |
| C(11)-C(12)-H(12B)  | 109.5      |
| H(12A)-C(12)-H(12B) | 109.5      |
| C(11)-C(12)-H(12C)  | 109.5      |
| H(12A)-C(12)-H(12C) | 109.5      |
| H(12B)-C(12)-H(12C) | 109.5      |
| C(6)-C(15)-H(15A)   | 109.5      |
| C(6)-C(15)-H(15B)   | 109.5      |
| H(15A)-C(15)-H(15B) | 109.5      |
| C(6)-C(15)-H(15C)   | 109.5      |
| H(15A)-C(15)-H(15C) | 109.5      |
| H(15B)-C(15)-H(15C) | 109.5      |
| C(6)-C(14)-H(14A)   | 109.5      |
| C(6)-C(14)-H(14B)   | 109.5      |

|                     |            |
|---------------------|------------|
| H(14A)-C(14)-H(14B) | 109.5      |
| C(6)-C(14)-H(14C)   | 109.5      |
| H(14A)-C(14)-H(14C) | 109.5      |
| H(14B)-C(14)-H(14C) | 109.5      |
| O(1)-C(10)-H(10A)   | 109.5      |
| O(1)-C(10)-H(10B)   | 109.5      |
| H(10A)-C(10)-H(10B) | 109.5      |
| O(1)-C(10)-H(10C)   | 109.5      |
| H(10A)-C(10)-H(10C) | 109.5      |
| H(10B)-C(10)-H(10C) | 109.5      |
| C(10)-O(1)-C(1)     | 114.56(10) |

---

Symmetry transformations used to generate equivalent atoms:

Table 4. Anisotropic displacement parameters ( $\text{\AA}^2 \times 10^3$ ) for 08NV24\_0m. The anisotropic displacement factor exponent takes the form:  $-2\pi^2 [h^2 a^{*2} U^{11} + \dots + 2 h k a^* b^* U^{12}]$

|      | $U^{11}$ | $U^{22}$ | $U^{33}$ | $U^{23}$ | $U^{13}$ | $U^{12}$ |
|------|----------|----------|----------|----------|----------|----------|
| C(4) | 38(1)    | 44(1)    | 42(1)    | -6(1)    | -4(1)    | -6(1)    |
| C(1) | 40(1)    | 52(1)    | 46(1)    | -10(1)   | -5(1)    | -11(1)   |
| C(3) | 42(1)    | 44(1)    | 42(1)    | -5(1)    | -5(1)    | -5(1)    |
| C(9) | 42(1)    | 48(1)    | 41(1)    | -8(1)    | -5(1)    | -10(1)   |
| C(2) | 42(1)    | 46(1)    | 42(1)    | -9(1)    | -3(1)    | -10(1)   |
| C(5) | 39(1)    | 59(1)    | 49(1)    | -6(1)    | -3(1)    | -9(1)    |

|       |       |        |       |        |        |        |
|-------|-------|--------|-------|--------|--------|--------|
| C(6)  | 47(1) | 61(1)  | 48(1) | -6(1)  | 2(1)   | -17(1) |
| C(11) | 49(1) | 53(1)  | 48(1) | -14(1) | 3(1)   | -15(1) |
| C(8)  | 55(1) | 80(1)  | 41(1) | -6(1)  | -8(1)  | -23(1) |
| C(7)  | 62(1) | 83(1)  | 43(1) | -13(1) | 2(1)   | -27(1) |
| C(13) | 69(1) | 78(1)  | 44(1) | -12(1) | 3(1)   | -20(1) |
| C(12) | 53(1) | 92(1)  | 66(1) | -22(1) | 10(1)  | -27(1) |
| C(15) | 72(1) | 63(1)  | 85(1) | 2(1)   | -4(1)  | -26(1) |
| C(14) | 56(1) | 103(1) | 66(1) | -16(1) | 14(1)  | -23(1) |
| C(10) | 60(1) | 55(1)  | 90(1) | -10(1) | -10(1) | 2(1)   |
| O(1)  | 39(1) | 67(1)  | 66(1) | -10(1) | -13(1) | -4(1)  |
| O(2)  | 49(1) | 89(1)  | 46(1) | 1(1)   | -13(1) | -7(1)  |

---

Table 5. Hydrogen coordinates ( $\times 10^4$ ) and isotropic displacement parameters ( $\text{\AA}^2 \times 10^{-3}$ ) for 08NV24\_0m.

|        | x     | y    | z     | U(eq) |
|--------|-------|------|-------|-------|
| H(1)   | 3580  | 1542 | 8603  | 55    |
| H(5A)  | 9476  | 845  | 8229  | 61    |
| H(5B)  | 9353  | 2391 | 8678  | 61    |
| H(8A)  | 5068  | 3818 | 6008  | 70    |
| H(8B)  | 4847  | 2240 | 5928  | 70    |
| H(7A)  | 7390  | 2685 | 4738  | 74    |
| H(7B)  | 7749  | 1142 | 5788  | 74    |
| H(13A) | 5714  | 1365 | 12917 | 97    |
| H(13B) | 4276  | 610  | 13474 | 97    |
| H(13C) | 3954  | 2333 | 13472 | 97    |
| H(12A) | 1226  | 3171 | 11613 | 103   |
| H(12B) | 1479  | 1446 | 12131 | 103   |
| H(12C) | 1481  | 2093 | 10496 | 103   |
| H(15A) | 7184  | 4703 | 6893  | 111   |
| H(15B) | 8177  | 4812 | 5444  | 111   |
| H(15C) | 9158  | 4587 | 6887  | 111   |
| H(14A) | 11373 | 2325 | 6390  | 113   |
| H(14B) | 10505 | 2506 | 4904  | 113   |
| H(14C) | 10855 | 980  | 5984  | 113   |
| H(10A) | 3019  | 4986 | 9737  | 109   |
| H(10B) | 2063  | 5933 | 8321  | 109   |

H(10C)

4057

5087

8311

109

---
